# Supplementary material for: Asymmetric synthesis of γ-lactams under low-loading N-heterocyclic carbene catalysis
Source: Royal Society of Chemistry journal article supplement (doi:10.1039/d1qo00743b), 2021-01-01
Supplement: d1qo00743b1.pdf [file d1qo00743b1.pdf]

## Supplementary Information

### Asymmetric Synthesis of $\gamma$ -Lactams under Low-loading *N*-Heterocyclic Carbenes Catalysis

Yuxia Zhang,<sup>†,§</sup> Ye Zhang,<sup>†,§</sup> Jingcheng Guo,<sup>†,§</sup> Jinna Han,<sup>†</sup> Xiangui Zhou,<sup>†</sup> Zhenqian

Fu,<sup>\*,†</sup>

<sup>†</sup> Key Laboratory of Flexible Electronics & Institute of Advanced Materials, Nanjing  
Tech University, 30 South Puzhu Road, Nanjing 211816, China.

E-mail: [iamzqfu@njtech.edu.cn](mailto:iamzqfu@njtech.edu.cn)

|            |                                                                                                                                                                                                                                                                                                                                                                                                                                                                                                                                                                           |
|------------|---------------------------------------------------------------------------------------------------------------------------------------------------------------------------------------------------------------------------------------------------------------------------------------------------------------------------------------------------------------------------------------------------------------------------------------------------------------------------------------------------------------------------------------------------------------------------|
| <b>I</b>   | General information                                                                                                                                                                                                                                                                                                                                                                                                                                                                                                                                                       |
| <b>II</b>  | a) General procedure for the synthesis of enals <b>1</b><br>b) General procedure for the synthesis of <i>N</i> -Ts diethyl aminomalonate <b>2</b><br>c) Experimental data of other Lewis acids<br>d) Experimental data of other acyazolium precursors<br>e) General procedure for the reactions of <b>1</b> with <b>2</b> to synthesize product <b>3</b> ( <b>3a</b> as an example)<br>f) General procedure for the reactions of <b>3ab</b> to synthesize product <b>4</b> and <b>5</b><br>g) Stereochemistry determination <b>3a</b> via X-ray crystallographic analysis |
| <b>III</b> | a) Characterizations of products<br>b) References                                                                                                                                                                                                                                                                                                                                                                                                                                                                                                                         |
| <b>IV</b>  | <sup>1</sup> H, <sup>13</sup> C NMR spectra and HPLC data of products                                                                                                                                                                                                                                                                                                                                                                                                                                                                                                     |

## I: General Information

Commercially available materials were purchased from Alfa Aesar and Sigma-Aldrich. Toluene and DCM was dried over Pure Solv solvent purification system. THF was distilled over sodium. Other solvents were dried over 4Å molecular sieve prior use. Proton nuclear magnetic resonance ( $^1\text{H}$  NMR) spectra were recorded on a Bruker (400 MHz) spectrometer. Chemical shifts were recorded in parts per million (ppm,  $\delta$ ) relative to tetramethylsilane ( $\delta$  0.00) or chloroform ( $\delta$  = 7.26, singlet).  $^1\text{H}$  NMR splitting patterns are designated as singlet (s), doublet (d), triplet (t), quartet (q), dd (doublet of doublets), m (multiplets), and etc. All first-order splitting patterns were assigned on the basis of the appearance of the multiplet. Splitting patterns that could not be easily interpreted are designated as multiplet (m) or broad (br). Carbon nuclear magnetic resonance ( $^{13}\text{C}$  NMR) spectra were recorded on a Bruker (400 MHz) (100 MHz) spectrometer. High resolution mass spectral analysis (HRMS) was performed on a Waters Q-TOF Premier Spectrometer. The determination of enantiomeric excess was performed *via* chiral HPLC analysis using Shimadzu LC-20AD HPLC workstation. X-ray crystallography analysis was performed on Bruker X8 APEX X-ray diffractionmeter. Optical rotations were measured using a 1 mL cell with a 1 dm path length on a Jasco P-1030 polarimeter and are reported as follows:  $[\alpha]_D^{rt}$  ( $c$  is in gm per 100 mL solvent). Analytical thin-layer chromatography (TLC) was carried out on Merck 60 F254 pre-coated silica gel plate (0.2 mm thickness).

## II. General procedure

### a) General procedure for the synthesis of enals **1**

**1a-1h, 1l, 1n, 1o, 1q, 1s** and **1t** were purchased. Enals **1i-1k, 1m, 1p, 1r, 1u-1x** were synthesized according to the literature.<sup>[1-5]</sup> To a dried 50 mL flask was added formylmethylene)triphenylphosphorane (1.521 g, 5 mmol), aldehydes (7 mmol) and 25 mL toluene. The mixture was refluxed overnight (detected by TLC), and then the solvent was removed under reduced pressure. The residue was purified by silica column chromatography to afford the product **1**.

### b) General procedure for the synthesis of *N*-Ts diethyl aminomalonate **2**

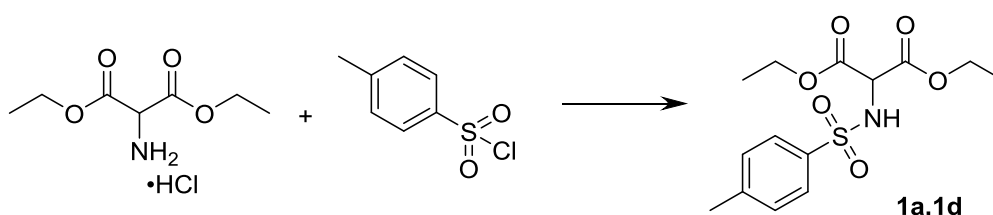

**2a** and **2d** were synthesized according to the literature.<sup>[6]</sup> *p*-Toluenesulfonyl chloride (3.8 g, 20 mmol) was added to a suspension of diethyl aminomalonate hydrochloride (4.22 g, 20 mmol) in 10 mL pyridine at 0 °C. The mixture was warmed to room temperature and stirred for 12h (detected by TLC). Upon completion of the reaction, to the mixture was poured into 50 mL ice water with stirring. The precipitated solid was filtered off and washed with water, and then recrystallization from EA/PE afforded the product **2a** (5.3g, 80% yield).

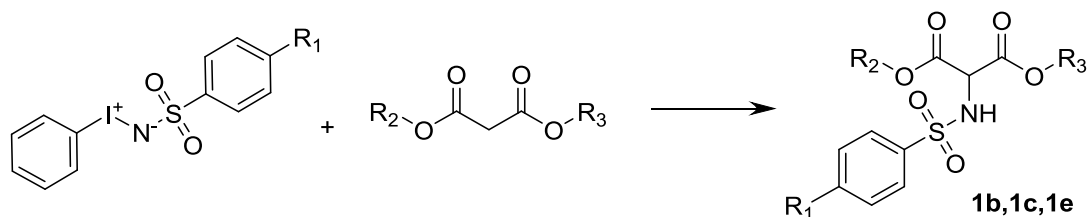

**2b, 2c** and **2e** were synthesized according to the literature.<sup>[7,8]</sup> Cu(OTf)<sub>2</sub> (0.1 mmol), 1,10-phen (0.1 mmol), and powdered 4Å MS (600 mg) were added to a solution of dry CH<sub>2</sub>Cl<sub>2</sub> (5 mL) at 0°C. After stirring for 1 h at the same temperature, 1,3-dicarbonyl compound (1.0 mmol) and PhI=NTs or PhI=NNs<sup>[9]</sup> (2 mmol) was added to the mixture and then the reaction mixture was stirred at room temperature until the reaction completed (detected by TLC). The crude product was filtered through Celite, washed with EtOAc (30 mL), evaporated to dryness, and purified by silica gel flash column chromatography (eluent: n-hexane/EtOAc 4:1) to give the products **2**.

### c) Experimental data of other Lewis acids

Table S1. Experimental data of other Lewis acids

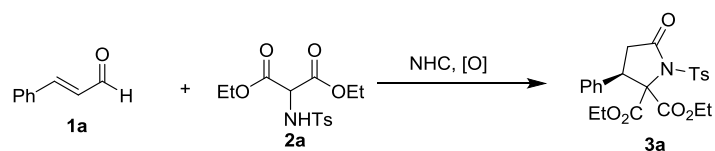

| Entry <sup>a</sup> | Lewis acid                         | Yield[%] <sup>b</sup> | ee[%] <sup>c</sup> |
|--------------------|------------------------------------|-----------------------|--------------------|
| 1                  | Cu(OTf) <sub>2</sub>               | -                     | -                  |
| 2                  | Zn(OTf) <sub>2</sub>               | 15                    | 49                 |
| 3                  | Sc(OTf) <sub>3</sub>               | 68                    | 49                 |
| 4                  | Ti(O <sup>t</sup> Pr) <sub>4</sub> | 45                    | 99                 |
| 5                  | Mg(OTf) <sub>2</sub>               | 62                    | 99                 |
| 6                  | /                                  | 88                    | 48                 |

<sup>a</sup> Standard condition: **1a** (0.3 mmol), **2a** (0.2 mmol), NHC **D** (2 mol%), NaO<sup>t</sup>Bu (0.047 mmol), K<sub>2</sub>CO<sub>3</sub> (0.093 mmol), [O] (0.24 mmol), Lewis acid (0.04 mmol), 4Å MS (100 mg), DCM (1 mL), 0 °C to rt (ice water mixture). <sup>b</sup> Isolated yields after column chromatography. <sup>c</sup> Determined by chiral HPLC.

#### d) Experimental data of other acyazolium precursors

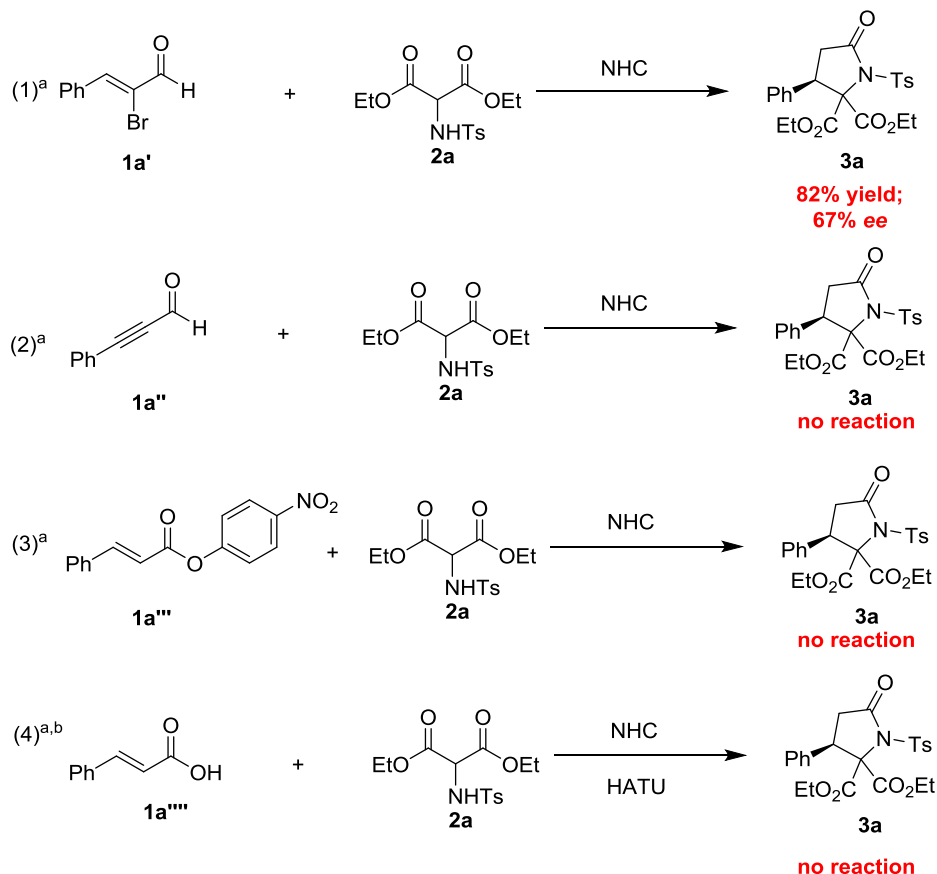

<sup>a</sup> Reaction conditions: **1** (0.3 mmol), **2a** (0.2 mmol), NHC **D** (2 mol%), NaO<sup>t</sup>Bu (0.047 mmol), K<sub>2</sub>CO<sub>3</sub> (0.093 mmol), LiCl (0.2 mmol), 4Å MS (100 mg), DCM (1 mL), 0 °C to rt (ice water mixture.); yields (after SiO<sub>2</sub> chromatography purification) were based on **1**; Determined by chiral HPLC. <sup>b</sup> HATU (0.04 mmol) was used.

Scheme S1. Experimental data of other acyazolium precursors

e) General procedure for the reactions of **1a** with **2a** to synthesize product **3** (**3a** as an example)

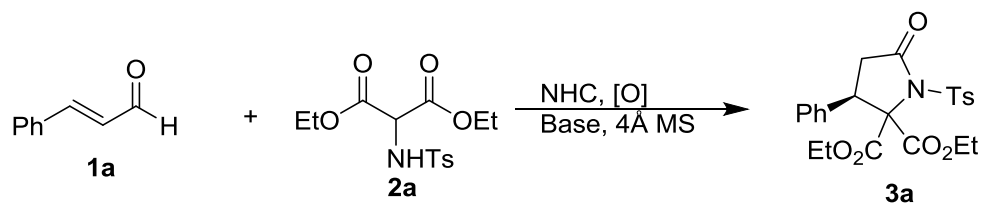

To a dried 10 mL Schlenk tube equipped with a magnetic stir bar was added **2a** (0.2 mmol, 65.8 mg), NHC **D** pre-catalyst (0.004 mmol, 1.7 mg), 3,3',5,5'-tetra-tert-butylidiphenoquinone (0.24 mmol, 98.0 mg), LiCl (0.2 mmol, 8.4 mg), NaO<sup>t</sup>Bu (0.047 mmol, 4.5 mg), K<sub>2</sub>CO<sub>3</sub> (0.093 mmol, 13.0 mg) and MS 4Å (100.0 mg). To this mixture was added dry DCM (1.0 mL), and **1a** (0.3 mmol, 38 uL) via a micro syringe, then the reaction mixture was stirred for 12h at ice-water (detected by TLC). The solvent was removed under reduced pressure, and then the residue was purified by column chromatography (silica gel, Petroleum ether/EtOAc, 5:1, v/v) to afford the product **3a**.

f) General procedure for the reactions of **3ab** to synthesize product **4** and **5** <sup>[3]</sup>

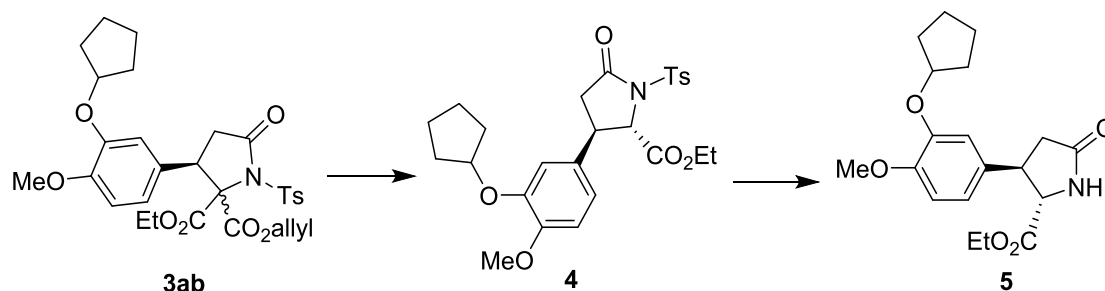

To an oven-dried, 10-mL round-bottomed flask equipped with a magnetic stir bar were added Pd<sub>2</sub>(dba)<sub>3</sub>·CHCl<sub>3</sub> (16.8 mg, 0.016 mmol, 10 mol%), PPh<sub>3</sub> (2.2 mg, 0.008 mmol, 5 mol%), HCO<sub>2</sub>NH<sub>4</sub> (20.4 mg, 0.32 mmol, 2.0 equiv) and CH<sub>3</sub>CN (2.0 mL) and the mixture was stirred at room temperature for 10 min. Compound **3ab** (93.6 mg, 0.16 mmol, 1.0 equiv) in CH<sub>3</sub>CN (2 mL) was added to the mixture, and then the reaction was heated to 90 °C with vigorous stirring for 2 h (detected by TLC). After the reaction was completed, the reaction mixture was concentrated under reduced pressure, and then purified by column chromatography (silica gel, Petroleum ether/EtOAc, 3:1, v/v) to afford the product **4**. The relative stereo-chemistry of compound **4** was assigned based on the work of Romo's group.<sup>[3]</sup>

Under Ar atmosphere, to a 25-mL round-bottomed flask equipped with a magnetic stir bar were added SmI<sub>2</sub> (5.77 mL of 0.1M in THF, 0.577 mmol, 6.0 equiv), and **4** (48.2 mg, 0.096 mmol, 1.0 equiv) at 0 °C. The reaction mixture was warmed to room temperature and stirred for 30 min (detected by TLC). After the reaction was completed, the reaction mixture was quenched with saturated NaHCO<sub>3</sub> and extracted



|                                                                    |        |
|--------------------------------------------------------------------|--------|
| _refine_ls_R_factor_gt                                             | 0.0491 |
| _refine_ls_restrained_S_all                                        | 1.031  |
| _refine_ls_shift/su_max                                            | 0.000  |
| _refine_ls_shift/su_mean                                           | 0.000  |
| _refine_ls_structure_factor_coef                                   | Fsqd   |
| _refine_ls_weighting_details                                       |        |
| 'w=1/[\s^2^(Fo^2^)+(0.0485P)^2^+0.1456P] where P=(Fo^2^+2Fc^2^)/3' |        |
| _refine_ls_weighting_scheme                                        | calc   |
| _refine_ls_wR_factor_gt                                            | 0.1202 |
| _refine_ls_wR_factor_ref                                           | 0.1275 |
| _refine_special_details                                            | ?      |
| _olex2_refinement_description                                      |        |

### III. Characterizations of products, reference

Structure of known compounds **1i**,<sup>[1]</sup> **1j**,<sup>[2]</sup> **1k**,<sup>[2]</sup> **1m**,<sup>[2]</sup> **1p**,<sup>[3]</sup> **1r**,<sup>[4]</sup> **1u-1w**,<sup>[6]</sup> **1x**,<sup>[10]</sup> **2a**,<sup>[6]</sup> **2b**,<sup>[7]</sup> **2c**,<sup>[8]</sup> **2d**,<sup>[6]</sup> **2e**,<sup>[8]</sup> **3a**,<sup>[11]</sup> **3b**,<sup>[11]</sup> **3f**,<sup>[11]</sup> **3z**<sup>[8]</sup> and **5**<sup>[12]</sup> were confirmed by NMR spectral comparison with literature data. The compounds not reported before, <sup>1</sup>H NMR and <sup>13</sup>C NMR characterization and the corresponding spectra are provided.

#### a) Characterizations of Products

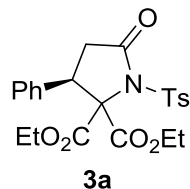

**Diethyl (R)-5-oxo-3-phenyl-1-tosylpyrrolidine-2,2-dicarboxylate (3a):** Flash column chromatography on silica gel (ethyl acetate/petroleum ether, 1:5) gave the product (81.7 mg, 89% yield) as a white solid: mp 123.0-125.2 °C;  $[\alpha]_D^{25}$  (c 0.561, CHCl<sub>3</sub>) = -66.8; <sup>1</sup>H NMR (400 MHz, CDCl<sub>3</sub>)  $\delta$  = 8.07 (d, *J* = 8.4 Hz, 2H), 7.35-7.29 (m, 5H), 7.13-7.10 (m, 2H), 4.46-4.40 (m, 2H), 4.07 (t, *J* = 8.4 Hz, 1H), 3.97-3.89 (m, 1H), 3.84-3.76 (m, 1H), 2.94-2.83 (m, 2H), 2.45 (s, 3H), 1.39 (t, *J* = 7.2 Hz, 3H), 0.95 (t, *J* = 7.2 Hz, 3H); HRMS(ESI) calcd for C<sub>23</sub>H<sub>26</sub>NO<sub>7</sub>S (M+H)<sup>+</sup>: 460.1424, Found: 460.1411; 94% *ee* as determined by HPLC (Chiralcel ASH, 90:10 hexanes/*i*-PrOH, 0.8 mL/min), tr (major) = 37.0 min, tr (minor) = 41.7 min.

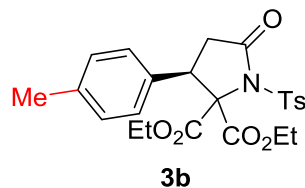

**Diethyl (R)-5-oxo-3-(p-tolyl)-1-tosylpyrrolidine-2,2-dicarboxylate (3b):** Flash column chromatography on silica gel (ethyl acetate/petroleum ether, 1:5) gave the product (87.1 mg, 92% yield) as a white solid: mp 158.4-161.8 °C;  $[\alpha]_D^{25}$  (c 0.726, CHCl<sub>3</sub>) = -41.3; <sup>1</sup>H NMR (400 MHz, CDCl<sub>3</sub>)  $\delta$  = 8.07 (d, *J* = 8.0 Hz, 2H), 7.34 (d, *J* = 8.0 Hz, 2H), 7.10 (d, *J* = 8.0 Hz, 2H), 6.99 (d, *J* = 8.0 Hz, 2H), 4.45-4.40 (m, 2H), 4.03 (t, *J* = 8.4 Hz, 1H), 3.98-3.92 (m, 1H), 3.88-3.80 (m, 1H), 2.92-2.80 (m, 2H), 2.45 (s, 3H), 2.32 (s, 3H), 1.39 (t, *J* = 7.2 Hz, 3H), 0.99 (t, *J* = 7.2 Hz, 3H); HRMS(ESI) calcd for C<sub>24</sub>H<sub>28</sub>NO<sub>7</sub>S (M+H)<sup>+</sup>: 474.1581, Found: 474.1570; 92% *ee* as determined by HPLC (Chiralcel ASH, 90:10 hexanes/*i*-PrOH, 1.0 mL/min), tr (major) = 42.6 min, tr (minor) = 51.4 min.

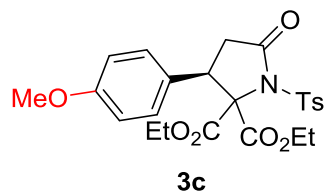

**Diethyl (R)-3-(4-methoxyphenyl)-5-oxo-1-tosylpyrrolidine-2,2-dicarboxylate (3c):** Flash column chromatography on silica gel (ethyl acetate/petroleum ether, 1:5) gave the product (84.1 mg, 86% yield) as a white solid: mp 125.6-128.4 °C;  $[\alpha]_D^{25}$  (c 0.583,



CHCl<sub>3</sub>) = -64.3; <sup>1</sup>H NMR (400 MHz, CDCl<sub>3</sub>) δ = 8.07 (d, *J* = 8.0 Hz, 2H), 7.34 (d, *J* = 8.0 Hz, 2H), 7.04 (d, *J* = 8.8 Hz, 2H), 6.82 (d, *J* = 8.8 Hz, 2H), 4.46-4.38 (m, 2H), 4.03-3.94 (m, 2H), 3.90-3.82 (m, 1H), 3.78 (s, 3H), 2.91 - 2.80 (m, 2H), 2.45 (s, 3H), 1.39 (t, *J* = 7.2 Hz, 3H), 0.99 (t, *J* = 7.2 Hz, 3H); <sup>13</sup>C NMR (100 MHz, CDCl<sub>3</sub>) δ = 172.4, 167.3, 165.2, 159.8, 145.4, 135.4, 130.1, 129.6, 129.1, 127.2, 113.9, 77.5, 63.2, 62.7, 55.4, 46.4, 36.6, 21.8, 14.1, 13.7; HRMS(ESI) calcd for C<sub>24</sub>H<sub>28</sub>NO<sub>8</sub>S (M+H)<sup>+</sup>: 490.1530, Found: 490.1521; 89% *ee* as determined by HPLC (Chiralcel ASH, 85:15 hexanes/*i*-PrOH, 1.0 mL/min), tr (major) = 32.8 min, tr (minor) = 45.8 min.

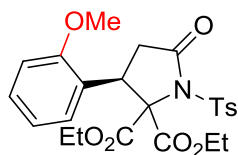

**3d**

**Diethyl (*R*)-3-(2-methoxyphenyl)-5-oxo-1-tosylpyrrolidine-2,2-dicarboxylate (3d):**

Flash column chromatography on silica gel (ethyl acetate/petroleum ether, 1:5) gave the product (96.9 mg, 99% yield) as a white solid: mp 153.1-154.2 °C; [α]<sub>D</sub><sup>25</sup> (c 0.549, CHCl<sub>3</sub>) = -31.9; <sup>1</sup>H NMR (400 MHz, CDCl<sub>3</sub>) δ = 8.09 (d, *J* = 8.4 Hz, 2H), 7.33 (d, *J* = 8.0 Hz, 2H), 7.28-7.24 (m, 1H), 7.00 (dd, *J* = 7.2, 1.2 Hz, 1H), 6.86 (t, *J* = 7.6 Hz, 1H), 6.81 (d, *J* = 8.0 Hz, 1H), 4.45-4.34 (m, 3H), 3.98-3.90 (m, 1H), 3.73-3.65 (m, 1H), 3.55 (s, 3H), 2.89-2.76 (m, 2H), 2.44 (s, 3H), 1.39 (t, *J* = 6.8 Hz, 3H), 0.99 (t, *J* = 7.2 Hz, 3H); <sup>13</sup>C NMR (100 MHz, CDCl<sub>3</sub>) δ = 172.9, 167.3, 165.3, 158.1, 145.1, 135.7, 130.2, 129.9, 129.1, 128.9, 124.5, 120.4, 110.8, 77.1, 63.0, 62.4, 54.9, 42.6, 35.8, 21.8, 14.0, 13.6; HRMS(ESI) calcd for C<sub>24</sub>H<sub>28</sub>NO<sub>8</sub>S (M+H)<sup>+</sup>: 490.1530, Found: 490.1522; 90% *ee* as determined by HPLC (Chiralcel AD, 85:15 hexanes/*i*-PrOH, 1.0 mL/min), tr (major) = 18.4 min, tr (minor) = 25.3 min.

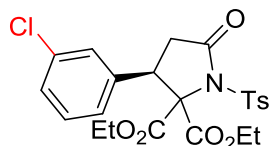

**3e**

**Diethyl (*R*)-3-(3-chlorophenyl)-5-oxo-1-tosylpyrrolidine-2,2-dicarboxylate (3e):**

Flash column chromatography on silica gel (ethyl acetate/petroleum ether, 1:5) gave the product (64.1 mg, 65% yield) as a white solid: mp 157.1-158.4 °C; [α]<sub>D</sub><sup>25</sup> (c 0.423, CHCl<sub>3</sub>) = -47.2; <sup>1</sup>H NMR (400 MHz, CDCl<sub>3</sub>) δ = 8.07 (d, *J* = 8.4 Hz, 2H), 7.47-7.44 (m, 1H), 7.35 (d, *J* = 8.4 Hz, 2H), 7.27-7.26 (m, 1H), 7.18 (t, *J* = 8.0 Hz, 1H), 7.05 (d, *J* = 7.6 Hz, 1H), 4.44 (q, *J* = 7.2 Hz, 2H), 4.06-3.97 (m, 2H), 3.95-3.87 (m, 1H), 2.85 (d, *J* = 8.4 Hz, 2H), 2.45 (s, 3H), 1.40 (t, *J* = 7.2 Hz, 3H), 1.04 (t, *J* = 7.2 Hz, 3H); <sup>13</sup>C NMR (100 MHz, CDCl<sub>3</sub>) δ = 171.7, 167.1, 165.0, 145.5, 137.8, 135.3, 131.8, 131.6, 130.2, 130.0, 129.1, 127.2, 122.6, 77.3, 63.5, 62.9, 46.3, 36.2, 21.9, 14.1, 13.6; HRMS(ESI) calcd for C<sub>23</sub>H<sub>25</sub>ClNO<sub>7</sub>S (M+H)<sup>+</sup>: 494.1035, Found: 494.1027; 90% *ee* as determined by HPLC (Chiralcel ODH, 85:Q5 hexanes/*i*-PrOH, 1.0 mL/min), tr (major) = 40.8 min, tr (minor) = 31.5 min.

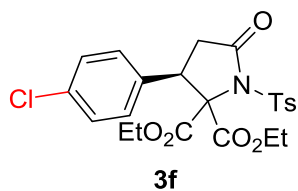

**Diethyl (R)-3-(4-chlorophenyl)-5-oxo-1-tosylpyrrolidine-2,2-dicarboxylate (3f):**

Flash column chromatography on silica gel (ethyl acetate/petroleum ether, 1:5) gave the product (54.3 mg, 55% yield) as a white solid: mp 160.0-161.9 °C;  $[\alpha]_D^{25}$  (c 0.290, CHCl<sub>3</sub>) = -60.3; <sup>1</sup>H NMR (400 MHz, CDCl<sub>3</sub>)  $\delta$  = 8.06 (d, *J* = 8.4 Hz, 2H), 7.34 (d, *J* = 8.4 Hz, 2H), 7.28 (d, *J* = 8.4 Hz, 2H), 7.06 (d, *J* = 8.4 Hz, 2H), 4.43 (q, *J* = 6.0 Hz, 2H), 4.05 (t, *J* = 8.4 Hz, 1H), 4.01-3.95 (m, 1H), 3.91-3.83 (m, 1H), 2.91-2.79 (m, 2H), 2.45 (s, 3H), 1.40 (t, *J* = 7.2 Hz, 3H), 1.03 (t, *J* = 7.2 Hz, 3H); HRMS(ESI) calcd for C<sub>23</sub>H<sub>25</sub>ClNO<sub>7</sub>S (M+H)<sup>+</sup>: 494.1035, Found: 494.1027; 93% *ee* as determined by HPLC (Chiralcel AD, 85:15 hexanes/*i*-PrOH, 1.0 mL/min), *tr* (major) = 24.2 min, *tr* (minor) = 22.6 min.

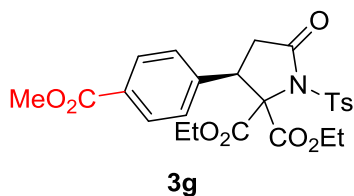

**Diethyl**

**(R)-3-(4-(methoxycarbonyl)phenyl)-5-oxo-1-tosylpyrrolidine-2,2-dicarboxylate (3g):**

Flash column chromatography on silica gel (ethyl acetate/petroleum ether, 1:5) gave the product (88.0 mg, 85% yield) as a white solid: mp 140.9-143.5 °C;  $[\alpha]_D^{25}$  (c 0.568, CHCl<sub>3</sub>) = -35.2; <sup>1</sup>H NMR (400 MHz, CDCl<sub>3</sub>)  $\delta$  = 8.07 (d, *J* = 8.0 Hz, 2H), 7.97 (d, *J* = 8.0 Hz, 2H), 7.35 (d, *J* = 8.0 Hz, 2H), 7.20 (d, *J* = 8.4 Hz, 2H), 4.44 (q, *J* = 7.2 Hz, 2H), 4.14 (t, *J* = 8.0 Hz, 1H), 4.00-3.91 (m, 4H), 3.86-3.78 (m, 1H), 2.89 (d, *J* = 8.0 Hz, 2H), 2.46 (s, 3H), 1.40 (t, *J* = 7.2 Hz, 3H), 0.98 (t, *J* = 6.8 Hz, 3H); <sup>13</sup>C NMR (100 MHz, CDCl<sub>3</sub>)  $\delta$  = 171.8, 167.1, 166.5, 165.0, 145.5, 140.8, 135.3, 130.4, 130.0, 129.8, 129.1, 128.6, 77.3, 63.5, 62.8, 52.4, 46.6, 36.3, 21.9, 14.1, 13.6; HRMS(ESI) calcd for C<sub>25</sub>H<sub>28</sub>NO<sub>9</sub>S (M+H)<sup>+</sup>: 518.1479, Found: 532.1471; 95% *ee* as determined by HPLC (Chiralcel IA, 85:15 hexanes/*i*-PrOH, 1.0 mL/min), *tr* (major) = 47.3 min, *tr* (minor) = 33.1 min.

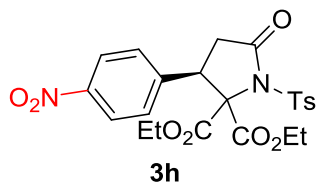

**Diethyl (R)-3-(4-nitrophenyl)-5-oxo-1-tosylpyrrolidine-2,2-dicarboxylate (3h):**

Flash column chromatography on silica gel (ethyl acetate/petroleum ether, 1:3) gave the product (69.6 mg, 69% yield) as a white solid: mp 53.1-55.2 °C;  $[\alpha]_D^{25}$  (c 0.915, CHCl<sub>3</sub>) = 30.1; <sup>1</sup>H NMR (400 MHz, CDCl<sub>3</sub>)  $\delta$  = 8.16 (d, *J* = 8.4 Hz, 2H), 8.06 (d, *J* = 8.0 Hz, 2H), 7.36 (d, *J* = 8.4 Hz, 2H), 7.31 (d, *J* = 8.8 Hz, 2H), 4.45 (q, *J* = 6.8 Hz, 2H), 4.20 (t, *J* = 8.0 Hz, 1H), 4.06-3.98 (m, 1H), 3.93-3.85 (m, 1H), 2.97-2.83 (m,

2H), 2.47 (s, 3H), 1.41 (t,  $J = 7.2$  Hz, 3H), 1.03 (t,  $J = 7.2$  Hz, 3H);  $^{13}\text{C}$  NMR (100 MHz,  $\text{CDCl}_3$ )  $\delta = 171.3, 167.0, 164.9, 145.7, 143.1, 135.1, 130.0, 129.6, 129.2, 123.7, 77.1, 63.8, 63.1, 46.2, 36.3, 21.9, 14.0, 13.7$ ; HRMS(ESI) calcd for  $\text{C}_{23}\text{H}_{25}\text{N}_2\text{O}_9\text{S}$  ( $\text{M}+\text{H}$ ) $^+$ : 505.1275, Found: 505.1266; 89% *ee* as determined by HPLC (Chiralcel AD, 85:15 hexanes/*i*-PrOH, 1.0 mL/min), tr (major) = 58.9 min, tr (minor) = 42.6 min.

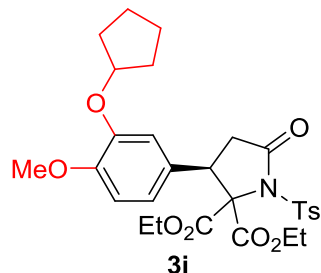

### Diethyl

**(*R*)-3-(3-(cyclopentyloxy)-4-methoxyphenyl)-5-oxo-1-tosylpyrrolidine-2,2-dicarboxylate (3i):** Flash column chromatography on silica gel (ethyl acetate/petroleum ether, 1:5) gave the product (91.7 mg, 77% yield) as a colorless oil;  $[\alpha]_{\text{D}}^{25}$  (c 0.448,  $\text{CHCl}_3$ ) = -83.8;  $^1\text{H}$  NMR (400 MHz,  $\text{CDCl}_3$ )  $\delta = 8.08$  (d,  $J = 8.0$  Hz, 2H), 7.33 (d,  $J = 8.4$  Hz, 2H), 6.74 (d,  $J = 8.4$  Hz, 1H), 6.63 (dd,  $J = 8.4, 2.0$  Hz, 1H), 6.55 (d,  $J = 2.0$  Hz, 1H), 4.52-4.48 (m, 1H), 4.46-4.38 (m, 2H), 4.01-3.93 (m, 2H), 3.85-3.77 (m, 4H), 2.93 (dd,  $J = 17.2, 8.8$  Hz, 1H), 2.78 (dd,  $J = 17.2, 7.2$  Hz, 1H), 2.44 (s, 3H), 1.79-1.76 (m, 6H), 1.54 (d,  $J = 4.8$  Hz, 2H), 1.40 (t,  $J = 7.2$  Hz, 3H), 0.99 (t,  $J = 7.2$  Hz, 3H);  $^{13}\text{C}$  NMR (100 MHz,  $\text{CDCl}_3$ )  $\delta = 172.5, 167.5, 165.0, 150.4, 150.1, 145.3, 142.2, 140.7, 135.6, 134.2, 130.0, 129.1, 127.6, 127.0, 126.9, 123.1, 123.0, 120.0, 119.5, 77.8, 63.3, 62.5, 56.2, 47.3, 36.8, 32.7, 32.6, 21.9, 14.1, 13.7, 8.5, 8.4$ ; HRMS(ESI) calcd for  $\text{C}_{29}\text{H}_{35}\text{NNaO}_9\text{S}$  ( $\text{M}+\text{Na}$ ) $^+$ : 596.1925, Found: 596.1933; 89% *ee* as determined by HPLC (Chiralcel ODH, 90:10 hexanes/*i*-PrOH, 1.0 mL/min), tr (major) = 26.2 min, tr (minor) = 32.7 min.

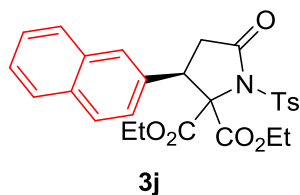

**Diethyl (*R*)-3-(naphthalen-2-yl)-5-oxo-1-tosylpyrrolidine-2,2-dicarboxylate (3j):** Flash column chromatography on silica gel (ethyl acetate/petroleum ether, 1:5) gave the product (85.6 mg, 84% yield) as a white solid: mp 128.9-130.6  $^{\circ}\text{C}$ ;  $[\alpha]_{\text{D}}^{25}$  (c 0.713,  $\text{CHCl}_3$ ) = -38.6;  $^1\text{H}$  NMR (400 MHz,  $\text{CDCl}_3$ )  $\delta = 8.09$  (d,  $J = 8.4$  Hz, 2H), 7.82-7.72 (m, 3H), 7.58 (s, 1H), 7.51-7.48 (m, 2H), 7.36 (d,  $J = 8.4$  Hz, 2H), 7.23-7.19 (m, 1H), 4.47 (q,  $J = 7.2$  Hz, 2H), 4.26 (t,  $J = 8.4$  Hz, 1H), 3.89-3.81 (m, 1H), 3.75-3.67 (m, 1H), 3.06-2.92 (m, 2H), 2.47 (s, 1H), 1.42 (t,  $J = 7.2$  Hz, 3H), 0.78 (t,  $J = 7.2$  Hz, 3H);  $^{13}\text{C}$  NMR (100 MHz,  $\text{CDCl}_3$ )  $\delta = 172.3, 167.3, 165.2, 145.4, 135.4, 133.2, 133.1, 133.0, 130.1, 129.1, 128.4, 127.9, 127.8, 127.7, 126.8, 126.7, 125.9, 77.6, 63.4, 62.7, 47.1, 36.5, 21.9, 14.1, 13.4$ ; HRMS(ESI) calcd for  $\text{C}_{27}\text{H}_{28}\text{NO}_7\text{S}$  ( $\text{M}+\text{H}$ ) $^+$ : 510.1581, Found: 510.1574; 92% *ee* as determined by HPLC (Chiralcel AsH, 90:10 hexanes/*i*-PrOH, 1.0 mL/min), tr (major) = 42.6 min, tr (minor) = 51.4 min.

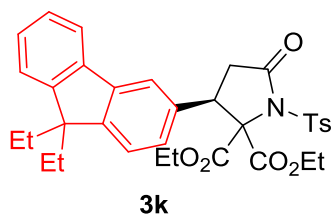

**Diethyl (*R*)-3-(9,9-diethyl-9H-fluoren-3-yl)-5-oxo-1-tosylpyrrolidine-2,2-dicarboxylate (3k):** Flash column chromatography on silica gel (ethyl acetate/petroleum ether, 1:5) gave the product (112.2 mg, 93% yield) as a white solid: mp 143.5-145.9 °C;  $[\alpha]_D^{25}$  (c 0.768, CHCl<sub>3</sub>) = -48.9; <sup>1</sup>H NMR (400 MHz, CDCl<sub>3</sub>)  $\delta$  = 8.10 (d, *J* = 8.4 Hz, 2H), 7.69-7.66 (m, 1H), 7.61 (d, *J* = 8.0 Hz, 1H), 7.36-7.31 (m, 5H), 7.07 (dd, *J* = 8.0, 1.6 Hz, 1H), 7.02 (s, 1H), 4.50-4.40 (m, 2H), 4.16 (t, *J* = 8.4 Hz, 1H), 4.03-3.95 (m, 1H), 3.82-3.74 (m, 1H), 2.95 (d, *J* = 8.4 Hz, 2H), 2.46 (s, 3H), 2.00-1.86 (m, 4H), 1.41 (t, *J* = 7.2 Hz, 3H), 0.99 (t, *J* = 7.2 Hz, 3H), 0.27 (q, *J* = 7.6 Hz, 6H); <sup>13</sup>C NMR (100 MHz, CDCl<sub>3</sub>)  $\delta$  = 172.5, 167.5, 165.0, 150.4, 150.1, 145.3, 142.2, 140.7, 135.6, 134.2, 130.0, 129.1, 127.6, 127.0, 126.9, 123.1, 123.0, 120.0, 119.5, 77.8, 63.3, 62.5, 56.2, 47.3, 36.8, 32.7, 32.6, 21.9, 14.1, 13.7, 8.6, 8.5; HRMS(ESI) calcd for C<sub>34</sub>H<sub>38</sub>NO<sub>7</sub>S (M+H)<sup>+</sup>: 604.2363, Found: 604.2360; 89% *ee* as determined by HPLC (Chiralcel AD, 90:10 hexanes/*i*-PrOH, 0.8 mL/min), tr (major) = 23.0 min, tr (minor) = 25.3 min.

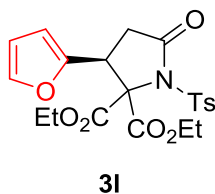

**Diethyl (*S*)-3-(furan-2-yl)-5-oxo-1-tosylpyrrolidine-2,2-dicarboxylate (3l):** Flash column chromatography on silica gel (ethyl acetate/petroleum ether, 1:5) gave the product (81.8 mg, 91% yield) as a white solid: mp 108.3-109.4 °C;  $[\alpha]_D^{25}$  (c 0.414, CHCl<sub>3</sub>) = -96.6; <sup>1</sup>H NMR (400 MHz, CDCl<sub>3</sub>)  $\delta$  = 8.05 (d, *J* = 8.4 Hz, 2H), 7.36-7.35 (m, 1H), 7.33 (d, *J* = 8.0 Hz, 2H), 6.33 (dd, *J* = 3.2, 2.0 Hz, 1H), 6.19 (d, *J* = 3.2 Hz, 1H), 4.43 (q, *J* = 7.2 Hz, 2H), 4.19 (t, *J* = 9.2 Hz, 1H), 4.22-4.10 (m, 1H), 4.06-3.98 (m, 1H), 2.92 (dd, *J* = 17.2, 10.0 Hz, 1H), 2.76 (dd, *J* = 16.8, 8.4 Hz, 1H), 2.44 (s, 3H), 1.40 (t, *J* = 7.2 Hz, 3H), 1.14 (t, *J* = 7.2 Hz, 3H); <sup>13</sup>C NMR (100 MHz, CDCl<sub>3</sub>)  $\delta$  = 171.2, 166.8, 165.1, 148.6, 145.4, 143.0, 135.3, 130.0, 129.1, 110.8, 109.2, 76.2, 63.4, 63.0, 41.3, 34.3, 21.8, 14.0, 13.7; HRMS(ESI) calcd for C<sub>21</sub>H<sub>24</sub>NO<sub>8</sub>S (M+H)<sup>+</sup>: 450.1217, Found: 450.1210; 87% *ee* as determined by HPLC (Chiralcel ASH, 90:10 hexanes/*i*-PrOH, 1.0 mL/min), tr (major) = 36.6 min, tr (minor) = 42.5 min.

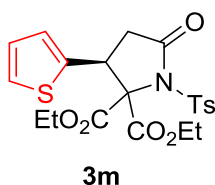

**Diethyl (*S*)-5-oxo-3-(thiophen-2-yl)-1-tosylpyrrolidine-2,2-dicarboxylate (3m):** Flash column chromatography on silica gel (ethyl acetate/petroleum ether, 1:5) gave

the product (77.2 mg, 83% yield) as a white solid: mp 113.6-115.9 °C;  $[\alpha]_D^{25}$  (c 0.493, CHCl<sub>3</sub>) = -81.2; <sup>1</sup>H NMR (400 MHz, CDCl<sub>3</sub>)  $\delta$  = 8.05 (d,  $J$  = 8.4 Hz, 2H), 7.34 (d,  $J$  = 8.4 Hz, 2H), 7.26-7.27 (m, 1H), 6.92-6.98 (m, 2H), 4.41-4.48 (m, 2H), 4.30 (t,  $J$  = 9.2 Hz, 1H), 3.94-4.11 (m, 2H), 2.98 (dd,  $J$  = 16.8, 10.4 Hz, 1H), 2.89 (dd,  $J$  = 16.8, 8.8 Hz, 1H), 2.44 (s, 3H), 1.41 (t,  $J$  = 7.2 Hz, 3H), 1.07 (t,  $J$  = 7.2 Hz, 3H); <sup>13</sup>C NMR (100 MHz, CDCl<sub>3</sub>)  $\delta$  = 171.2, 167.0, 165.1, 145.5, 137.4, 135.2, 130.0, 129.0, 127.3, 127.1, 126.0, 77.0, 63.4, 62.9, 42.5, 37.6, 21.9, 14.1, 13.7; HRMS(ESI) calcd for C<sub>21</sub>H<sub>24</sub>NO<sub>7</sub>S<sub>2</sub>(M+H)<sup>+</sup>: 466.0989, Found: 466.0979; 88% *ee* as determined by HPLC (Chiralcel ASH, 90:10 hexanes/*i*-PrOH, 1.0 mL/min), tr (major) = 36.2 min, tr (minor) = 41.9 min.

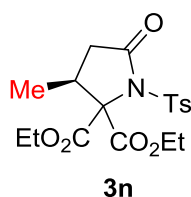

**Diethyl (S)-3-methyl-5-oxo-1-tosylpyrrolidine-2,2-dicarboxylate (3n):** Flash column chromatography on silica gel (ethyl acetate/petroleum ether, 1:10) gave the product (56.4 mg, 71% yield) as a white solid: mp 95.5-97.3 °C;  $[\alpha]_D^{25}$  (c 0.379, CHCl<sub>3</sub>) = -343.0; <sup>1</sup>H NMR (400 MHz, CDCl<sub>3</sub>)  $\delta$  = 8.04 (d,  $J$  = 7.6 Hz, 2H), 7.31 (d,  $J$  = 8.0 Hz, 2H), 4.40-4.30 (m, 4H), 2.78-2.69 (m, 1H), 2.55 (dd,  $J$  = 16.8, 8.0 Hz, 1H), 2.42 (s, 3H), 2.32 (dd,  $J$  = 16.8, 10.4 Hz, 1H), 1.37-1.32 (m, 6H), 1.19 (d,  $J$  = 6.8 Hz, 3H); <sup>13</sup>C NMR (100 MHz, CDCl<sub>3</sub>)  $\delta$  = 172.5, 167.4, 165.8, 145.3, 135.4, 129.9, 129.0, 76.2, 62.9, 62.8, 38.2, 36.9, 21.8, 15.7, 14.2; HRMS(ESI) calcd for C<sub>18</sub>H<sub>24</sub>NO<sub>7</sub>S (M+H)<sup>+</sup>: 398.1268, Found: 398.1259; 98% *ee* as determined by HPLC (Chiralcel AD, 85:15 hexanes/*i*-PrOH, 1.0 mL/min), tr (major) = 12.1 min, tr (minor) = 14.6 min.

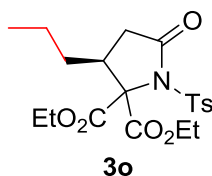

**Diethyl (S)-5-oxo-3-propyl-1-tosylpyrrolidine-2,2-dicarboxylate (3o):** Flash column chromatography on silica gel (ethyl acetate/petroleum ether, 1:10) gave the product (62.9 mg, 74% yield) as a white solid: mp 136.0-137.5 °C;  $[\alpha]_D^{25}$  (c 0.390, CHCl<sub>3</sub>) = -89.7; <sup>1</sup>H NMR (400 MHz, CDCl<sub>3</sub>)  $\delta$  = 8.04 (d,  $J$  = 8.4 Hz, 2H), 7.32 (d,  $J$  = 8.0 Hz, 2H), 4.41-4.33 (m, 4H), 2.63-2.52 (m, 2H), 2.43 (s, 3H), 2.33 (td,  $J$  = 14.4, 4.4 Hz, 1H), 1.85-1.80 (m, 1H), 1.36 (td,  $J$  = 7.2, 2.8 Hz, 7H), 1.29-1.20 (m, 2H), 0.90 (t,  $J$  = 6.8 Hz, 3H); <sup>13</sup>C NMR (100 MHz, CDCl<sub>3</sub>)  $\delta$  = 172.4, 167.4, 165.9, 145.3, 135.4, 129.9, 129.0, 75.8, 62.9, 62.8, 42.0, 36.5, 32.5, 21.8, 20.8, 14.1, 14.0, 13.9; HRMS(ESI) calcd for C<sub>20</sub>H<sub>27</sub>NNaO<sub>7</sub>S (M+Na)<sup>+</sup>: 448.1400, Found: 448.1454; 99% *ee* as determined by HPLC (Chiralcel ASH, 85:15 hexanes/*i*-PrOH, 1.0 mL/min), tr (major) = 16.7 min, tr (minor) = 19.5 min.

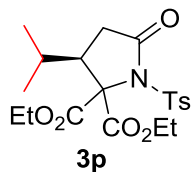

**Diethyl (R)-3-isopropyl-5-oxo-1-tosylpyrrolidine-2,2-dicarboxylate (3p):** Flash column chromatography on silica gel (ethyl acetate/petroleum ether, 1:10) gave the product (49.3 mg, 58% yield) as a white solid: mp 79.2-80.4 °C;  $[\alpha]_D^{25}$  (c 0.346, CHCl<sub>3</sub>) = -28.9; <sup>1</sup>H NMR (400 MHz, CDCl<sub>3</sub>)  $\delta$  = 7.96 (d, *J* = 8.4 Hz, 2H), 7.30 (d, *J* = 8.4 Hz, 2H), 4.43-4.27 (m, 4H), 2.61-2.54 (m, 1H), 2.48 (dd, *J* = 16.8, 7.6 Hz, 1H), 2.41 (s, 3H), 2.23 (dd, *J* = 16.8, 12.4 Hz, 1H), 1.77-1.70 (m, 1H), 1.34 (td, *J* = 11.2, 7.2 Hz, 6H), 1.02 (d, *J* = 6.4 Hz, 3H), 0.83 (d, *J* = 6.4 Hz, 3H); <sup>13</sup>C NMR (100 MHz, CDCl<sub>3</sub>)  $\delta$  = 172.1, 167.8, 165.6, 145.3, 135.4, 129.6, 129.1, 75.9, 63.2, 62.9, 50.8, 35.3, 29.5, 21.8, 21.3, 21.1, 14.0, 13.9; HRMS(ESI) calcd for C<sub>20</sub>H<sub>28</sub>NO<sub>7</sub>S (M+H)<sup>+</sup>: 426.1581, Found: 426.1589; 98% *ee* as determined by HPLC (Chiralcel AD, 85:15 hexanes/*i*-PrOH, 1.0 mL/min), tr (major) = 12.7 min, tr (minor) = 11.5 min.

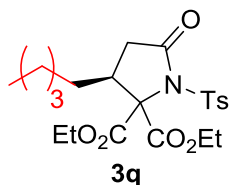

**Diethyl (S)-5-oxo-3-pentyl-1-tosylpyrrolidine-2,2-dicarboxylate (3q):** Flash column chromatography on silica gel (ethyl acetate/petroleum ether, 1:10) gave the product (77.0 mg, 85% yield) as a white solid: mp 71.6-74.6 °C;  $[\alpha]_D^{25}$  (c 0.142, CHCl<sub>3</sub>) = -228.9; <sup>1</sup>H NMR (400 MHz, CDCl<sub>3</sub>)  $\delta$  = 8.04 (d, *J* = 8.4 Hz, 2H), 7.32 (d, *J* = 8.0 Hz, 2H), 4.41-4.32 (m, 4H), 2.59-2.52 (m, 2H), 2.43 (s, 3H), 2.33 (dd, *J* = 19.2, 13.6 Hz, 1H), 1.85 (s, 1H), 1.35 (td, *J* = 7.2, 1.6 Hz, 6H), 1.28-1.23 (m, 7H), 0.86 (t, *J* = 6.4 Hz, 3H); <sup>13</sup>C NMR (100 MHz, CDCl<sub>3</sub>)  $\delta$  = 172.4, 167.5, 165.9, 145.3, 135.4, 129.9, 129.0, 75.8, 62.9, 62.8, 42.2, 36.5, 31.5, 30.3, 27.2, 22.4, 21.8, 14.2, 14.1, 14.0; HRMS(ESI) calcd for C<sub>22</sub>H<sub>31</sub>NNaO<sub>7</sub>S (M+Na)<sup>+</sup>: 476.1713, Found: 476.1702; 96% *ee* as determined by HPLC (Chiralcel AD, 85:15 hexanes/*i*-PrOH, 1.0 mL/min), tr (major) = 11.1 min, tr (minor) = 12.5 min.

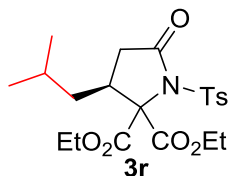

**Diethyl (S)-3-isobutyl-5-oxo-1-tosylpyrrolidine-2,2-dicarboxylate (3r):** Flash column chromatography on silica gel (ethyl acetate/petroleum ether, 1:10) gave the product (61.5 mg, 70% yield) as a white solid: mp 79.2-80.4 °C;  $[\alpha]_D^{25}$  (c 0.457, CHCl<sub>3</sub>) = -60.2; <sup>1</sup>H NMR (400 MHz, CDCl<sub>3</sub>)  $\delta$  = 8.03 (d, *J* = 8.4 Hz, 2H), 7.31 (d, *J* = 8.4 Hz, 2H), 4.35 (q, *J* = 7.2 Hz, 4H), 2.68-2.59 (m, 1H), 2.53 (dd, *J* = 16.8, 8.4 Hz, 1H), 2.41 (s, 3H), 2.32 (dd, *J* = 16.8, 11.6 Hz, 1H), 1.67-1.60 (m, 1H), 1.54-1.45 (m, 1H), 1.34 (td, *J* = 7.2, 4.0 Hz, 6H), 1.24-1.17 (m, 1H), 0.89 (d, *J* = 6.4 Hz, 3H), 0.81 (d, *J* = 6.4 Hz, 3H); <sup>13</sup>C NMR (100 MHz, CDCl<sub>3</sub>)  $\delta$  = 172.5, 167.4,

165.9, 145.3, 135.4, 129.9, 129.0, 75.7, 62.8, 40.1, 39.3, 36.6, 26.0, 23.6, 21.8, 21.3, 14.1, 14.0; HRMS(ESI) calcd for  $C_{21}H_{30}NO_7S$  ( $M+H$ )<sup>+</sup>: 440.1737, Found: 440.1729; 95% *ee* as determined by HPLC (Chiralcel ODH, 90:10 hexanes/*i*-PrOH, 0.8 mL/min), *tr* (major) = 14.8 min, *tr* (minor) = 18.0 min.

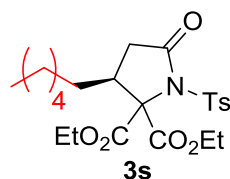

**Diethyl (S)-3-hexyl-5-oxo-1-tosylpyrrolidine-2,2-dicarboxylate (3s):** Flash column chromatography on silica gel (ethyl acetate/petroleum ether, 1:10) gave the product (78.5 mg, 84% yield) as a colorless oil;  $[\alpha]_D^{25}$  (c 0.579,  $CHCl_3$ ) = -64.8;  $^1H$  NMR (400 MHz,  $CDCl_3$ )  $\delta$  = 8.00 (d,  $J$  = 8.4 Hz, 2H), 7.29 (d,  $J$  = 8.4 Hz, 2H), 4.37-4.29 (m, 4H), 2.56-2.49 (m, 2H), 2.39 (s, 3H), 2.34-2.25 (m, 1H), 1.85-1.82 (m, 1H), 1.32 (td,  $J$  = 6.8, 1.2 Hz, 6H), 1.25-1.20 (m, 9H), 0.83 (td,  $J$  = 6.8 Hz, 3H);  $^{13}C$  NMR (100 MHz,  $CDCl_3$ )  $\delta$  = 172.5, 167.4, 165.9, 145.3, 135.4, 129.9, 129.0, 75.8, 62.9, 62.8, 42.1, 36.5, 31.6, 30.4, 29.0, 27.5, 22.6, 21.8, 14.2, 14.1, 14.0; HRMS(ESI) calcd for  $C_{23}H_{34}NO_7S$  ( $M+H$ )<sup>+</sup>: 468.2050, Found: 468.2055; 93% *ee* as determined by HPLC (Chiralcel IA, 85:15 hexanes/*i*-PrOH, 1.0 mL/min), *tr* (major) = 9.9 min, *tr* (minor) = 10.8 min.

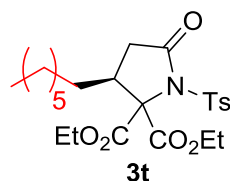

**Diethyl (S)-3-heptyl-5-oxo-1-tosylpyrrolidine-2,2-dicarboxylate (3t):** Flash column chromatography on silica gel (ethyl acetate/petroleum ether, 1:10) gave the product (78.9 mg, 82% yield) as a colorless oil;  $[\alpha]_D^{25}$  (c 0.628,  $CHCl_3$ ) = -63.7;  $^1H$  NMR (400 MHz,  $CDCl_3$ )  $\delta$  = 8.02 (d,  $J$  = 8.4 Hz, 2H), 7.30 (d,  $J$  = 8.4 Hz, 2H), 4.41-4.27 (m, 4H), 2.57-5.51 (m, 2H), 2.41 (s, 3H), 2.31 (dd,  $J$  = 19.6, 14.0 Hz, 1H), 1.86-1.73 (m, 1H), 1.35-1.31 (m, 6H), 1.27-1.22 (m, 11H), 0.85 (t,  $J$  = 6.4 Hz, 3H);  $^{13}C$  NMR (100 MHz,  $CDCl_3$ )  $\delta$  = 172.4, 167.4, 165.8, 145.3, 135.4, 129.9, 129.0, 75.8, 62.9, 62.8, 42.2, 36.5, 31.9, 31.8, 31.7, 30.4, 29.2, 29.1, 27.5, 22.6, 21.8, 14.1, 14.0; HRMS(ESI) calcd for  $C_{24}H_{36}NO_7S$  ( $M+H$ )<sup>+</sup>: 482.2207, Found: 482.2210; 95% *ee* as determined by HPLC (Chiralcel IB, 90:10 hexanes/*i*-PrOH, 1.0 mL/min), *tr* (major) = 11.0 min, *tr* (minor) = 12.6 min.

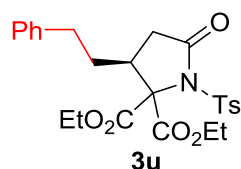

**Diethyl (S)-5-oxo-3-phenethyl-1-tosylpyrrolidine-2,2-dicarboxylate (3u):** Flash column chromatography on silica gel (ethyl acetate/petroleum ether, 1:10) gave the product (76.0 mg, 78% yield) as a colorless oil;  $[\alpha]_D^{25}$  (c 0.542,  $CHCl_3$ ) = -83.0;  $^1H$



NMR (400 MHz, CDCl<sub>3</sub>)  $\delta$  = 8.03 (d,  $J$  = 8.4 Hz, 2H), 7.31 (d,  $J$  = 8.0 Hz, 2H), 7.27-7.24 (m, 2H), 7.20-7.16 (m, 1H), 7.11-7.09 (m, 2H), 4.40-4.18 (m, 4H), 2.76-2.69 (m, 1H), 2.58-2.48 (m, 3H), 2.44-2.34 (m, 4H), 2.29-2.20 (m, 1H), 1.64-1.55 (m, 1H), 1.35 (t,  $J$  = 7.2 Hz, 3H), 1.25 (t,  $J$  = 7.2 Hz, 3H); <sup>13</sup>C NMR (100 MHz, CDCl<sub>3</sub>)  $\delta$  = 172.2, 167.2, 165.9, 145.3, 140.0, 135.4, 129.9, 129.0, 128.7, 128.3, 126.6, 75.6, 63.0, 62.9, 40.9, 36.3, 33.4, 31.8, 21.8, 14.2, 14.0; HRMS(ESI) calcd for C<sub>25</sub>H<sub>30</sub>NO<sub>7</sub>S (M+H)<sup>+</sup>: 488.1737, Found: 488.1746; 99% *ee* as determined by HPLC (Chiralcel ID, 85:15 hexanes/*i*-PrOH, 1.0 mL/min), tr (major) = 48.2 min, tr (minor) = 36.3 min.

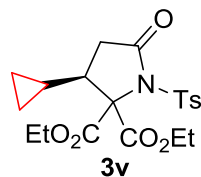

**Diethyl (R)-3-cyclopropyl-5-oxo-1-tosylpyrrolidine-2,2-dicarboxylate (3v):** Flash column chromatography on silica gel (ethyl acetate/petroleum ether, 1:10) gave the product (66.9 mg, 79% yield) as a white solid: mp 132.1-134.6 °C; [ $\alpha$ ]<sub>D</sub><sup>25</sup> (c 0.503, CHCl<sub>3</sub>) = -84.5; <sup>1</sup>H NMR (400 MHz, CDCl<sub>3</sub>)  $\delta$  = 8.05 (d,  $J$  = 8.4 Hz, 2H), 7.30 (d,  $J$  = 8.0 Hz, 2H), 4.43-4.27 (m, 4H), 2.57 (dd,  $J$  = 17.2, 8.4 Hz, 1H), 2.41-2.35 (m, 4H), 2.18 (dd,  $J$  = 17.6, 8.4 Hz, 1H), 1.35 (td,  $J$  = 7.2, 1.6 Hz, 6H), 0.92-0.84 (m, 1H), 0.59-0.49 (m, 2H), 0.32-0.26 (m, 1H), 0.14-0.08 (m, 1H); <sup>13</sup>C NMR (100 MHz, CDCl<sub>3</sub>)  $\delta$  = 172.2, 167.6, 165.6, 145.3, 135.6, 130.0, 129.0, 76.4, 63.1, 62.9, 46.9, 36.4, 21.8, 14.1, 14.0, 12.2, 4.8, 3.4; HRMS(ESI) calcd for C<sub>20</sub>H<sub>26</sub>NO<sub>7</sub>S (M+H)<sup>+</sup>: 424.1424, Found: 424.1416; 96% *ee* as determined by HPLC (Chiralcel IB, 90:10 hexanes/*i*-PrOH, 1.0 mL/min), tr (major) = 16.6 min, tr (minor) = 19.9 min.

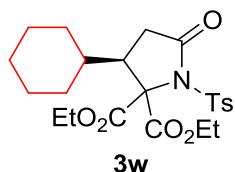

**Diethyl (R)-3-cyclohexyl-5-oxo-1-tosylpyrrolidine-2,2-dicarboxylate (3w):** Flash column chromatography on silica gel (ethyl acetate/petroleum ether, 1:10) gave the product (67.9 mg, 73% yield) as a white solid: mp 99.8-103.6 °C; [ $\alpha$ ]<sub>D</sub><sup>25</sup> (c 0.523, CHCl<sub>3</sub>) = -52.6; <sup>1</sup>H NMR (400 MHz, CDCl<sub>3</sub>)  $\delta$  = 7.94 (d,  $J$  = 8.4 Hz, 2H), 7.29 (d,  $J$  = 8.0 Hz, 2H), 4.40-4.30 (m, 4H), 2.68-2.60 (m, 1H), 2.46 (dd,  $J$  = 16.8, 7.6 Hz, 1H), 2.41 (s, 3H), 2.21 (dd,  $J$  = 16.8, 12.8 Hz, 1H), 2.08 (d,  $J$  = 12.4 Hz, 1H), 1.68-1.41 (m, 5H), 1.34 (q,  $J$  = 6.8 Hz, 6H), 1.20-1.06 (m, 3H), 0.84 (qd,  $J$  = 12.0, 2.8 Hz, 2H); <sup>13</sup>C NMR (100 MHz, CDCl<sub>3</sub>)  $\delta$  = 172.1, 167.8, 165.7, 145.3, 135.4, 129.6, 129.1, 75.8, 63.2, 62.8, 49.7, 38.7, 34.9, 31.3, 31.0, 26.0, 25.9, 25.7, 21.8, 14.1, 13.9; HRMS(ESI) calcd for C<sub>23</sub>H<sub>32</sub>NO<sub>7</sub>S (M+H)<sup>+</sup>: 466.1894, Found: 466.1985; 99% *ee* as determined by HPLC (Chiralcel IA, 90:10 hexanes/*i*-PrOH, 0.8 mL/min), tr (major) = 22.5 min, tr (minor) = 21.5 min.



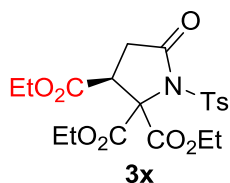

**Triethyl (S)-5-oxo-1-tosylpyrrolidine-2,2,3-tricarboxylate (3x):** Flash column chromatography on silica gel (ethyl acetate/petroleum ether, 1:10) gave the product (57.4 mg, 63% yield) as a white solid: mp 177.2-179.3 °C;  $[\alpha]_D^{25}$  (c 0.243, CHCl<sub>3</sub>) = -123.5; <sup>1</sup>H NMR (400 MHz, CDCl<sub>3</sub>)  $\delta$  = 8.00 (d, *J* = 8.4 Hz, 2H), 7.30 (d, *J* = 8.4 Hz, 2H), 4.47-4.29 (m, 4H), 4.17 (q, *J* = 7.2 Hz, 2H), 3.69 (dd, *J* = 11.2, 8.0 Hz, 1H), 2.79 (dd, *J* = 17.2, 10.8 Hz, 1H), 2.53 (dd, *J* = 17.6, 8.0 Hz, 1H), 2.41 (s, 3H), 1.38 (t, *J* = 7.2 Hz, 3H), 1.33 (t, *J* = 7.2 Hz, 3H), 1.23 (t, *J* = 7.2 Hz, 3H); <sup>13</sup>C NMR (100 MHz, CDCl<sub>3</sub>)  $\delta$  = 170.2, 167.8, 166.6, 165.5, 145.5, 135.3, 129.8, 129.3, 74.9, 63.8, 63.6, 62.0, 47.1, 32.6, 21.8, 14.0, 13.9, 13.9; HRMS(ESI) calcd for C<sub>20</sub>H<sub>25</sub>NNaO<sub>9</sub>S (M+Na)<sup>+</sup>: 478.1142, Found: 478.1134; 99% *ee* as determined by HPLC (Chiralcel ODH, 85:15 hexanes/*i*-PrOH, 1.0 mL/min), tr (major) = 14.3 min, tr (minor) = 17.9 min.

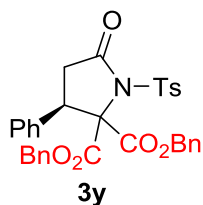

**Dibenzyl (R)-5-oxo-3-phenyl-1-tosylpyrrolidine-2,2-dicarboxylate (3y):** Flash column chromatography on silica gel (ethyl acetate/petroleum ether, 1:3) gave the product (72.3 mg, 62% yield) as a white solid: mp 104.8-106.6 °C;  $[\alpha]_D^{25}$  (c 0.258, CHCl<sub>3</sub>) = -94.2; <sup>1</sup>H NMR (400 MHz, CDCl<sub>3</sub>)  $\delta$  = 7.98 (d, *J* = 8.0 Hz, 2H), 7.35-7.19 (m, 11H), 7.12 (t, *J* = 7.2 Hz, 2H), 7.02 (d, *J* = 6.4 Hz, 2H), 6.87 (d, *J* = 7.6 Hz, 2H), 5.36 (dd, *J* = 28.8, 12.0 Hz, 2H), 4.93 (d, *J* = 12.4 Hz, 1H), 4.71 (d, *J* = 12.4 Hz, 1H), 3.97 (t, *J* = 8.8 Hz, 1H), 2.88 (dd, *J* = 17.2, 9.6 Hz, 1H), 2.77 (dd, *J* = 17.2, 8.8 Hz, 1H), 2.42 (s, 3H); <sup>13</sup>C NMR (100 MHz, CDCl<sub>3</sub>)  $\delta$  = 172.1, 167.1, 165.2, 145.5, 135.1, 134.7, 134.6, 134.4, 130.1, 129.9, 129.1, 128.9, 128.8, 128.7, 128.6, 128.5, 128.4, 128.3, 127.4, 68.9, 68.4, 58.8, 47.2, 36.2, 21.9; HRMS(ESI) calcd for C<sub>33</sub>H<sub>29</sub>NNaO<sub>7</sub>S (M+Na)<sup>+</sup>: 606.1557, Found: 606.1548; 91% *ee* as determined by HPLC (Chiralcel ASH, 85:15 hexanes/*i*-PrOH, 1.0 mL/min), tr (major) = 32.4 min, tr (minor) = 45.8 min.

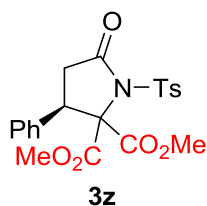

**Dimethyl (R)-5-oxo-3-phenyl-1-tosylpyrrolidine-2,2-dicarboxylate (3z):** Flash column chromatography on silica gel (ethyl acetate/petroleum ether, 1:3) gave the product (73.3 mg, 85% yield) as a white solid: mp 185.4-186.9 °C;  $[\alpha]_D^{25}$  (c 0.183, CHCl<sub>3</sub>) = -73.2; <sup>1</sup>H NMR (400 MHz, CDCl<sub>3</sub>)  $\delta$  = 8.04 (d, *J* = 8.4 Hz, 2H), 7.34 (d, *J* = 8.4 Hz, 2H), 7.31-7.29 (m, 3H), 7.09-7.07 (m, 2H), 4.03 (t, *J* = 8.8 Hz, 1H), 3.95 (s, 3H), 3.40 (s, 3H), 2.95-2.84 (m, 2H), 2.44 (s, 3H); HRMS(ESI) calcd for C<sub>21</sub>H<sub>22</sub>NO<sub>7</sub>S (M+H)<sup>+</sup>: 432.1111, Found: 432.1097; 90% *ee* as determined by HPLC (Chiralcel AD, 70:30 hexanes/*i*-PrOH, 0.5 mL/min), tr (major) = 14.4 min, tr (minor) = 34.0 min.

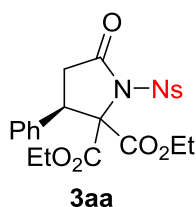

**Diethyl (R)-1-((4-nitrophenyl)sulfonyl)-5-oxo-3-phenylpyrrolidine-2,2-dicarboxylate (3aa):** Flash column chromatography on silica gel (ethyl acetate/petroleum ether, 1:5) gave the product (87.3 mg, 89% yield) as a white solid: mp 166.7-169.8 °C;  $[\alpha]_D^{25}$  (c 0.284, CHCl<sub>3</sub>) = -114.4; <sup>1</sup>H NMR (400 MHz, CDCl<sub>3</sub>)  $\delta$  = 8.43-8.36 (m, 4H), 7.33-7.27 (m, 3H), 7.10-7.07 (m, 2H), 4.44 (q, *J* = 7.2 Hz, 2H), 4.08 (t, *J* = 8.4 Hz, 1H), 3.98-3.90 (m, 1H), 3.83-3.75 (m, 1H), 2.97-2.85 (m, 2H), 1.40 (t, *J* = 6.8 Hz, 3H), 0.963 (t, *J* = 6.8 Hz, 3H); <sup>13</sup>C NMR (100 MHz, CDCl<sub>3</sub>)  $\delta$  = 172.4, 167.2, 165.1, 150.9, 143.7, 135.4, 131.6, 129.0, 128.8, 128.4, 123.6, 78.0, 63.7, 63.1, 46.8, 36.5, 14.1, 13.6; HRMS(ESI) calcd for C<sub>22</sub>H<sub>23</sub>N<sub>2</sub>O<sub>9</sub>S (M+H)<sup>+</sup>: 491.1124, Found: 491.1131; 94% *ee* as determined by HPLC (Chiralcel ADH, 90:10 hexanes/*i*-PrOH, 1.0 mL/min), tr (major) = 57.5 min, tr (minor) = 45.9 min.

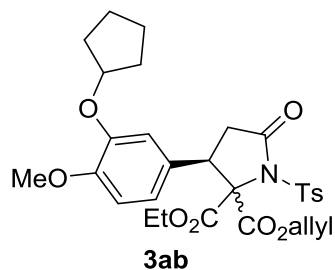

**Ethyl (3R)-2-(but-3-enoyl)-3-(3-(cyclopentyloxy)-4-methoxyphenyl)-5-oxo-1-tosylpyrrolidine-2-carboxylate (3ab):** Flash column chromatography on silica gel (ethyl acetate/petroleum ether, 1:5) gave the product (93.6 mg, 80% yield) as a colorless oil;  $[\alpha]_D^{25}$  (c 0.167, CHCl<sub>3</sub>) = -22.1; <sup>1</sup>H NMR (400 MHz, CDCl<sub>3</sub>)  $\delta$  = 8.05 (d, *J* = 2.0 Hz, 2H), 7.30 (d, *J* = 2.0 Hz, 2H), 6.71 (d, *J* = 5.6 Hz, 1H), 6.63-6.59 (m, 1H), 6.51 (d, *J* = 2.4 Hz, 1H), 5.62-5.52 (m, 1H), 5.33-5.29 (m, 1H), 5.19-5.11 (m, 1H), 4.86-4.82 (m, 1H), 4.46-4.40 (m, 2H), 4.01-3.97 (m, 2H), 3.86-3.81 (m, 1H), 3.79 (s, 3H), 2.97-2.87 (m, 1H), 2.82-2.74 (m, 1H), 2.43 (s, 3H), 1.79-1.74 (m, 6H), 1.55-1.51 (m, 2H), 1.39 (t, *J* = 6.8 Hz, 3H); <sup>13</sup>C NMR (100 MHz, CDCl<sub>3</sub>)  $\delta$  = 172.6, 167.2, 165.0, 150.2, 147.7, 145.3, 135.5, 130.9, 130.1, 129.1, 128.0, 120.7, 118.9, 114.5, 111.4, 80.5, 77.7, 67.6, 67.1, 63.4, 62.7, 56.1, 46.6, 37.0, 32.9, 24.3, 24.2, 21.8, 14.1, 13.7; HRMS(ESI) calcd for C<sub>30</sub>H<sub>36</sub>NO<sub>9</sub>S (M+H)<sup>+</sup>: 586.2105, Found: 586.2115; 89% *ee* as determined by

HPLC (Chiralcel ASH, 98:2 hexanes/*i*-PrOH, 1.0 mL/min), tr (major) = 62.2 min, tr (minor) = 5.8 min.

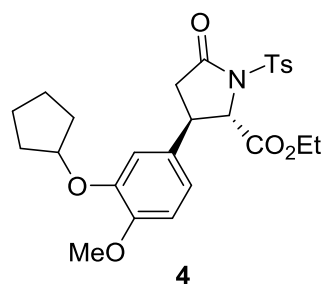

**Ethyl (2*S*, 3*R*)-3-(3-(cyclopentyloxy)-4-methoxyphenyl)-5-oxo-1-tosylpyrrolidine-2-carboxylate (4):** Flash column chromatography on silica gel (ethyl acetate/petroleum ether, 1:3) gave the product (48.2 mg, 60% yield) as a colorless oil;  $[\alpha]_D^{25}$  (c 0.173, CHCl<sub>3</sub>) = +63.4; <sup>1</sup>H NMR (400 MHz, CDCl<sub>3</sub>)  $\delta$  = 7.95-7.91 (m, 2H), 7.33-7.30 (m, 2H), 6.78-6.74 (m, 1H), 6.65-6.62 (m, 2H), 4.77 (q, *J* = 2.8 Hz, 1H), 4.66-4.62 (m, 1H), 4.35-4.21 (m, 2H), 3.82 (t, *J* = 2.8 Hz, 3H), 3.45 (dt, *J* = 8.8, 3.2 Hz, 1H), 3.01-2.93 (m, 1H), 2.56-2.49 (m, 1H), 2.44 (t, *J* = 2.8 Hz, 3H), 1.89-1.80 (m, 6H), 1.60-1.56 (m, 2H), 1.51 (dt, *J* = 6.8, 3.2 Hz, 3H); <sup>13</sup>C NMR (100 MHz, CDCl<sub>3</sub>)  $\delta$  = 172.2, 170.3, 149.7, 148.3, 145.5, 134.9, 133.3, 129.5, 129.1, 118.4, 112.3, 112.2, 80.5, 67.2, 62.4, 56.2, 41.2, 38.6, 32.9, 32.8, 24.2, 21.9, 14.2; HRMS(ESI) calcd for C<sub>26</sub>H<sub>32</sub>NO<sub>7</sub>S (M+H)<sup>+</sup>: 502.1894, Found: 502.1895; 90% *ee* as determined by HPLC (Chiralcel ODH, 80:20 hexanes/*i*-PrOH, 1.0 mL/min), tr (major) = 12.5 min, tr (minor) = 15.9 min.

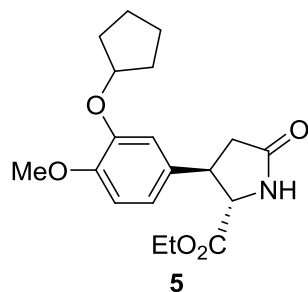

**Ethyl (2*S*, 3*R*)-3-(3-(cyclopentyloxy)-4-methoxyphenyl)-5-oxopyrrolidine-2-carboxylate (5):** Flash column chromatography on silica gel (ethyl acetate/petroleum ether, 1:1) gave the product (25.0 mg, 75% yield) as a colorless oil;  $[\alpha]_D^{25}$  (c 0.150, CHCl<sub>3</sub>) = +74.0; <sup>1</sup>H NMR (400 MHz, CDCl<sub>3</sub>)  $\delta$  = 6.83-6.77 (m, 3H), 6.51 (br, 1H), 4.77-4.73 (m, 1H), 4.24-4.14 (m, 3H), 3.82 (s, 3H), 3.65-3.59 (m, 1H), 2.83 (dd, *J* = 17.6, 9.6 Hz, 1H), 2.49 (dd, *J* = 17.6, 6.8 Hz, 1H), 1.93-1.79 (m, 6H), 1.63-1.55 (m, 2H), 1.24 (t, *J* = 7.2 Hz, 3H); HRMS(ESI) calcd for C<sub>19</sub>H<sub>26</sub>NO<sub>5</sub> (M+H)<sup>+</sup>: 348.1805, Found: 348.1813; 89% *ee* as determined by HPLC (Chiralcel ODH, 80:20 hexanes/*i*-PrOH, 1.0 mL/min), tr (major) = 9.2 min, tr (minor) = 11.0 min.

## b) References

- (1) L. D. Hawkins, Preparation of Trisubstituted Benzene Compounds for Treating Congestive Heart Failure, US 4971959 [A] 1990.
- (2) D. H. Liu, Z. L. Hu, Y. X. Zhang, Z. Q. Fu and Huang, W, Access to Enantioenriched Spiro- $\epsilon$ -Lactam Oxindoles by an N-Heterocyclic Carbene-Catalyzed [4+3] Annulation of Flexible Oxotryptamines with Enals, *Chem. Eur. J.*, 2019, **25**, 11223.
- (3) J. Sabbatani and N. Maulide, Temporary Generation of a Cyclopropyl Oxocarbenium Ion Enables Highly Diastereoselective Donor-Acceptor Cyclopropane Cycloaddition, *Angew. Chem. Int. Ed.*, 2016, **55**, 6780.
- (4) C. Guo, M. Saifuddin, T. Saravanan, M. Sharifi and G. J. Poelarends, Biocatalytic Asymmetric Michael Additions of Nitromethane to  $\alpha$ ,  $\beta$ -Unsaturated Aldehydes via Enzyme-bound Iminium Ion Intermediates, *ACS Catal.*, 2019, **9**, 4369.
- (5) A. Bouisseau, M. Gao and M. C. Willis, Traceless Rhodium-Catalyzed Hydroacylation using Alkyl Aldehydes: the Enantioselective Synthesis of  $\beta$ -aryl Ketones, *Chem. Eur. J.*, 2016, **22**, 15624.
- (6) C. B. Miao, A. Q. Zheng, L. J. Zhou, X. Lyu and H. T. Yang, Copper-catalyzed Annulation of Oxime Acetates with  $\alpha$ -amino Acid Ester Derivatives: Synthesis of 3-sulfonamido/imino 4-pyrrolin-2-ones, *Org. Lett.*, 2020, **22**, 3381.
- (7) T. M. U. Ton, F. Himawan, J. W. W. Chang and P. W. H. Chan, Copper (II) Triflate Catalyzed Amination of 1,3-dicarbonyl Compounds, *Chem. Eur. J.*, 2012, **18**, 12020.
- (8) S. Vellalath, K. N. Van and D. Romo, Direct Catalytic Asymmetric Synthesis of n-Heterocycles from Commodity Acid Chlorides by Employing  $\alpha$ ,  $\beta$ -unsaturated Acylammonium Salts, *Angew. Chem. Int. Ed.*, 2013, **52**, 13688.
- (9) T. N. Nguyen and J. A. May, Branched Amine Synthesis via Aziridine or Azetidine Opening with Organotrifluoroborates by Cooperative Brønsted/Lewis Acid Catalysis: an Acid-dependent Divergent Mechanism, *Org. Lett.*, 2018, **20**, 3618.
- (10) F. Yin, A. Garifullina and F. Tanaka, Synthesis of Pyrrolidine-3-carboxylic Acid Derivatives via Asymmetric Michael Addition Reactions of Carboxylate-Substituted Enones, *Org. Biomol. Chem.*, 2017, **15**, 6089.
- (11) J. J. Cheng, P. Chen, J. H. Zheng, C. J. Pan and Y. F. Yuan, Method for N-heterocyclic Carbene-Catalyzed Synthesis of Polysubstituted Pyrrolidone Compounds, CN 106916093[A], 2017.
- (12) Z. Q. Fu, J. F. Xu, T. S. Zhu, W. W. Yi Leong and Y. R. Chi,  $\beta$ -Carbon Activation of Saturated Carboxylic Esters through N-heterocyclic Carbene Organocatalysis, *Nature Chem.*, 2013, **5**, 835.

(5) IV:  $^1\text{H}$ ,  $^{13}\text{C}$  NMR and HPLC dates of products

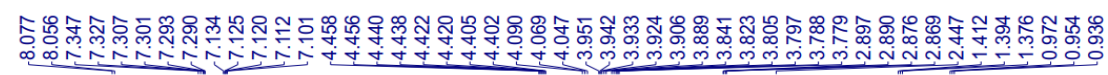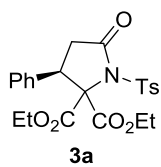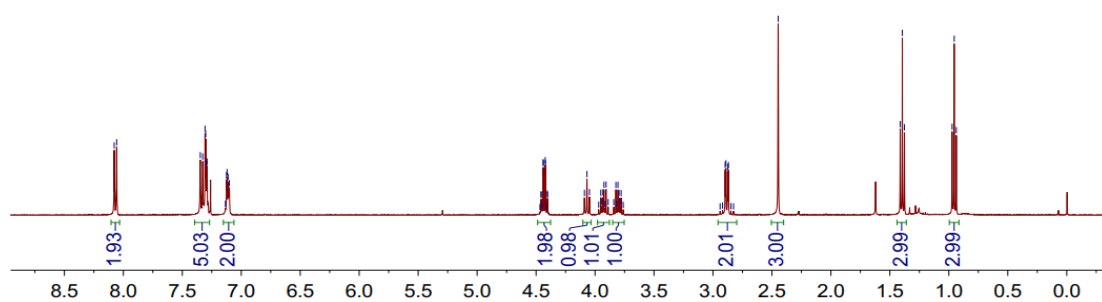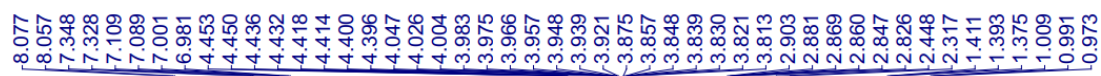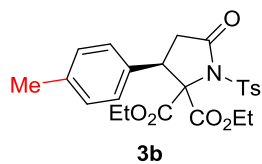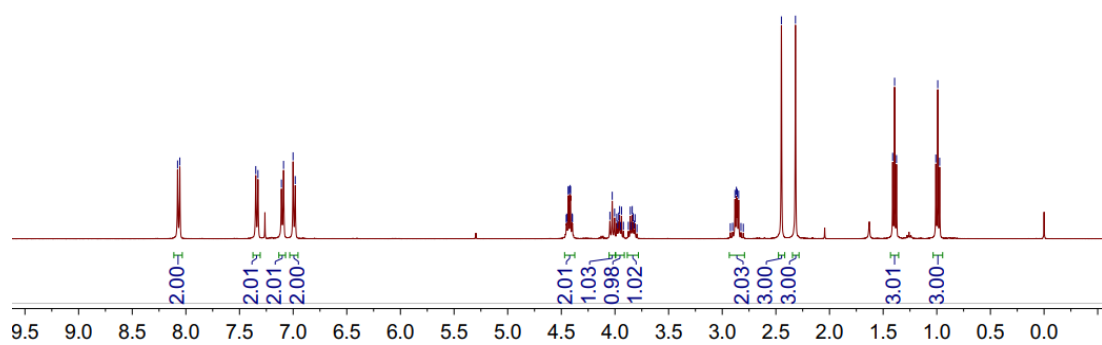

8.075  
8.055  
7.349  
7.329  
7.048  
7.026  
6.830  
6.808  
4.452  
4.461  
4.447  
4.434  
4.429  
4.417  
4.411  
4.399  
4.394  
4.384  
4.029  
4.007  
3.985  
3.975  
3.958  
3.940  
3.898  
3.880  
3.871  
3.862  
3.853  
3.844  
3.835  
3.817  
3.783  
2.913  
2.891  
2.870  
2.865  
2.849  
2.843  
2.822  
2.449  
1.411  
1.393  
1.375  
1.039  
1.021  
1.003

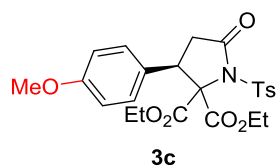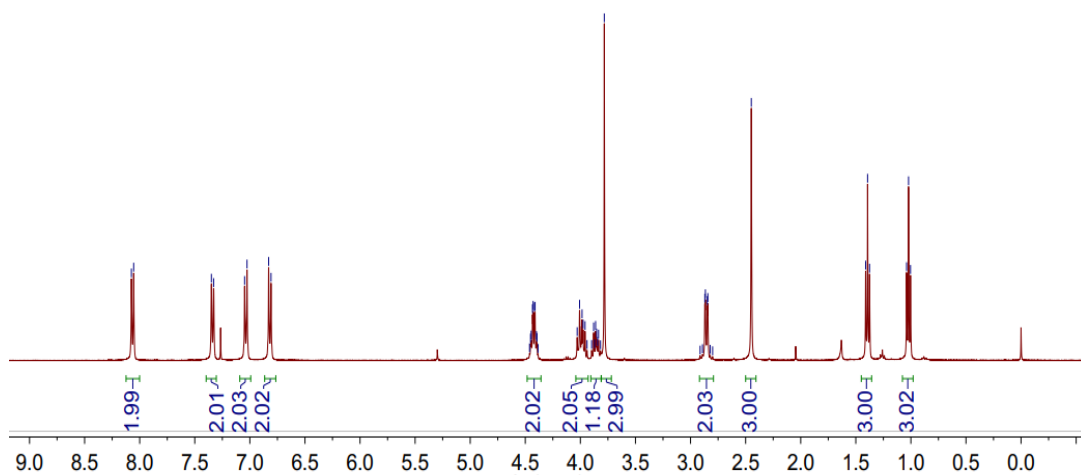

172.364  
167.293  
165.240  
159.835  
145.373  
135.396  
130.054  
129.633  
129.081  
127.182  
113.943  
77.495  
63.228  
62.664  
55.395  
46.414  
36.583  
21.853  
14.077  
13.658

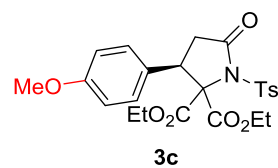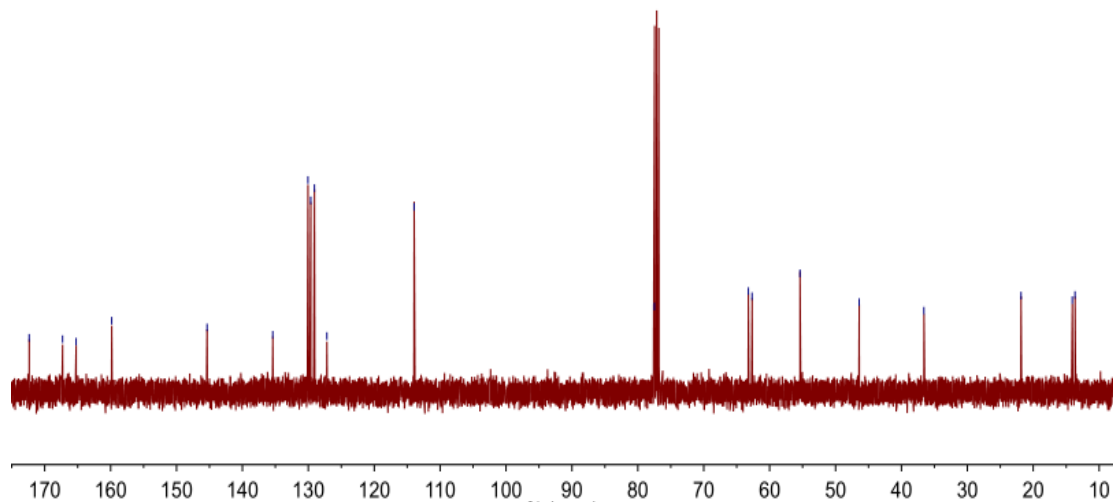

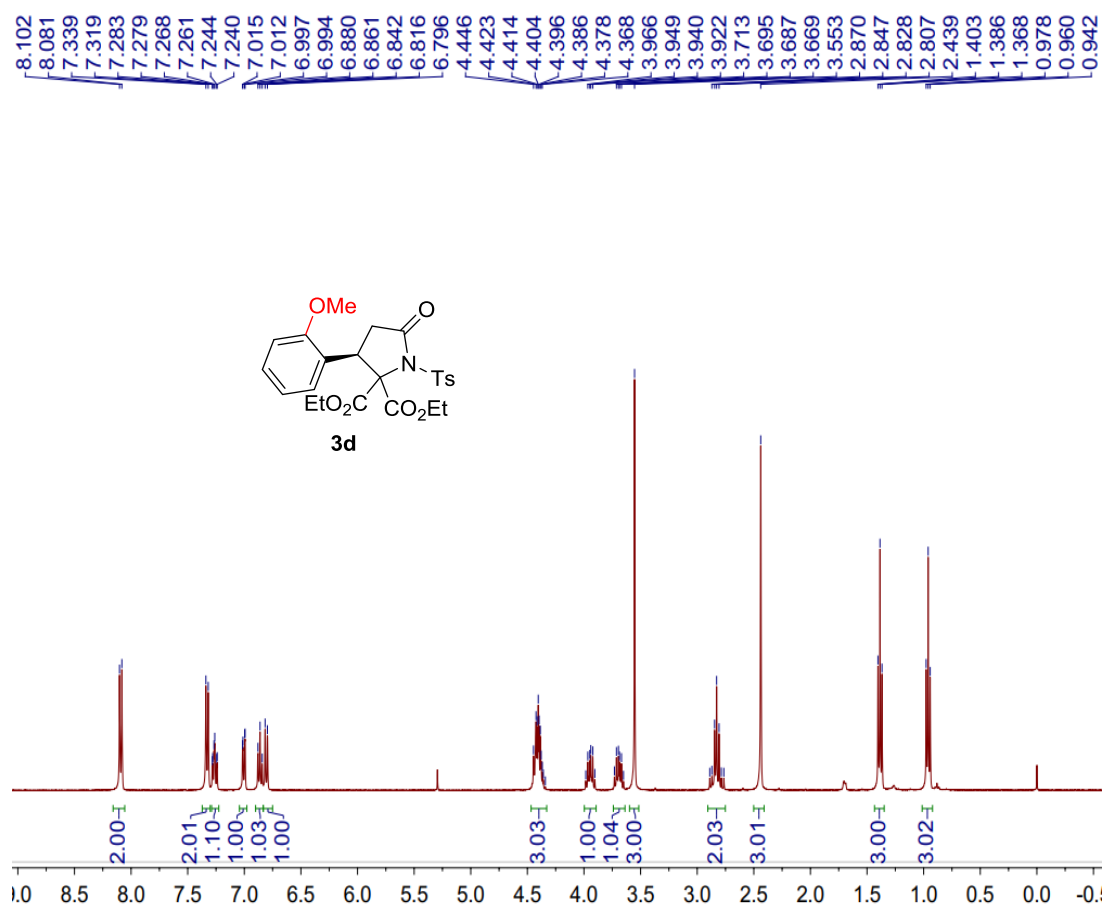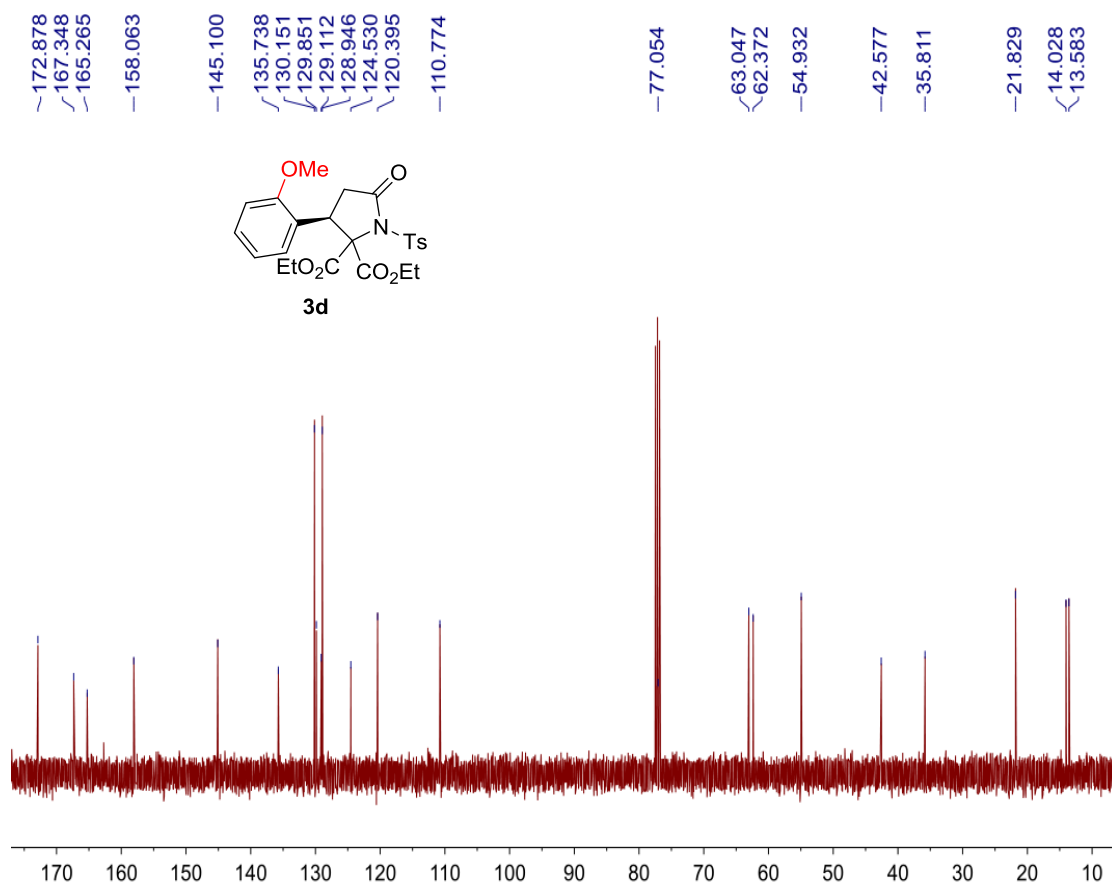

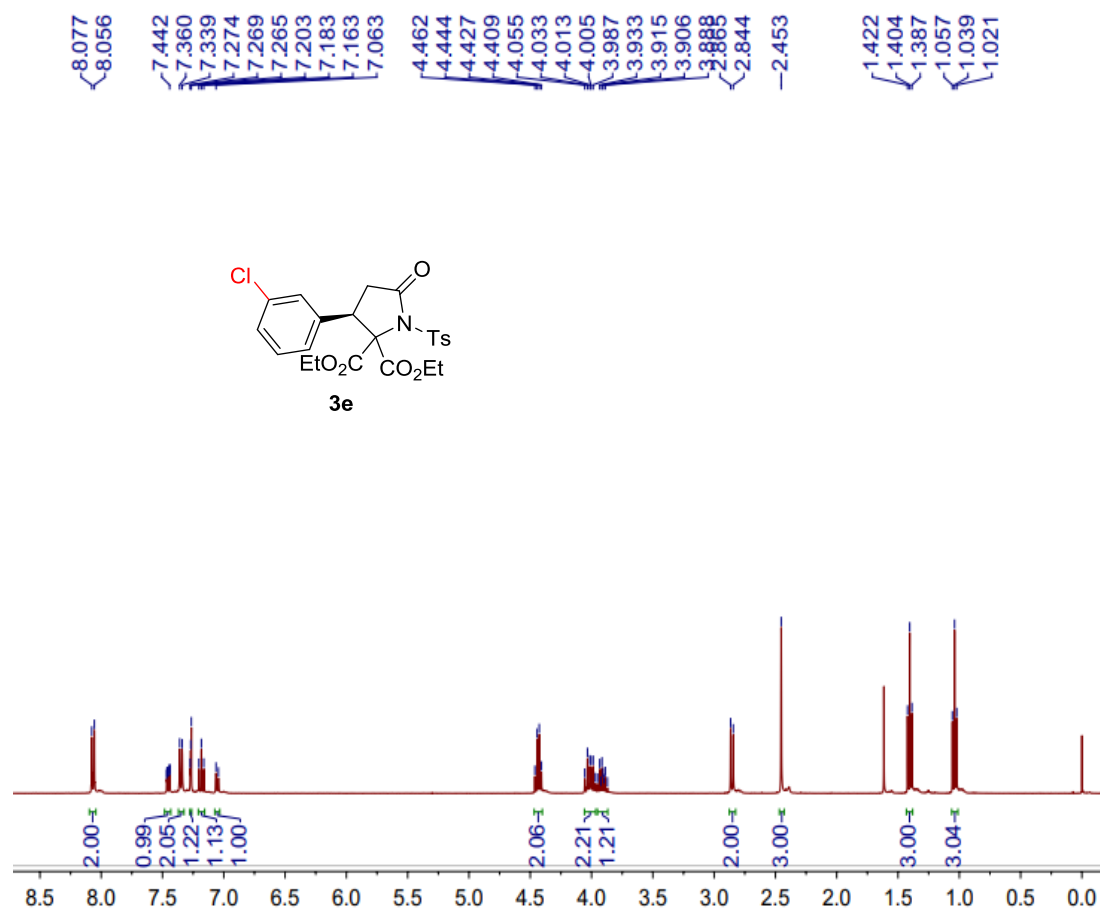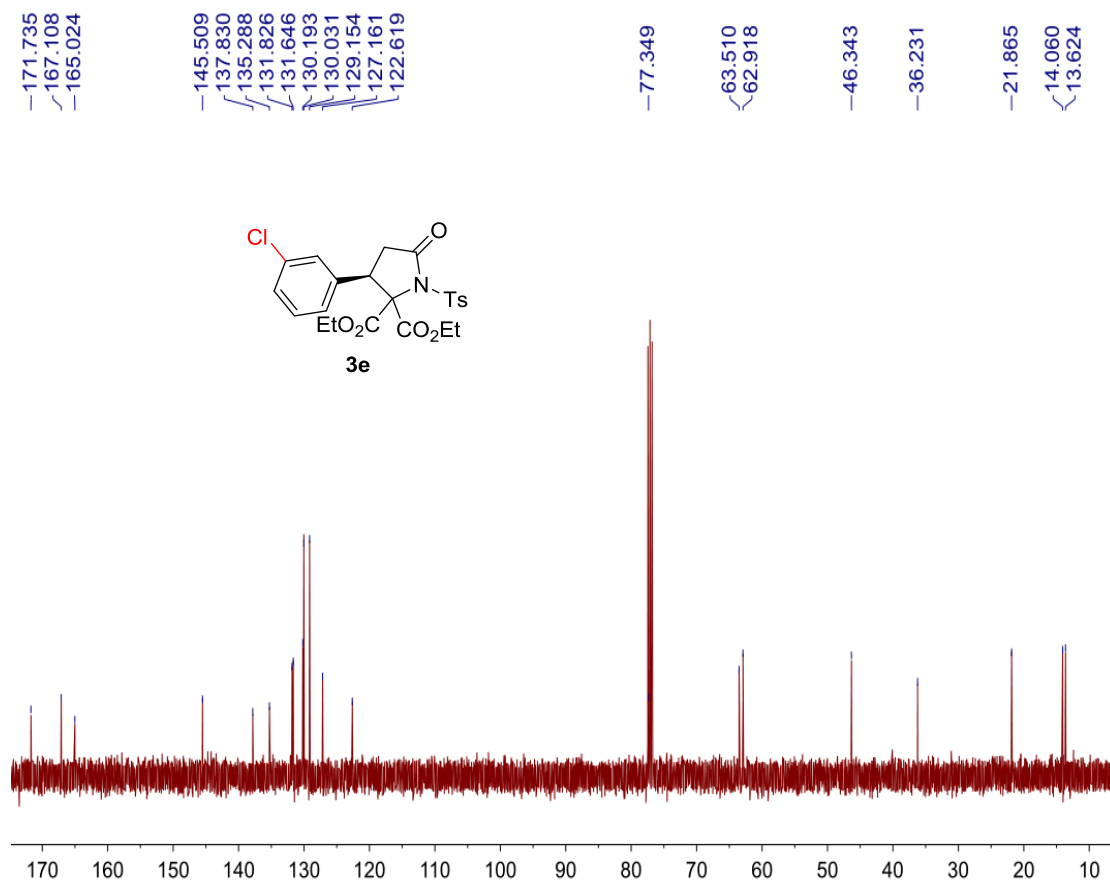



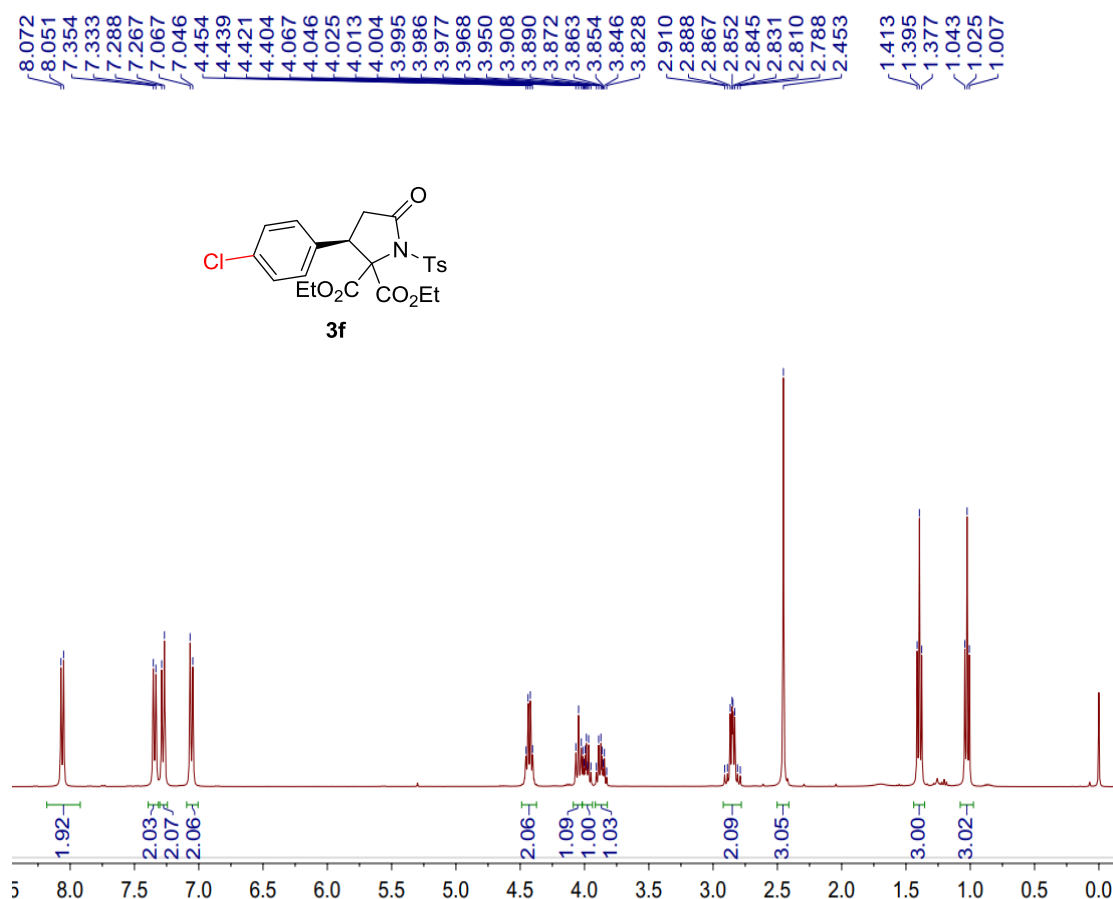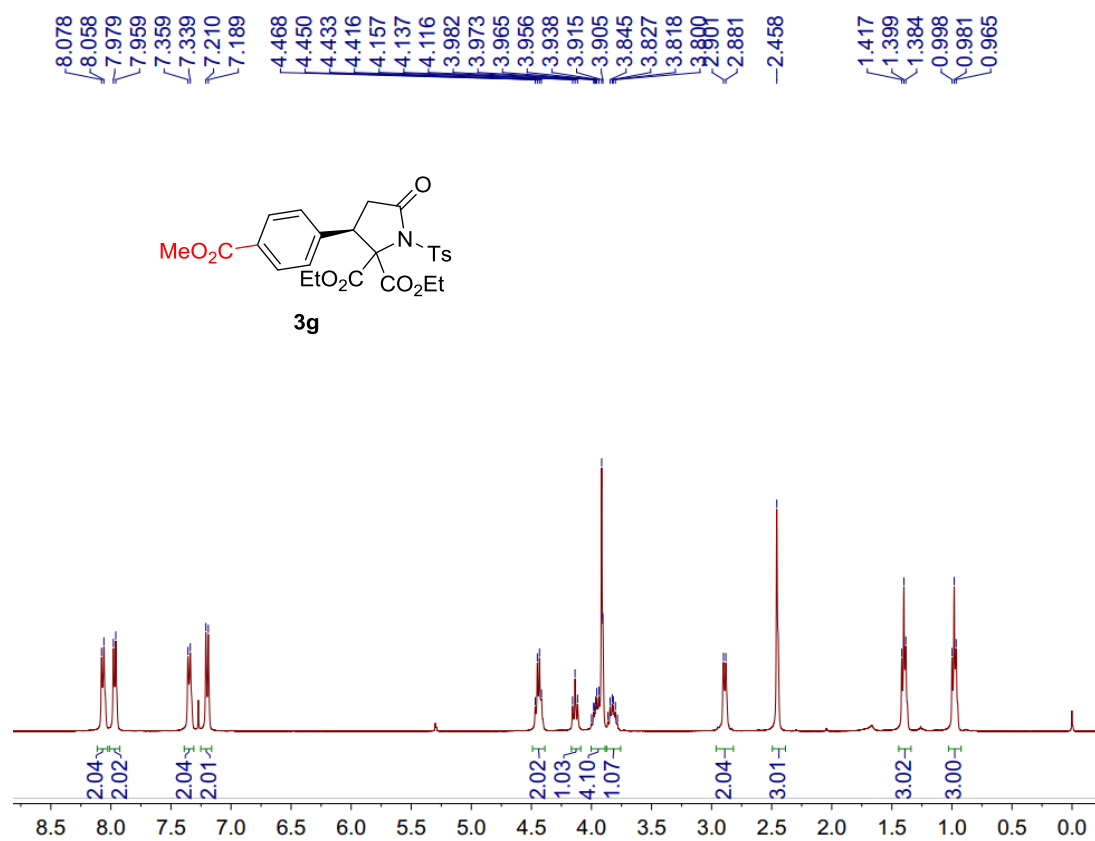

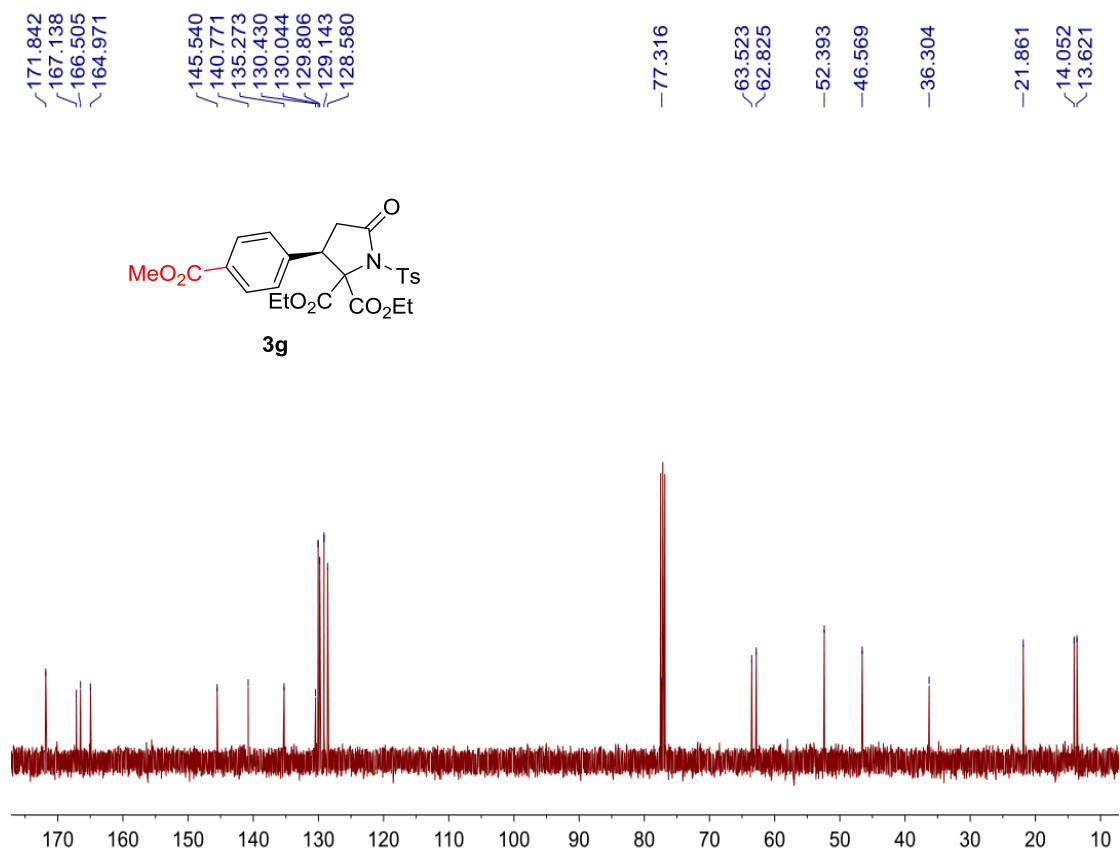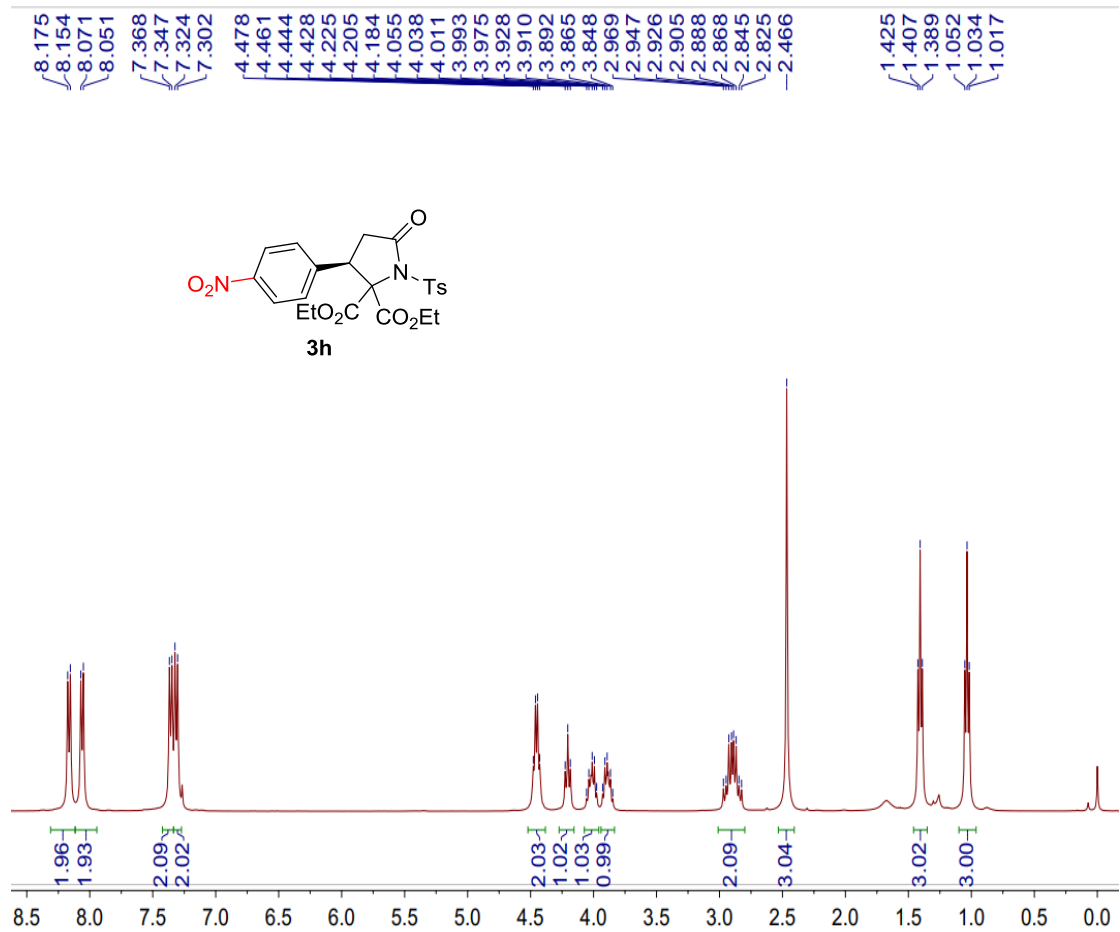

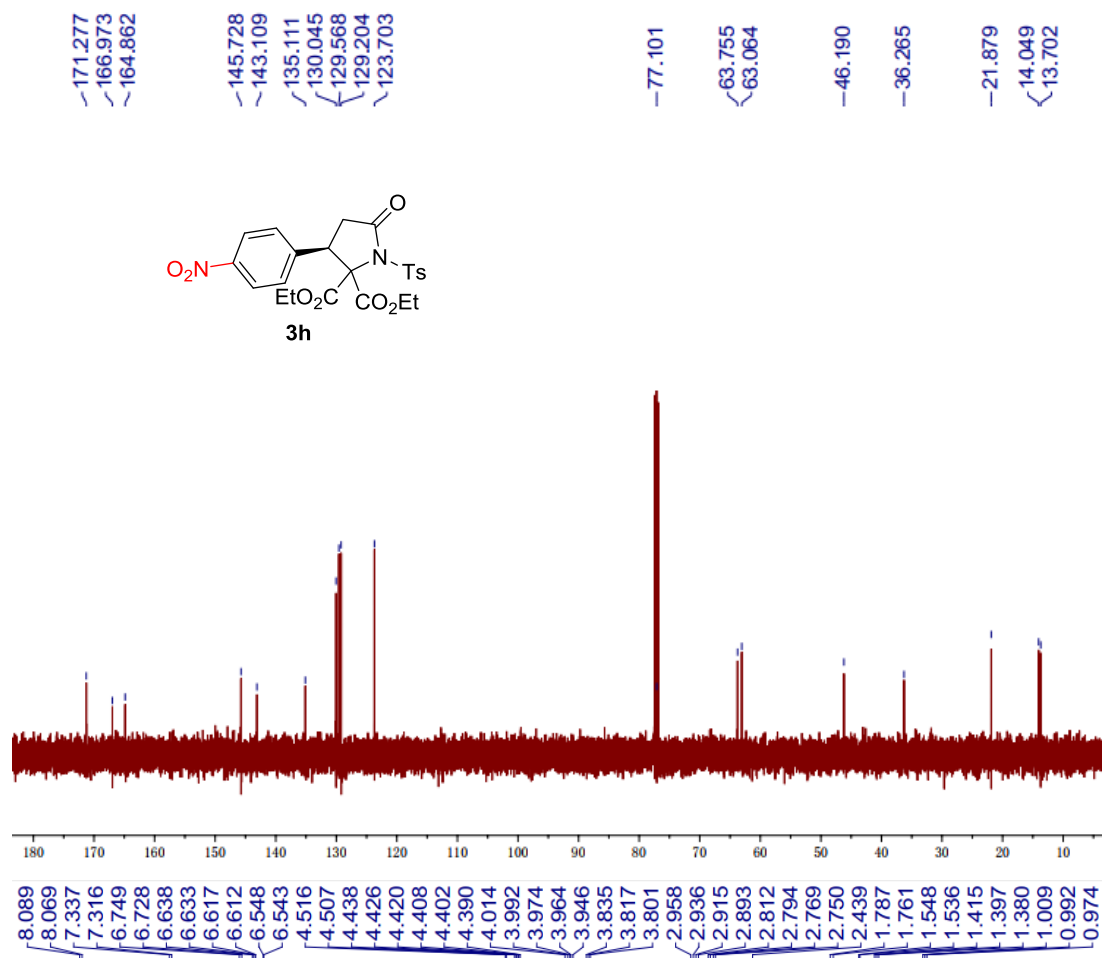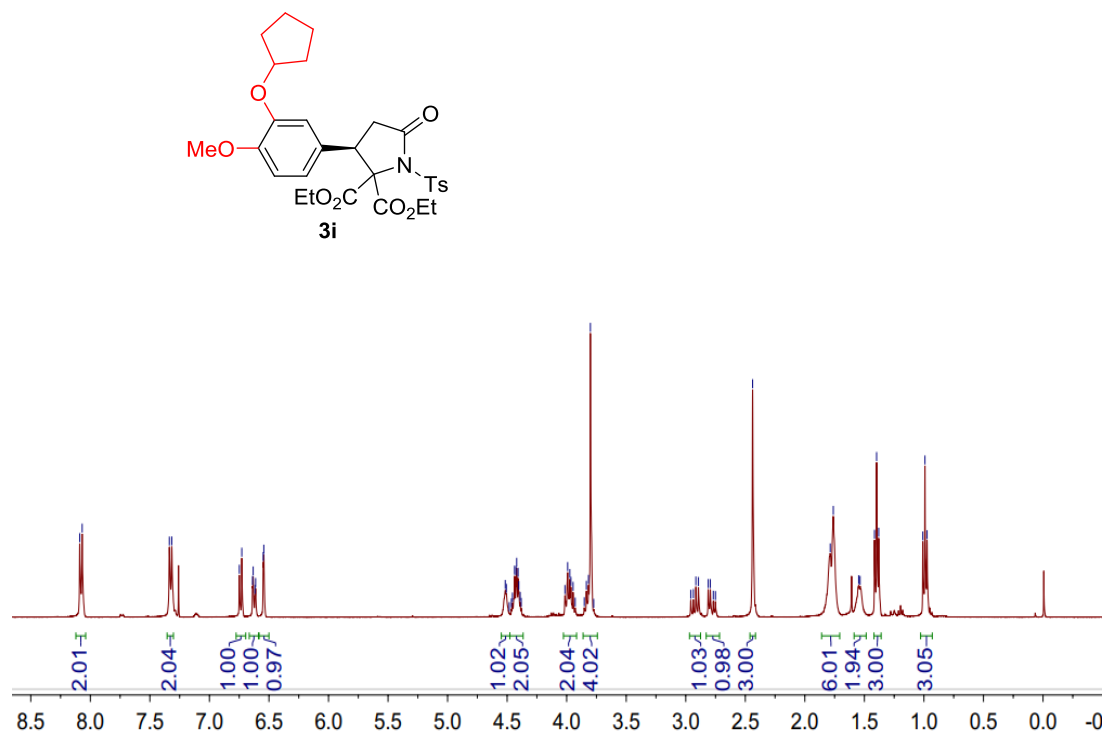

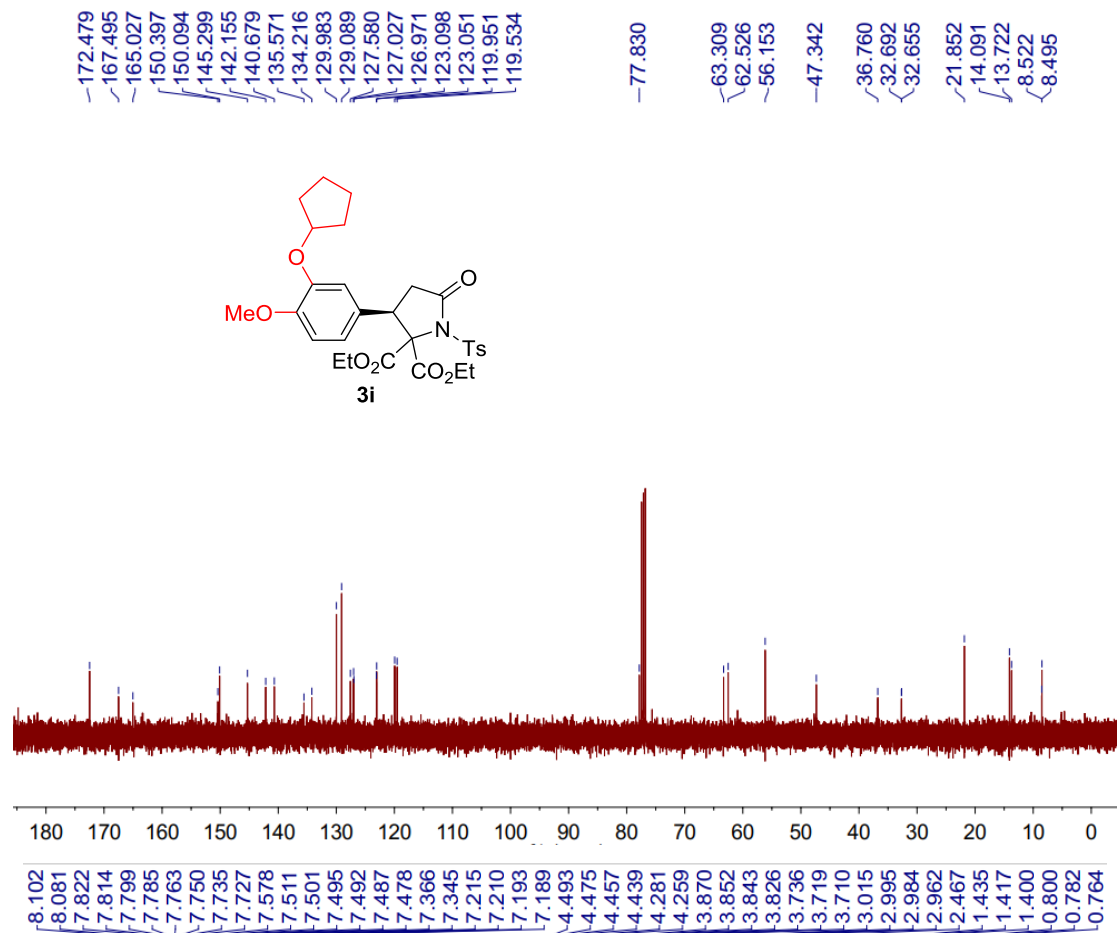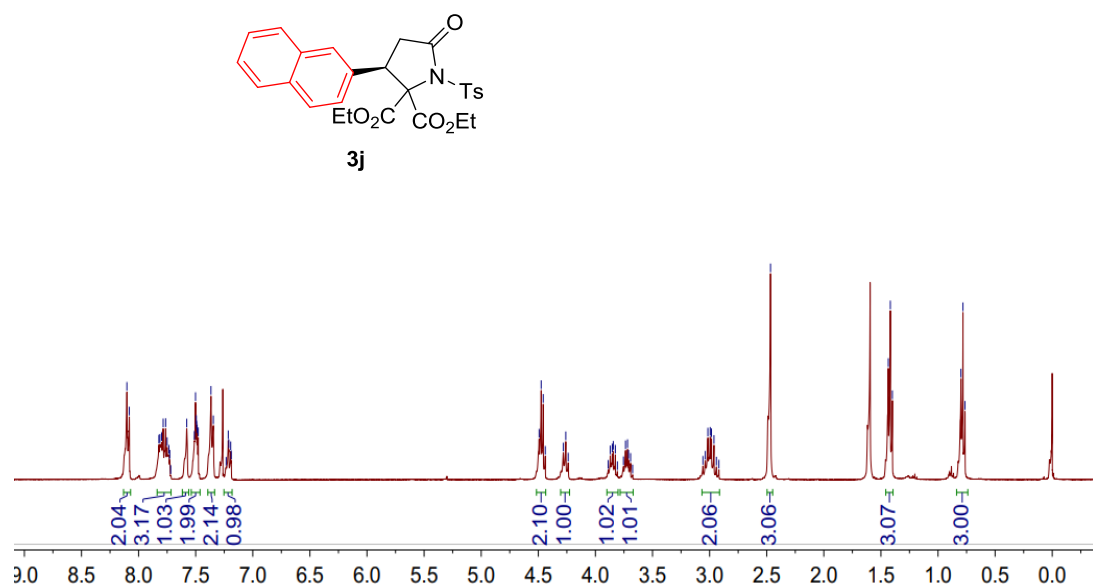

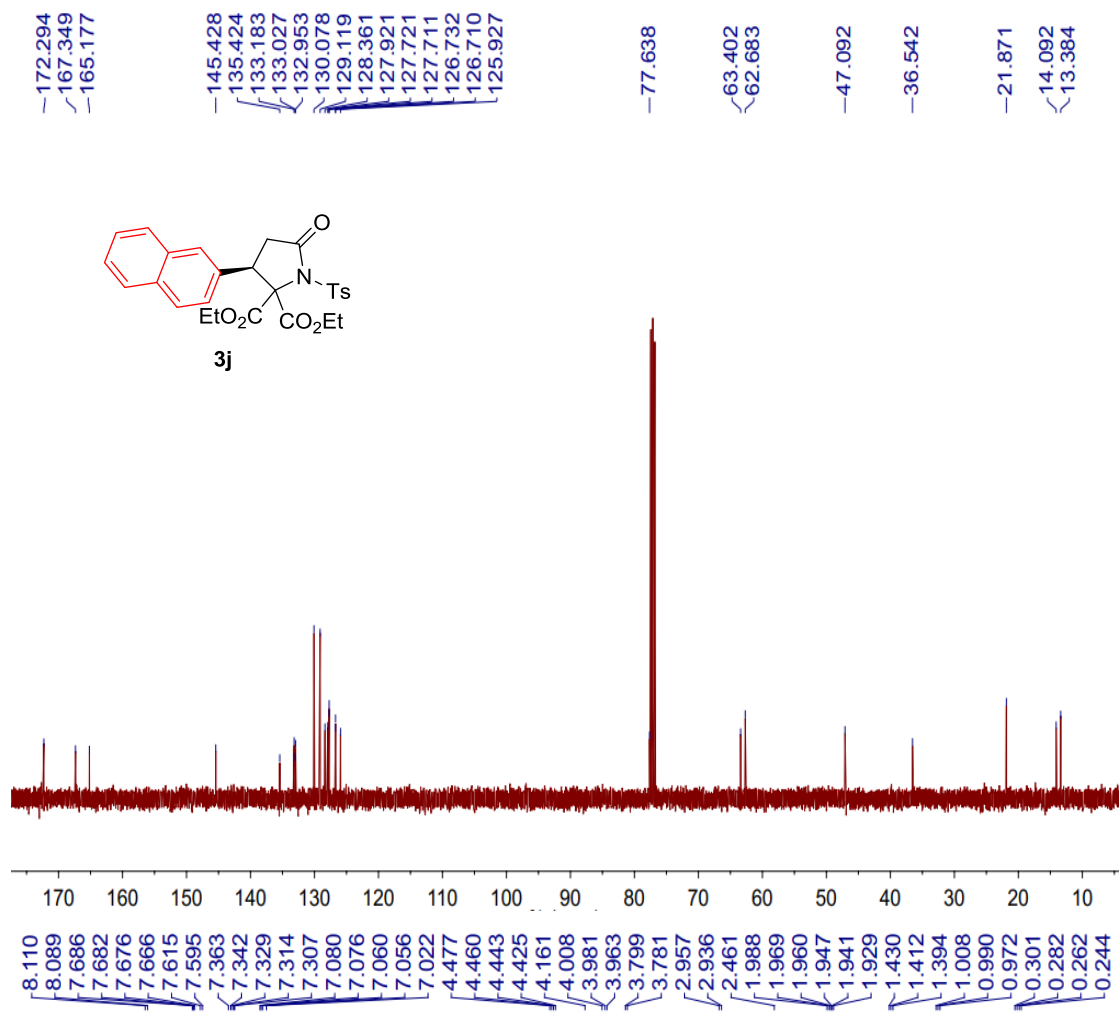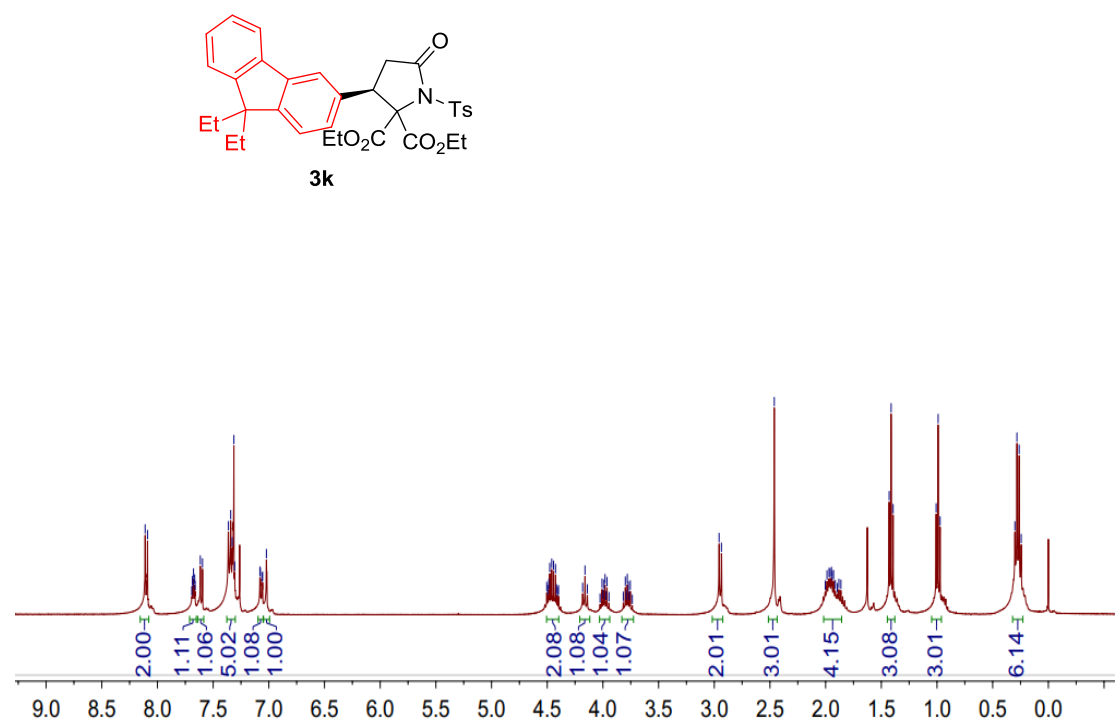

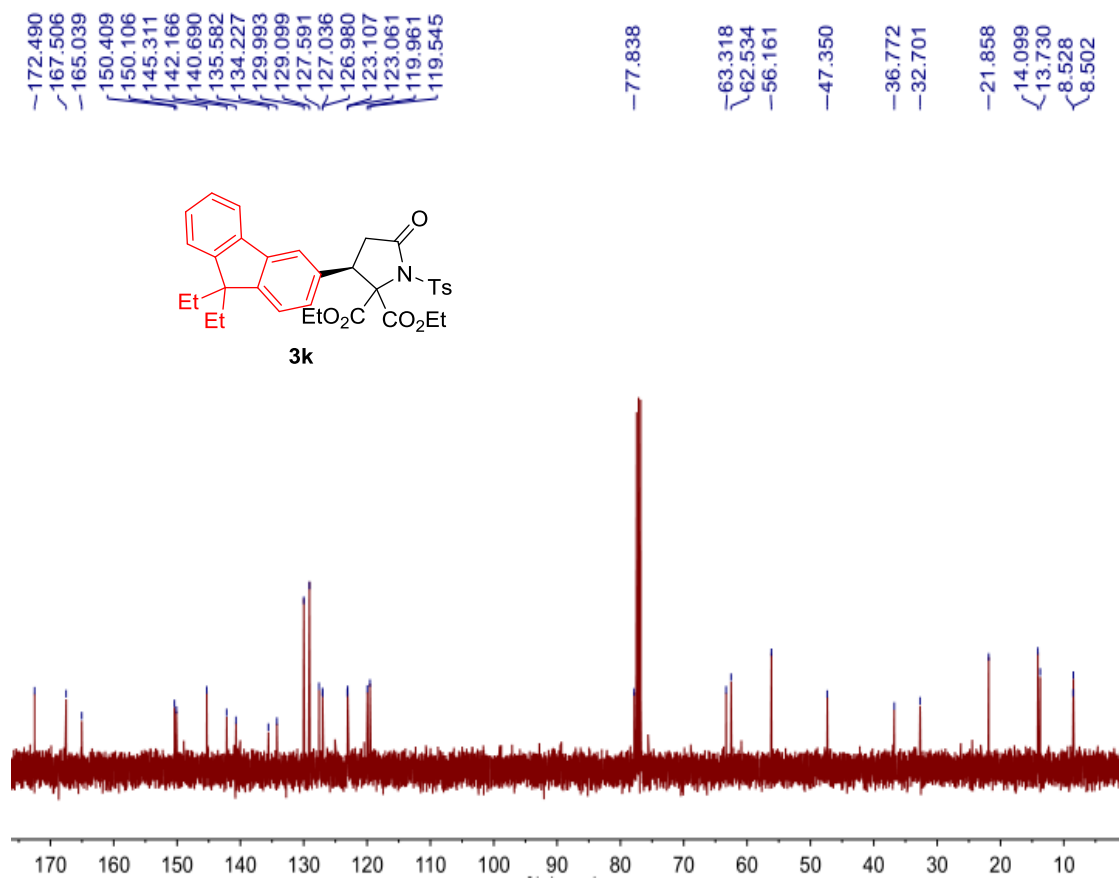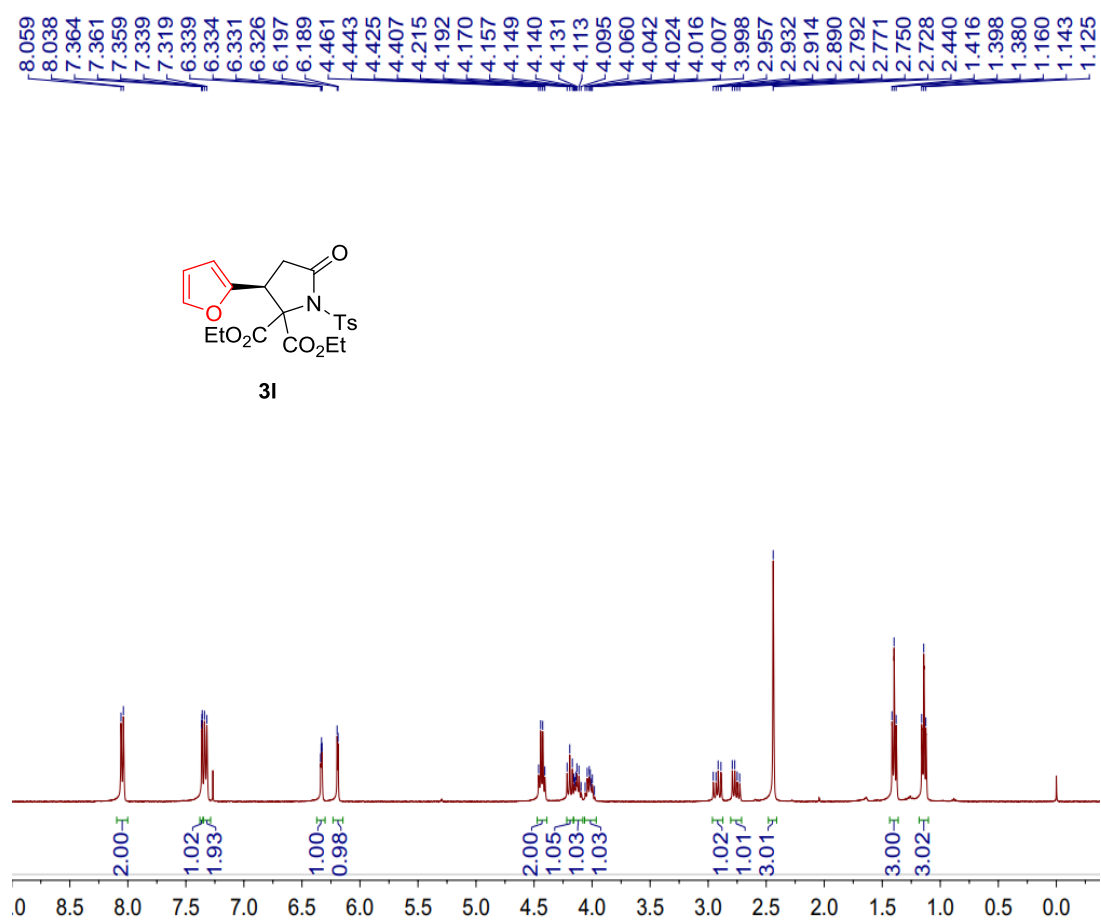

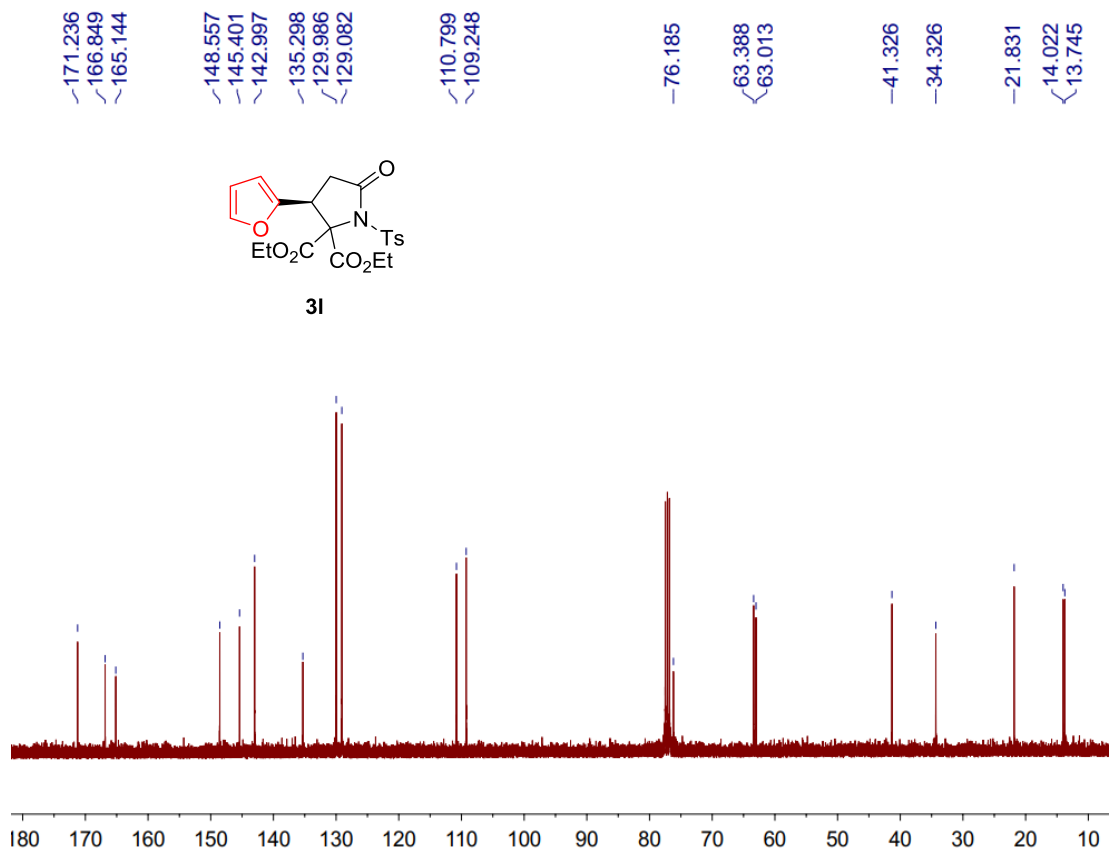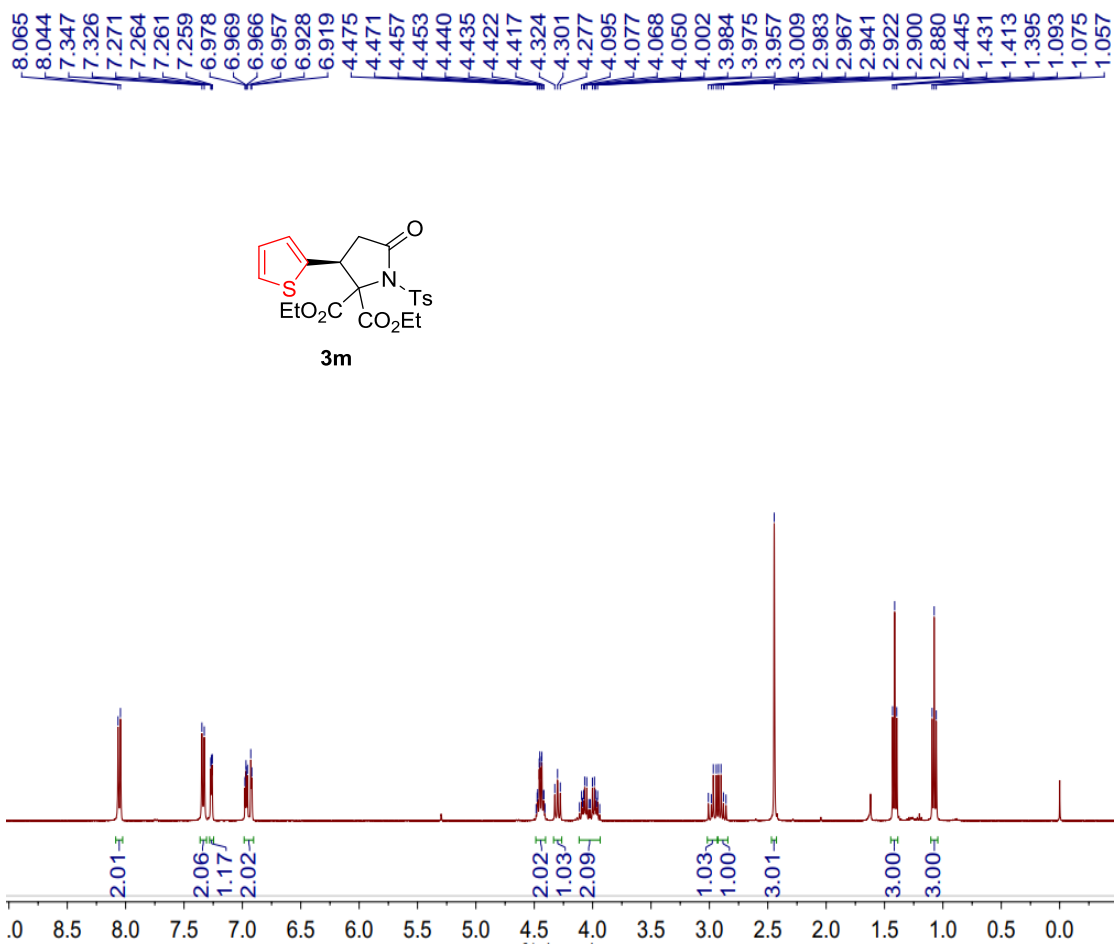

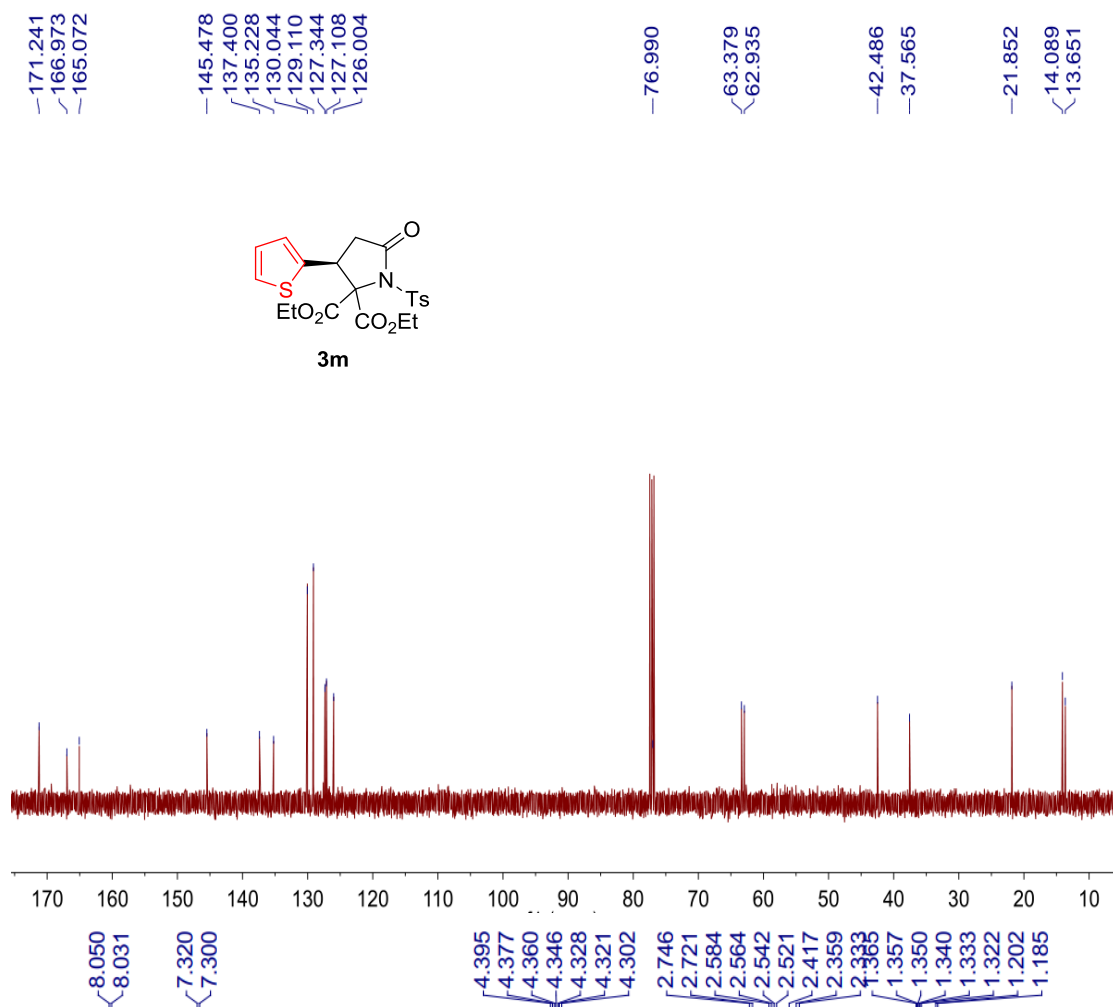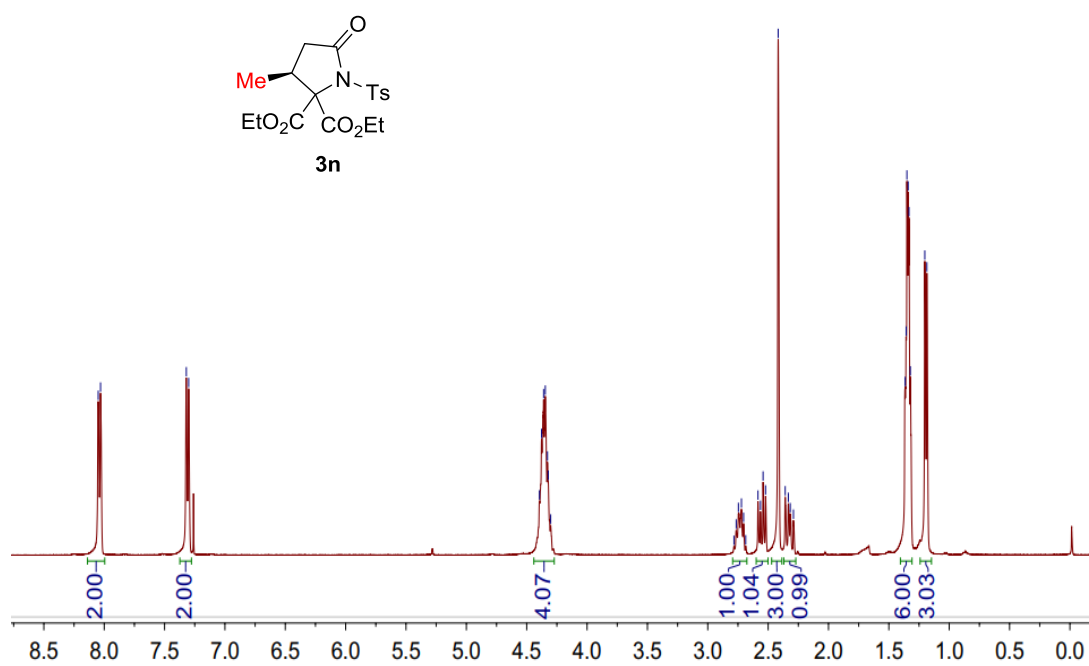



~172.471  
~167.371  
~165.762

~145.278

~135.435  
~129.908  
~129.041

~76.224

~62.925  
~62.877

~38.175  
~36.893

~21.810  
~15.734  
~14.166

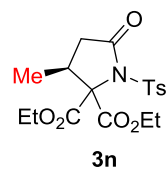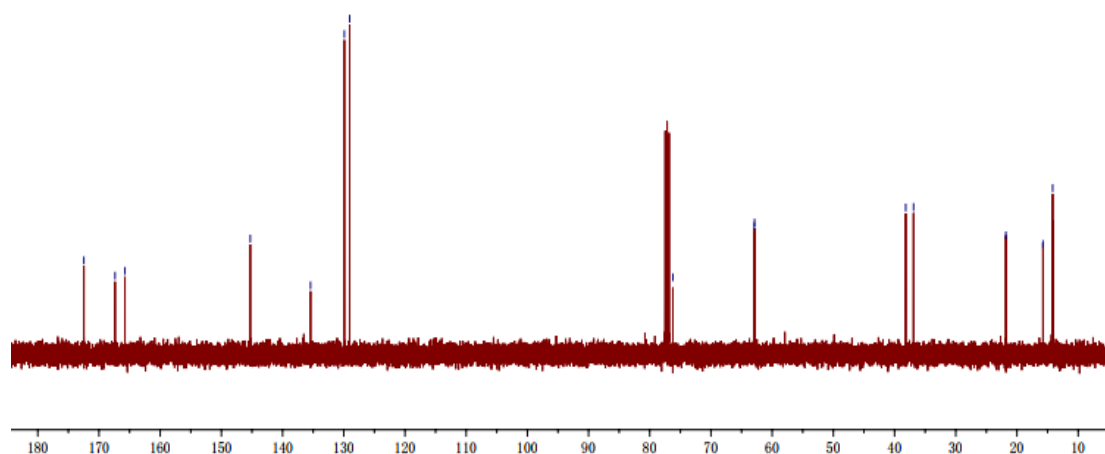

8.051  
8.030  
7.334  
7.314  
4.410  
4.401  
4.392  
4.383  
4.379  
4.374  
4.370  
4.365  
4.361  
4.356  
4.353  
4.343  
4.335  
4.326  
2.604  
2.588  
2.581  
2.572  
2.543  
2.523  
2.432  
2.372  
2.361  
2.336  
2.323  
1.847  
1.838  
1.821  
1.796  
1.377  
1.370  
1.359  
1.352  
1.341  
1.334  
1.291  
1.260  
1.235  
1.219  
1.209  
0.915  
0.898  
0.879

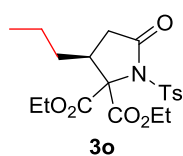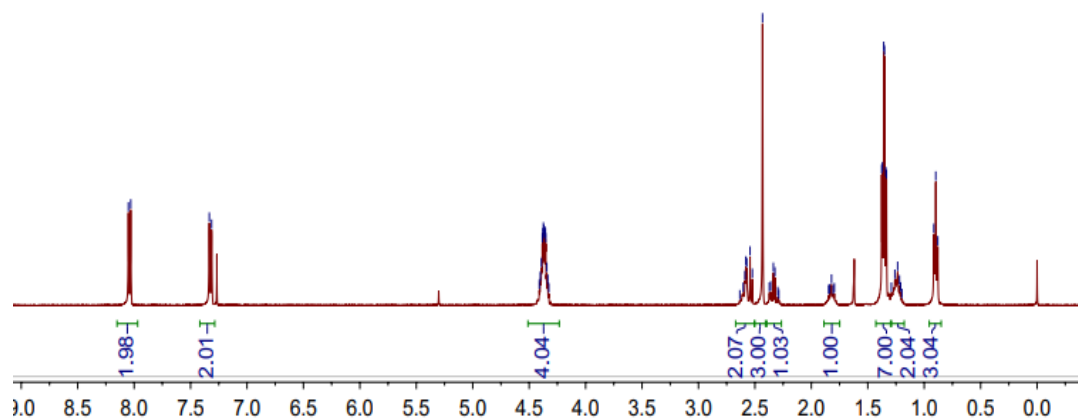

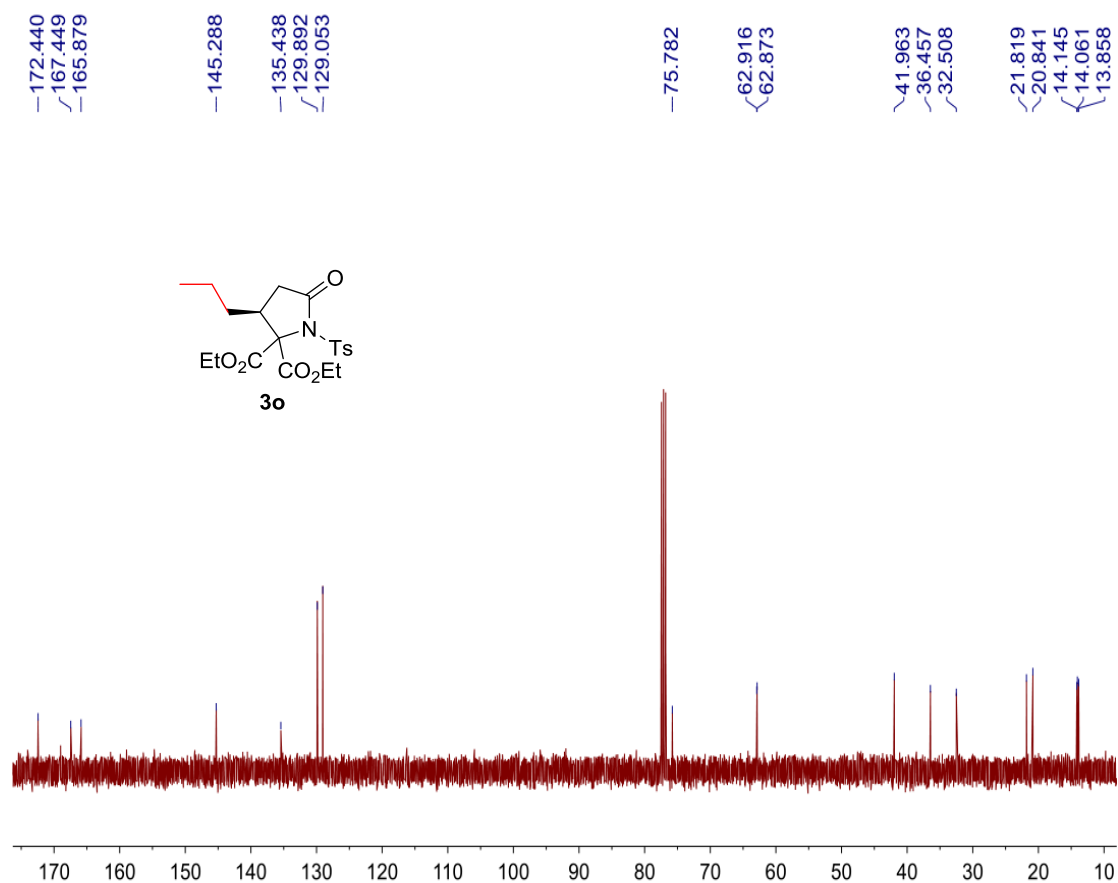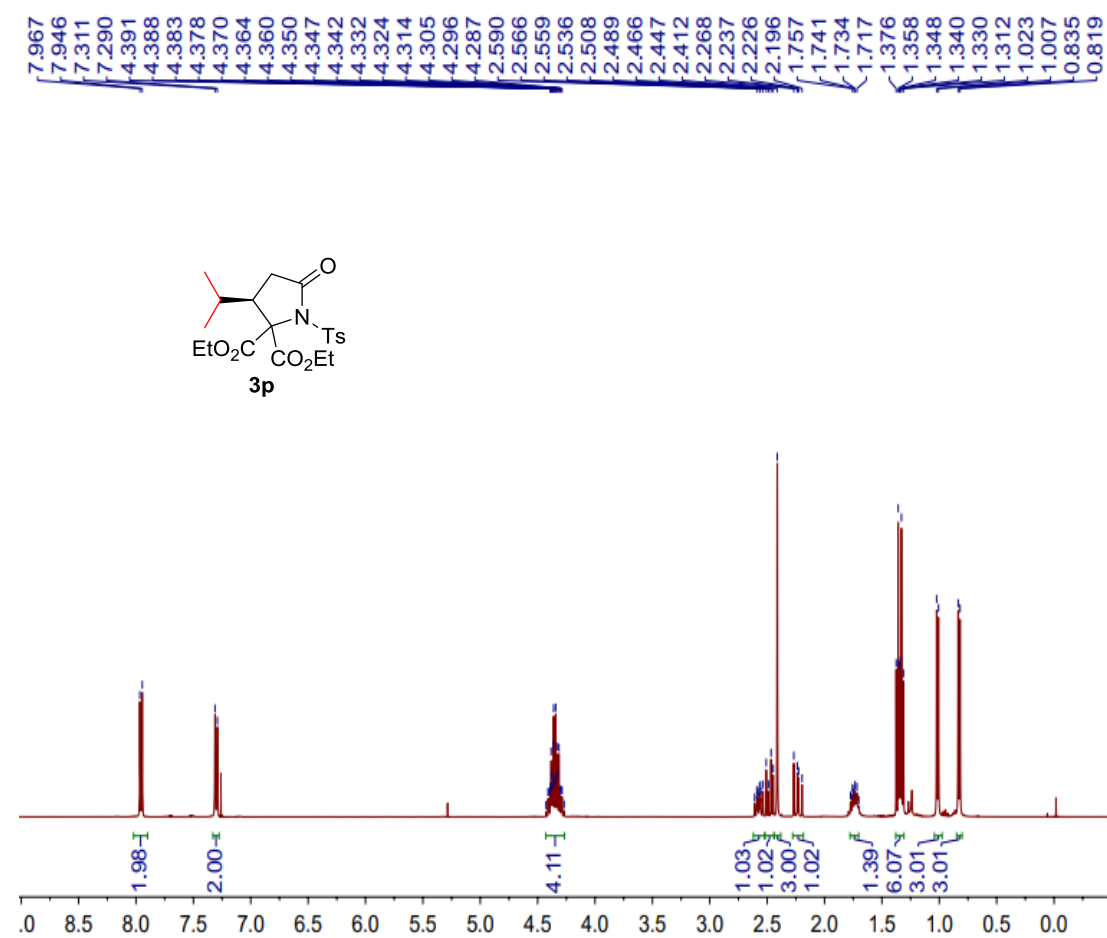

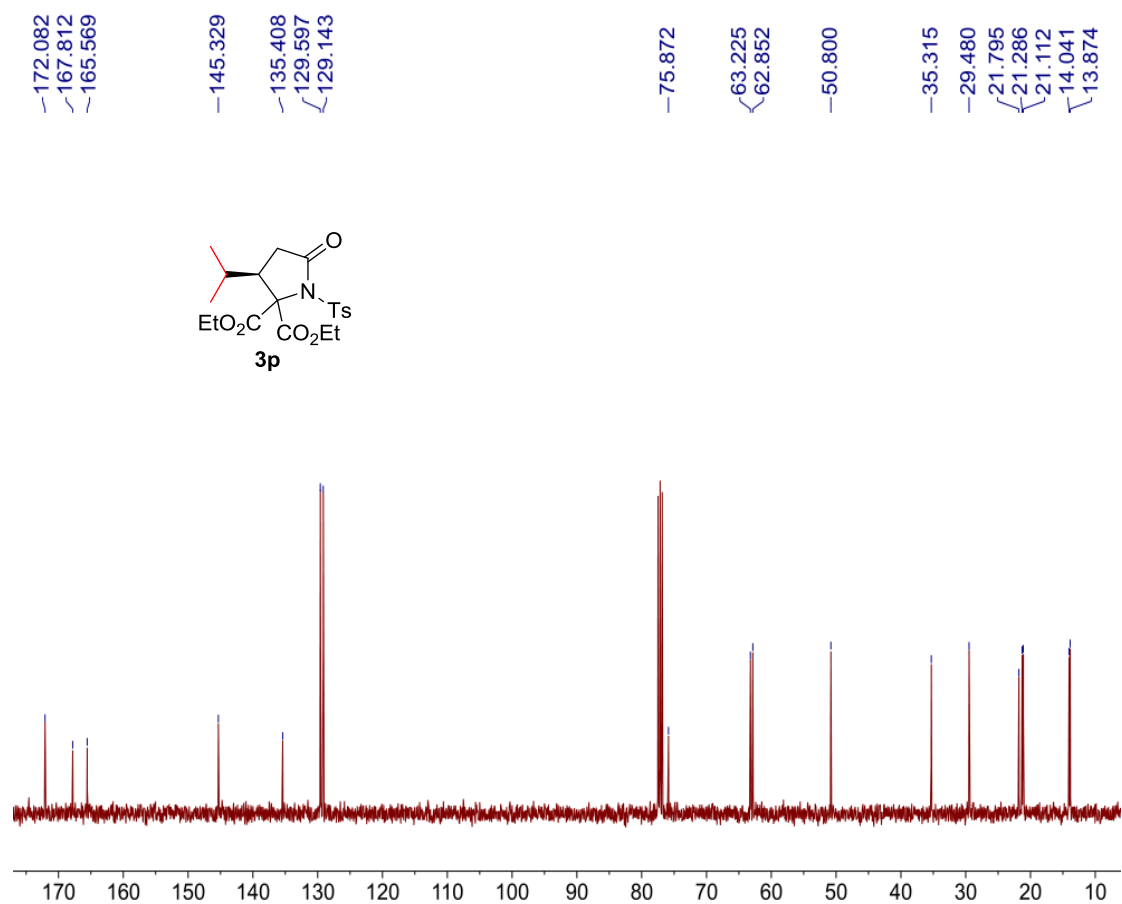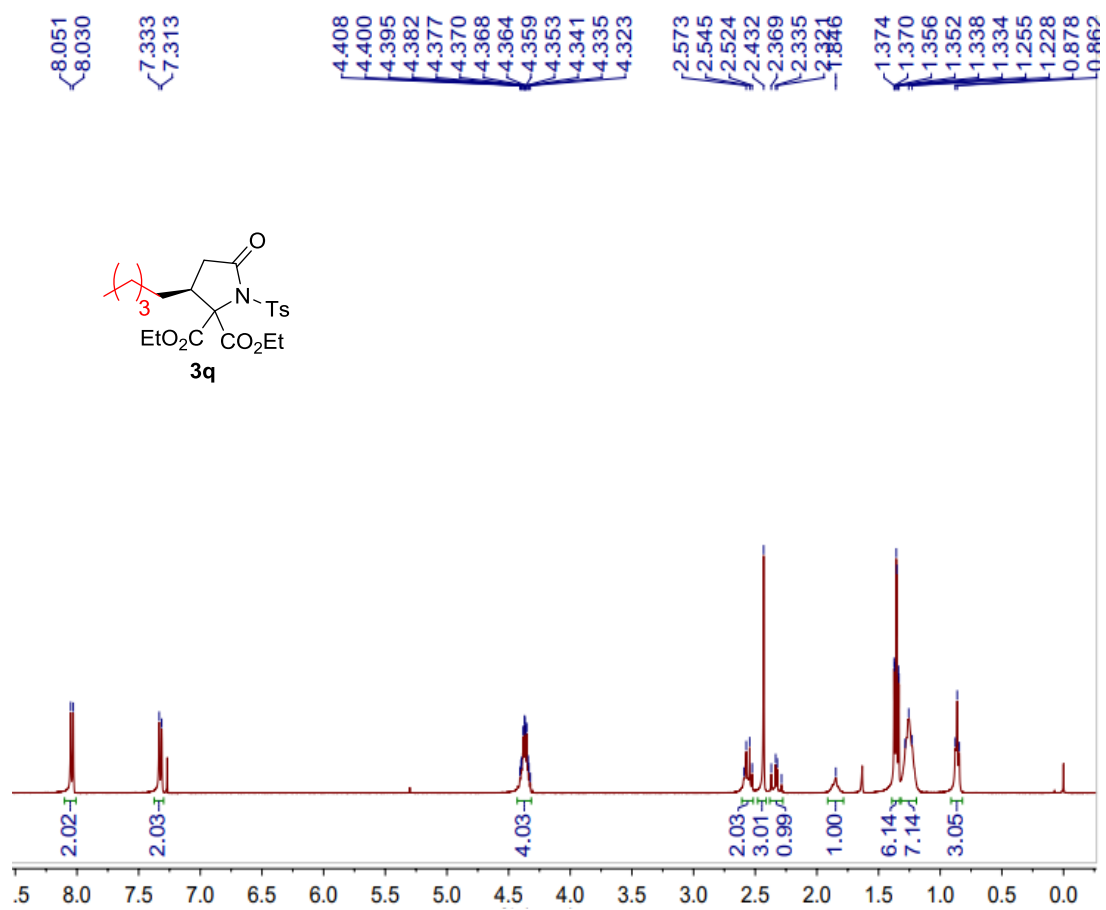

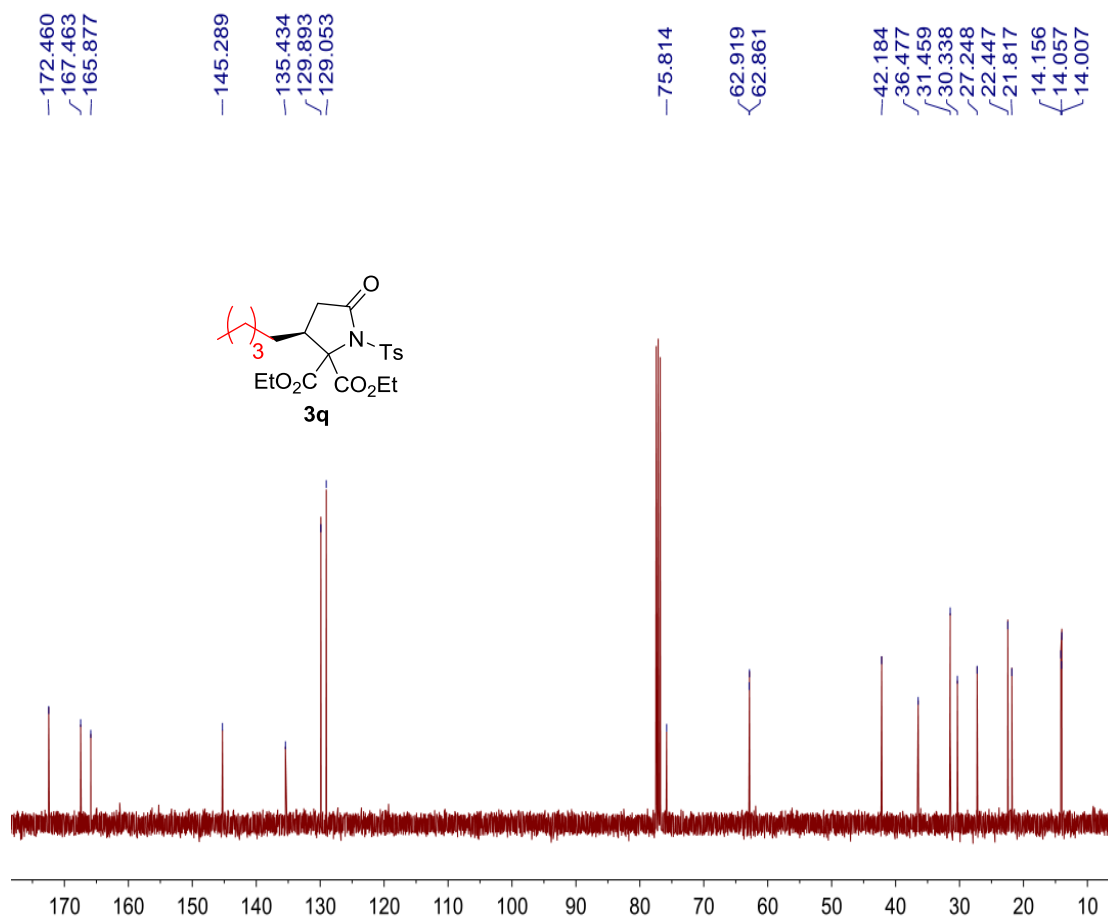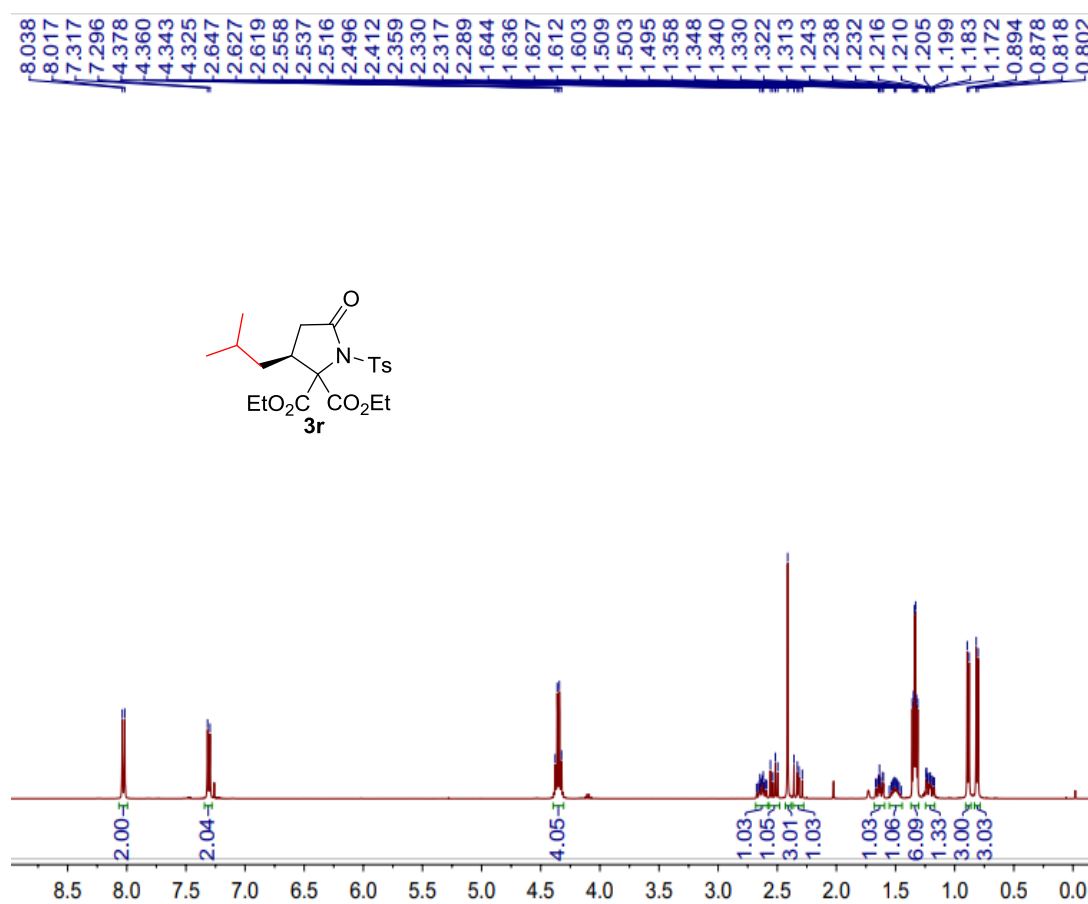

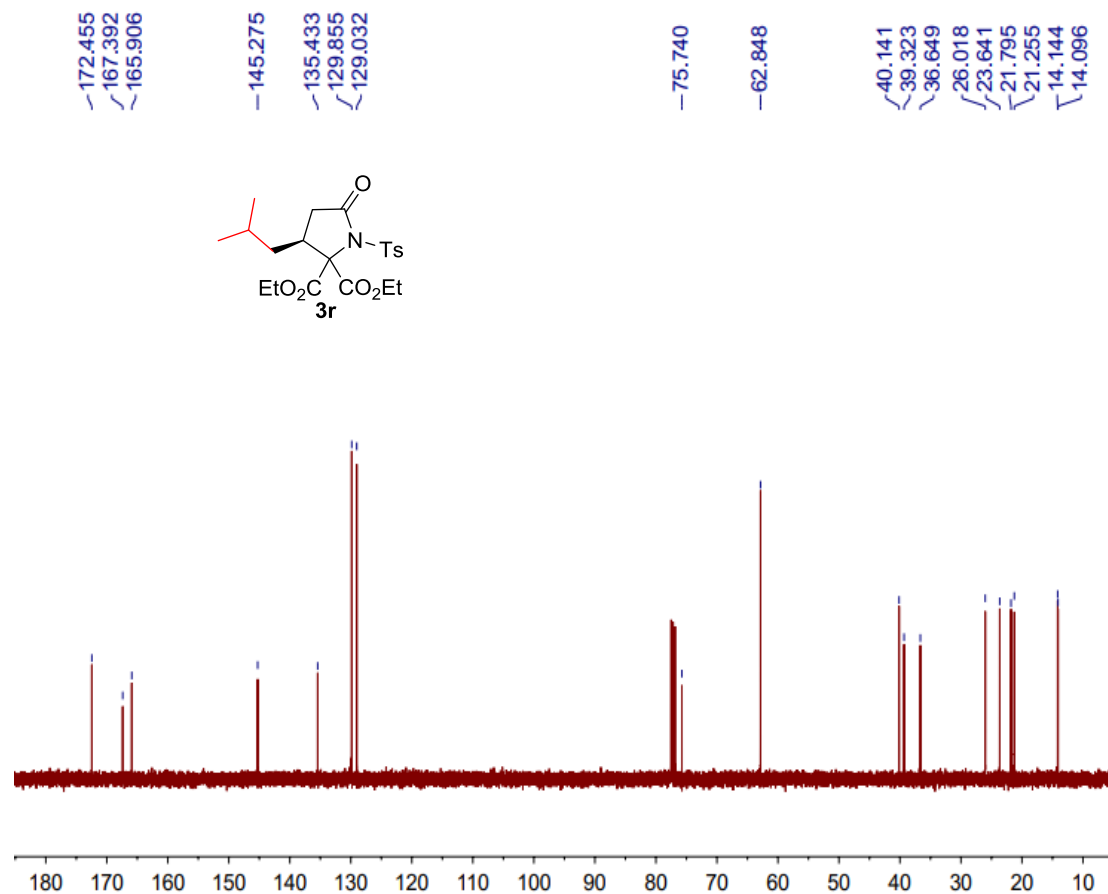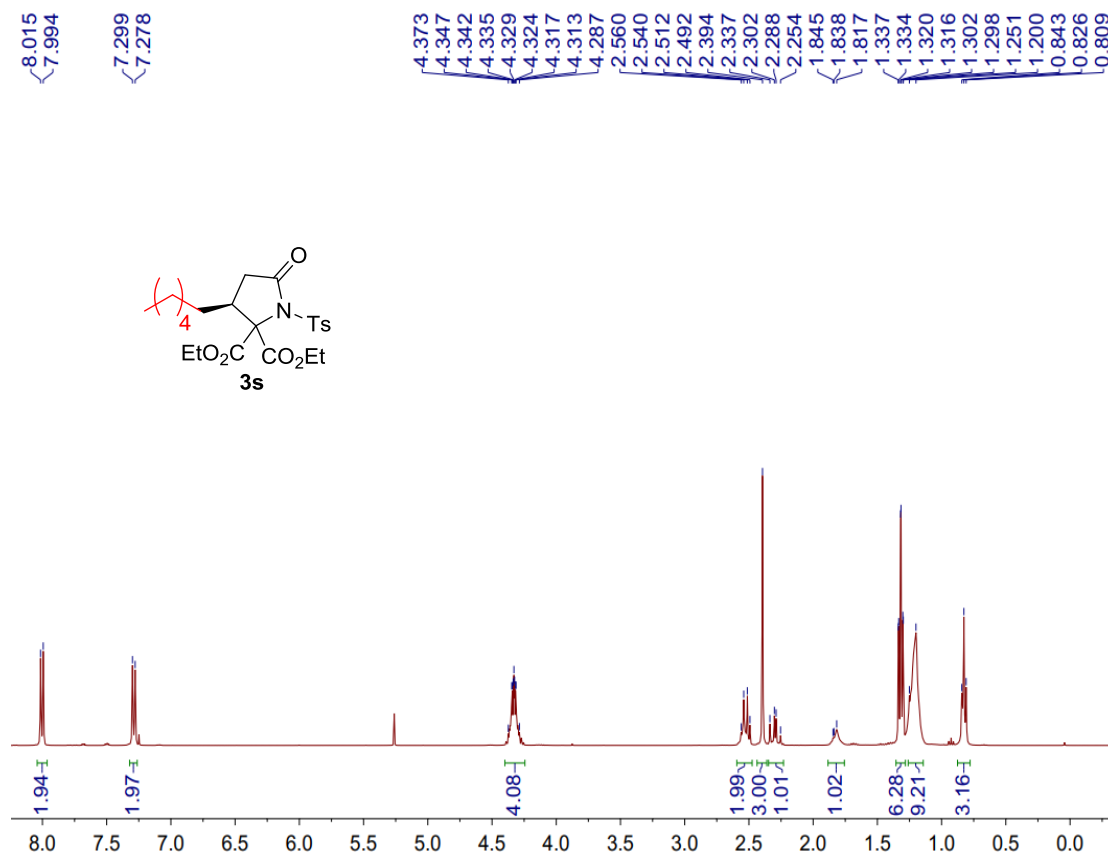

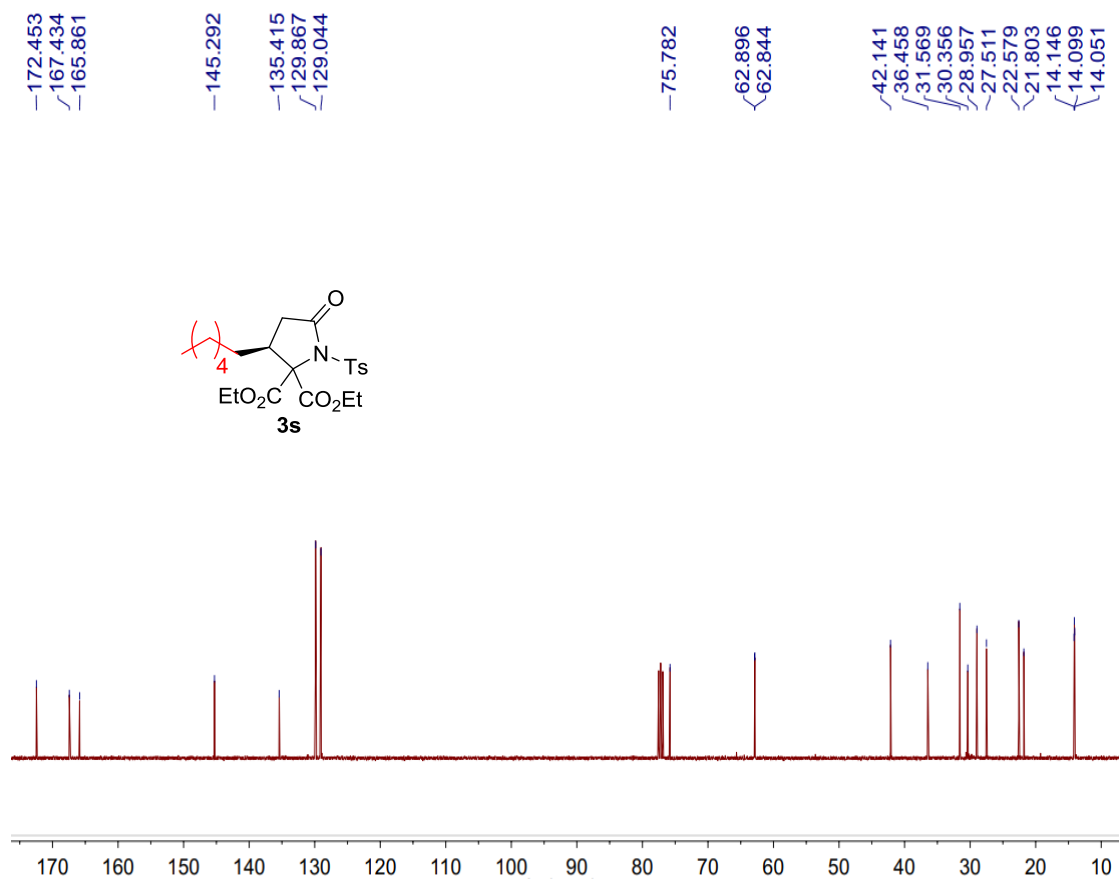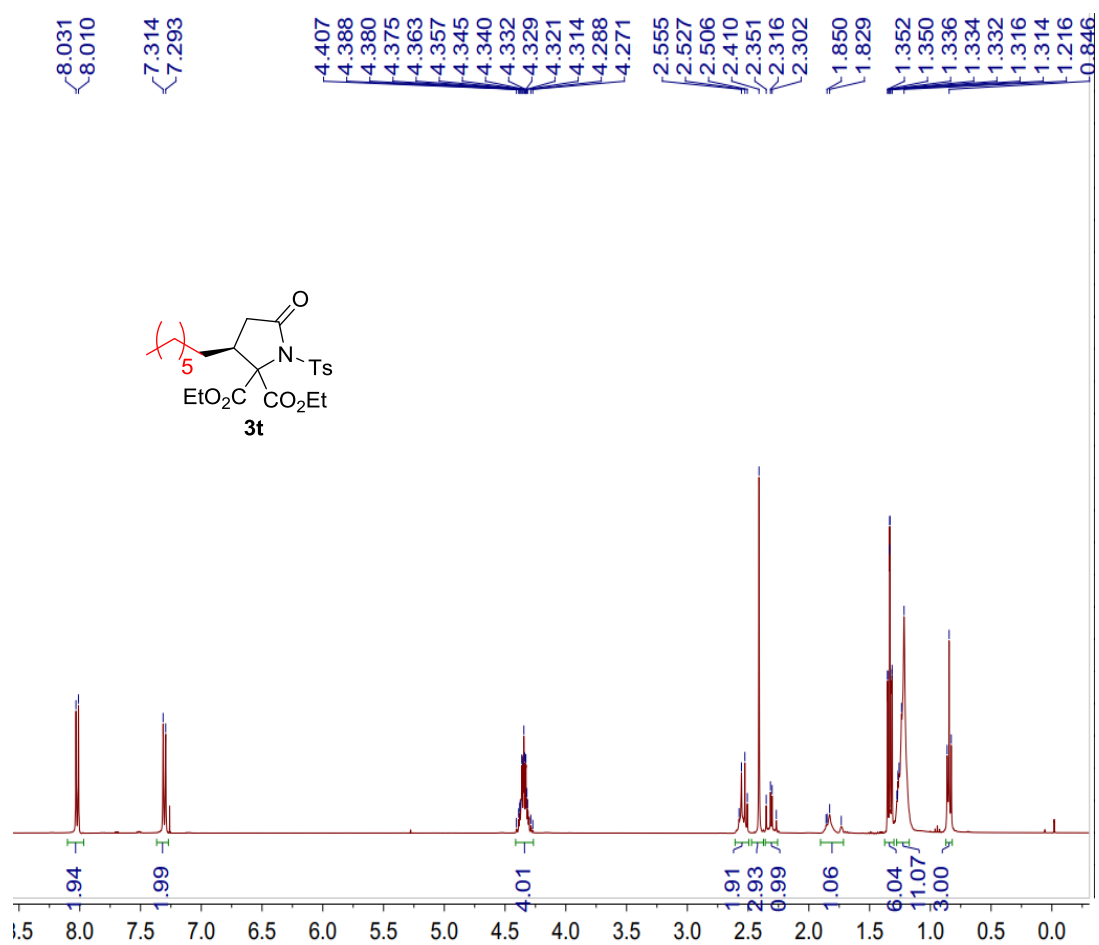

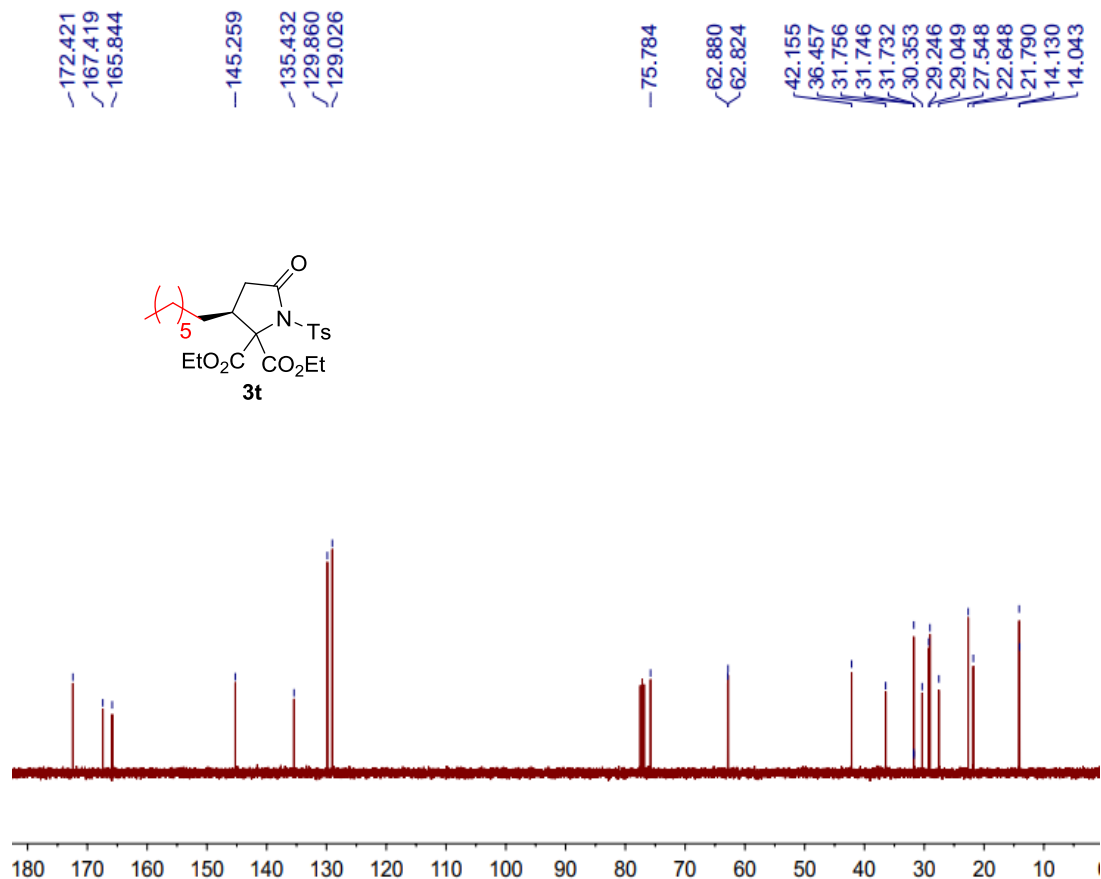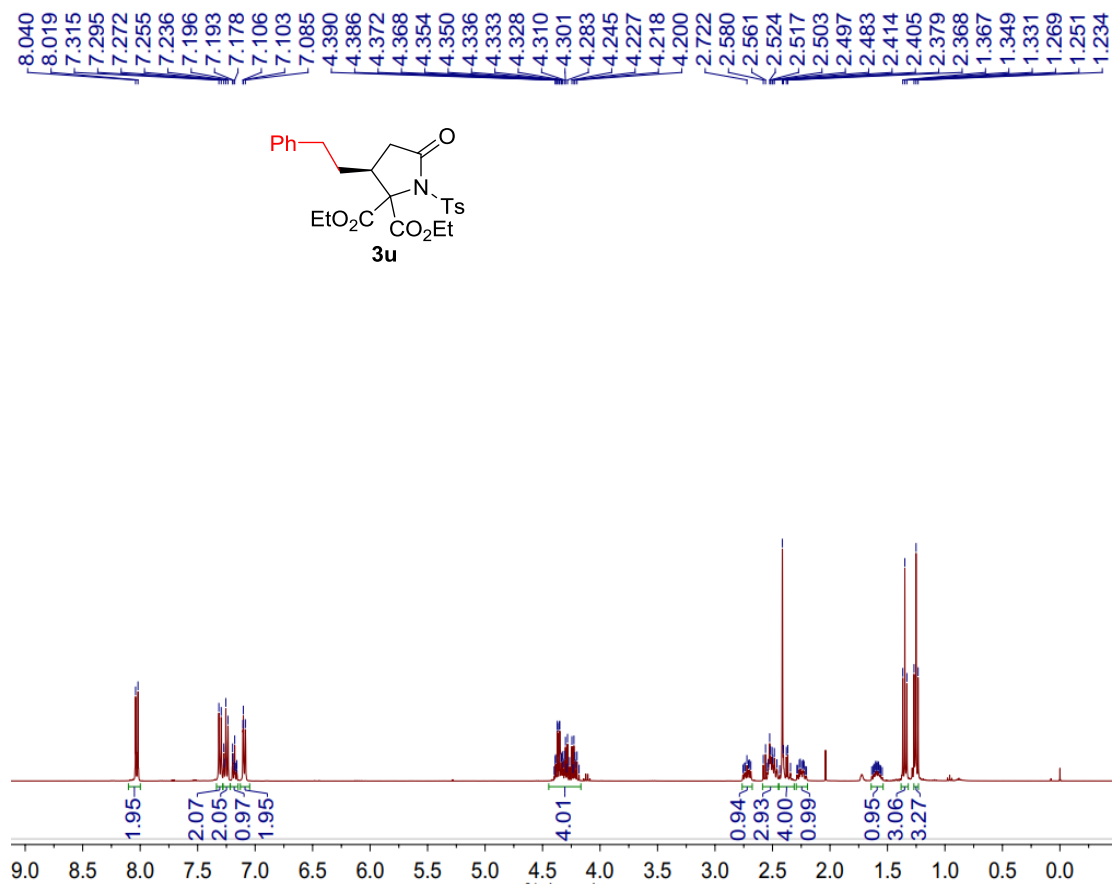

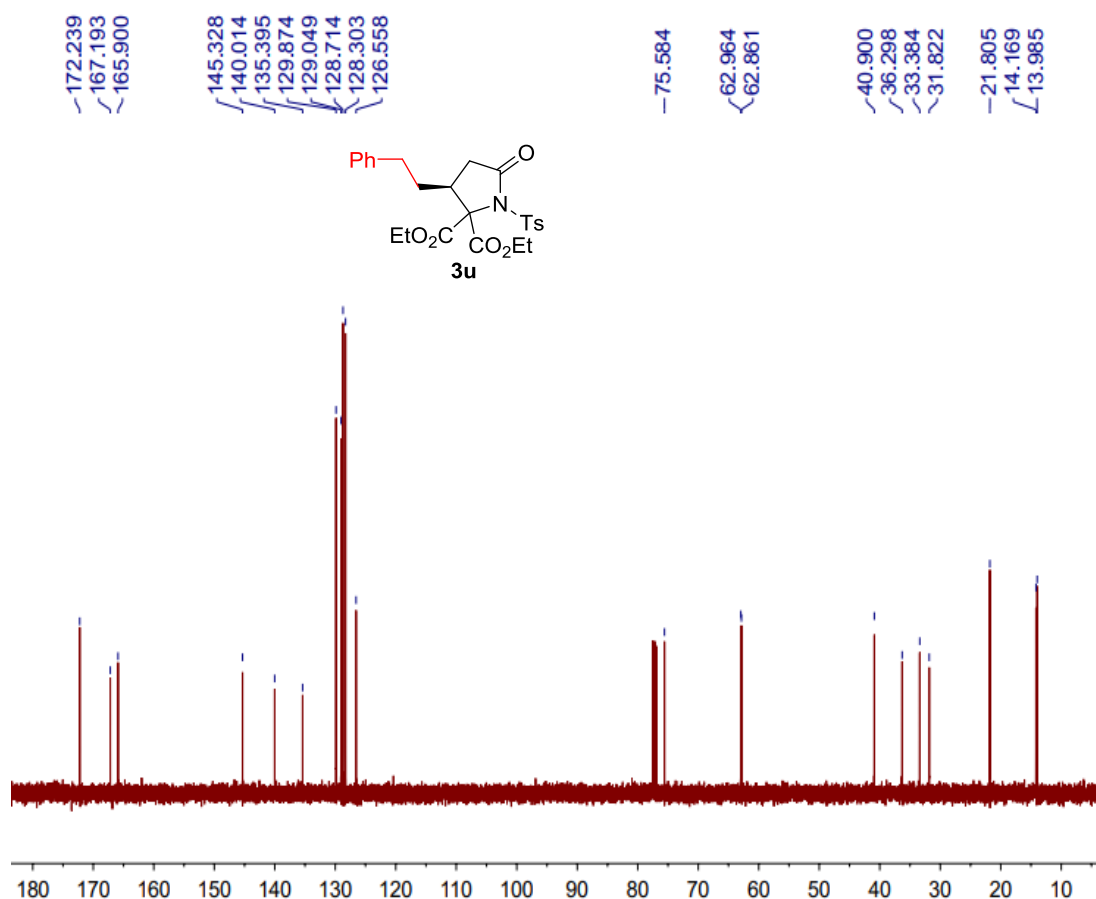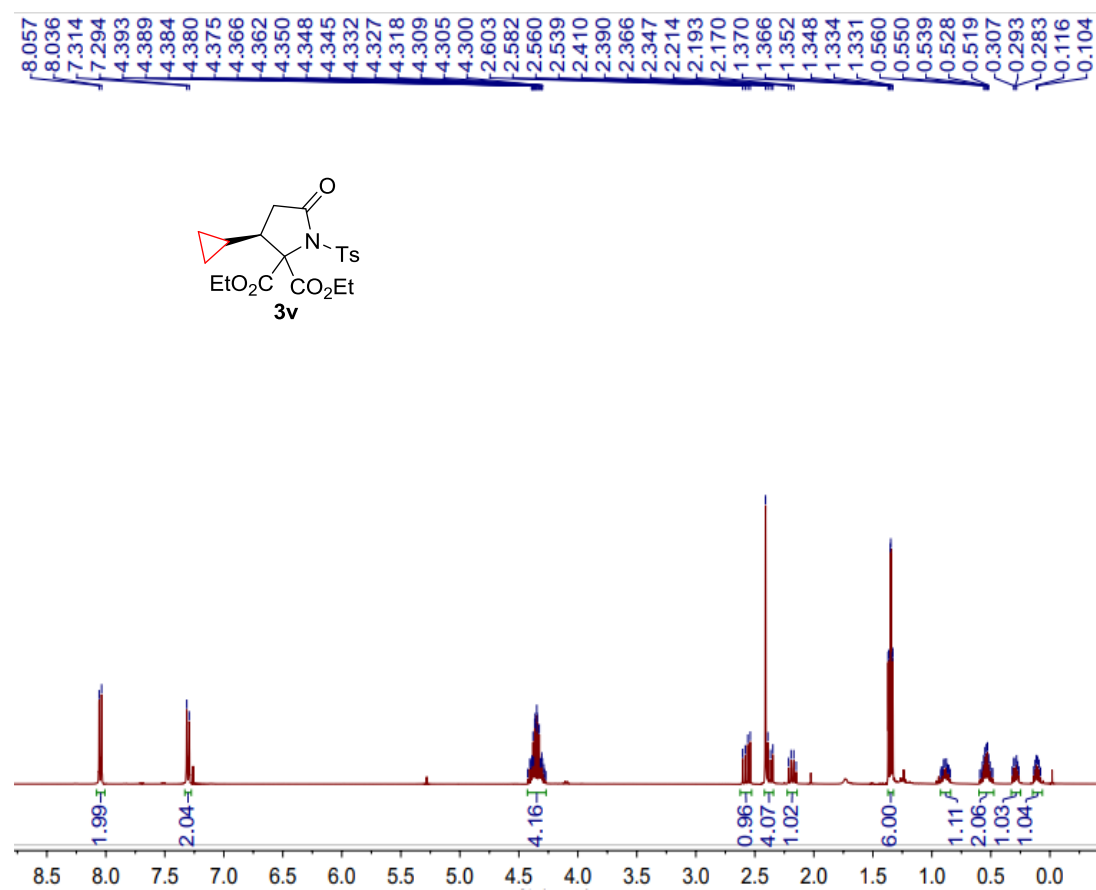



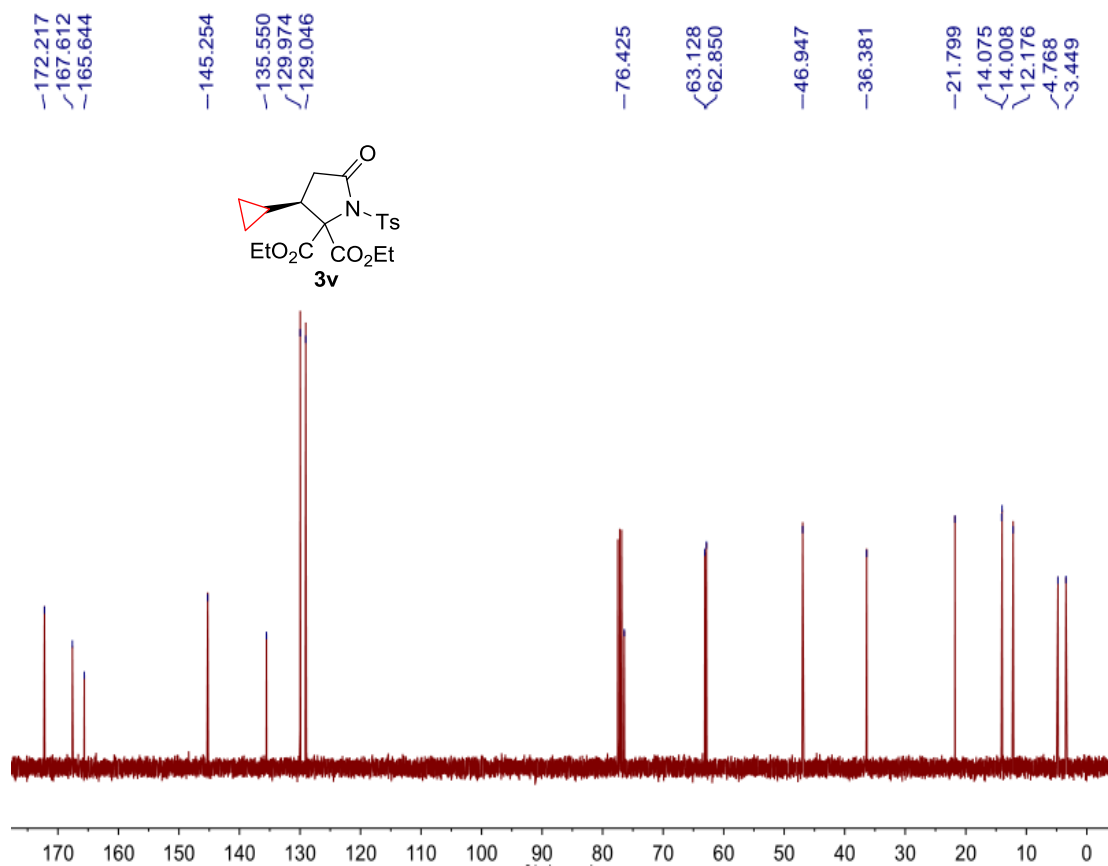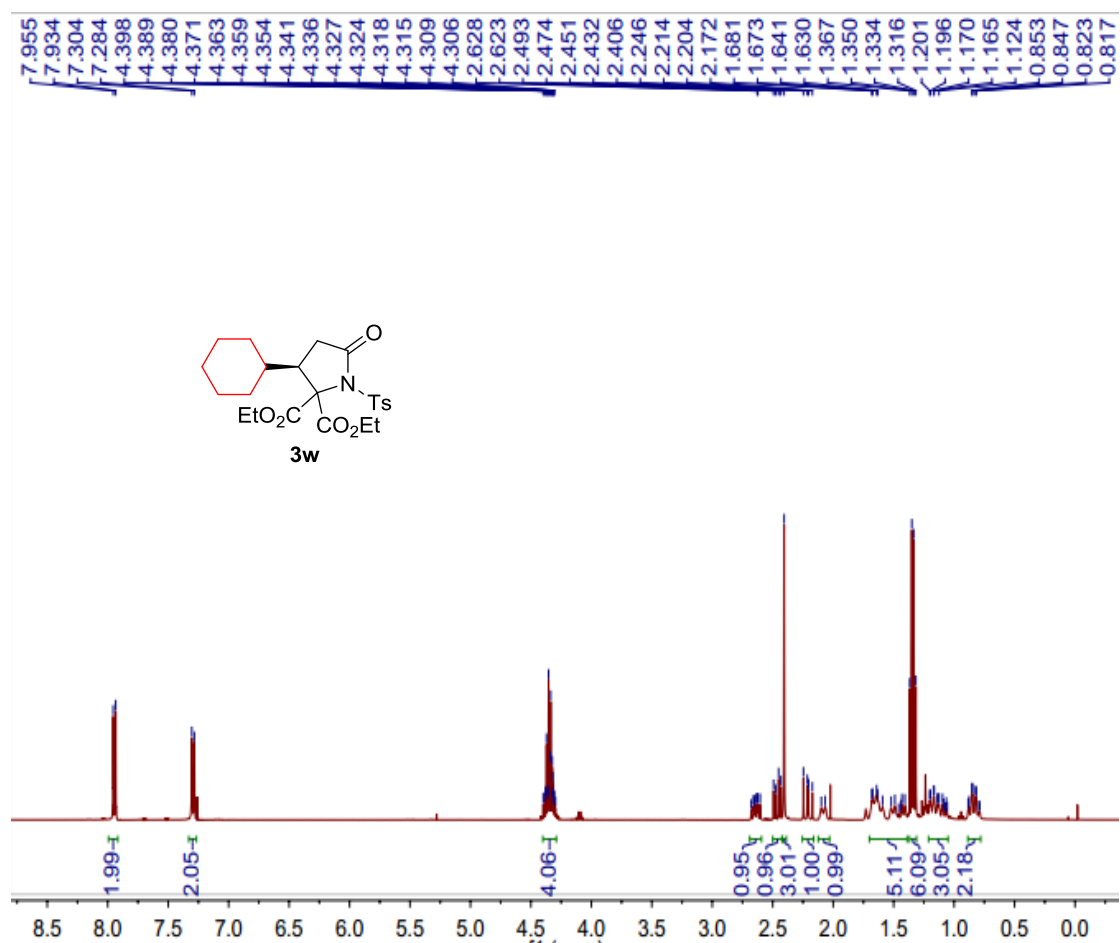

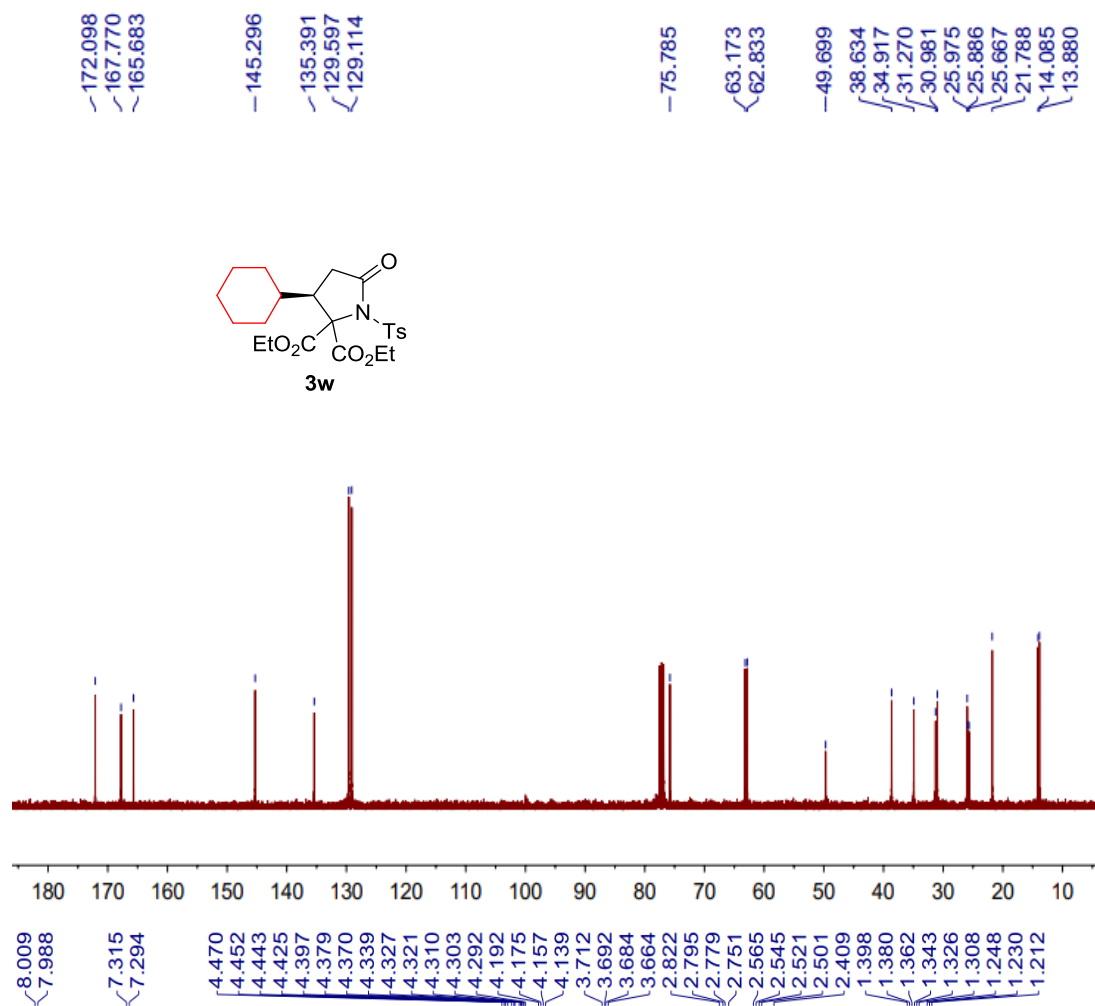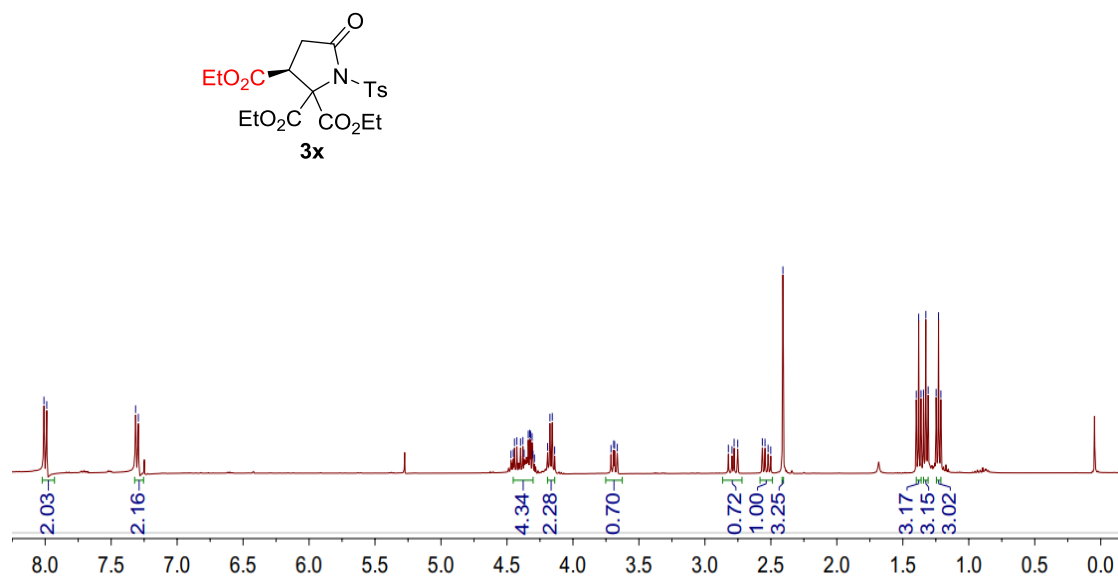

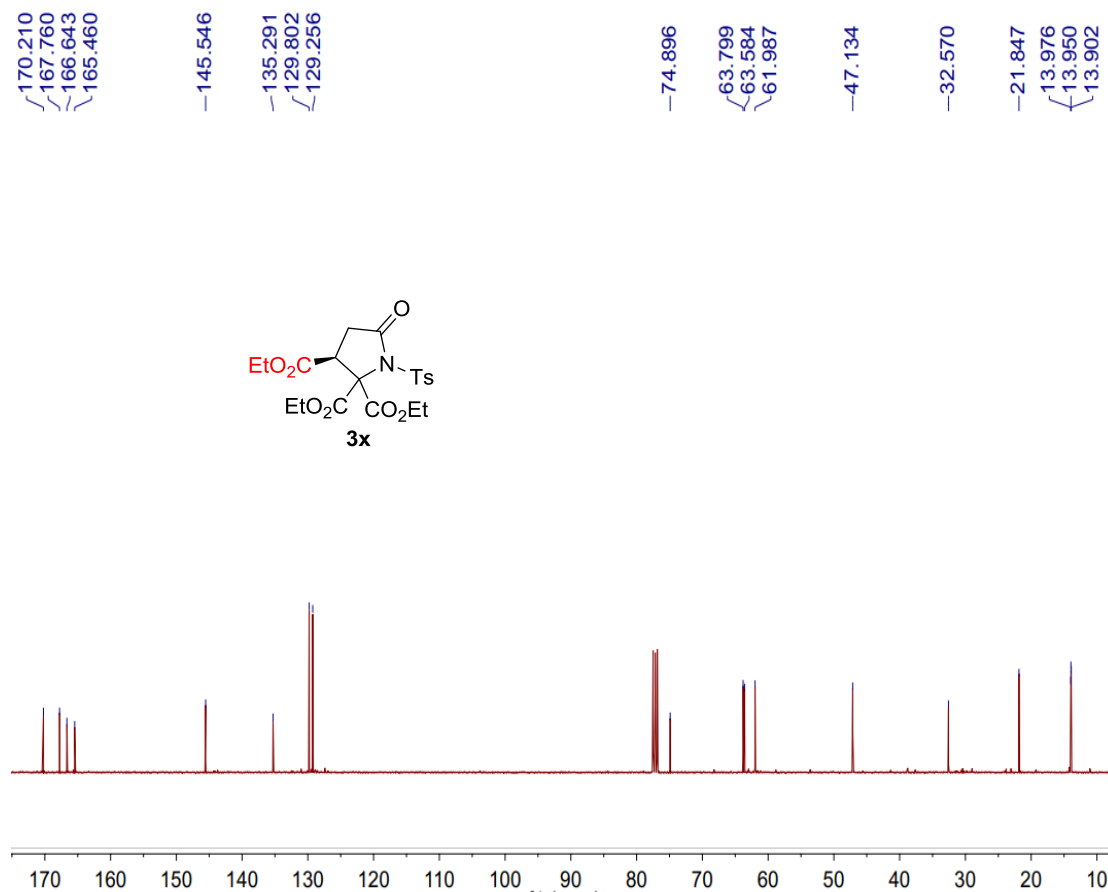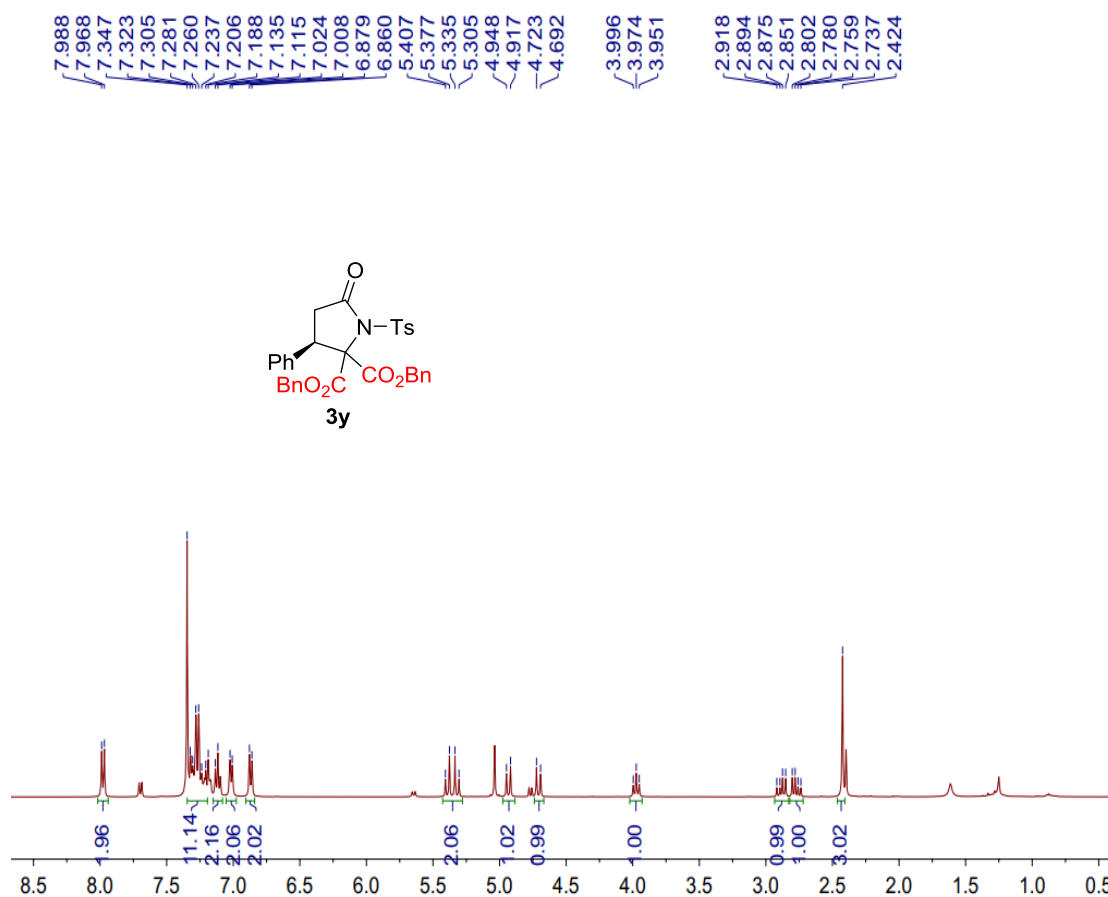

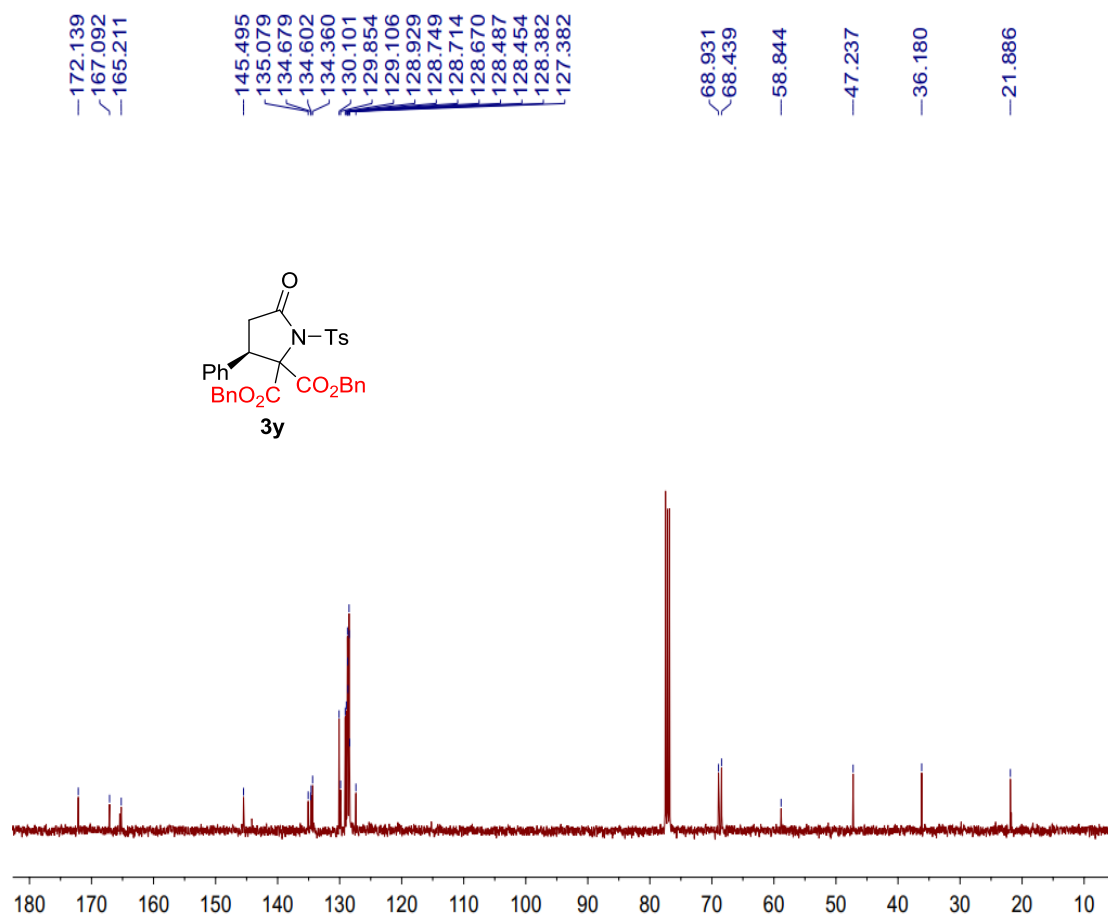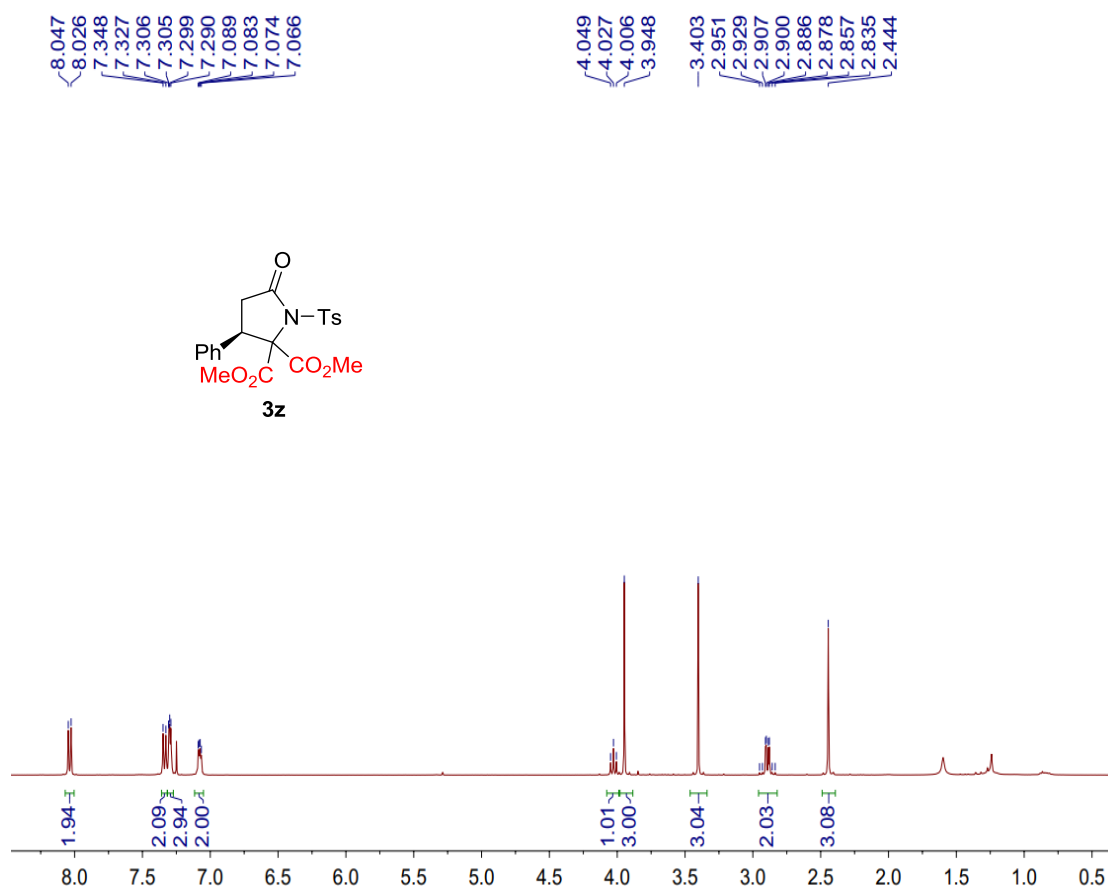

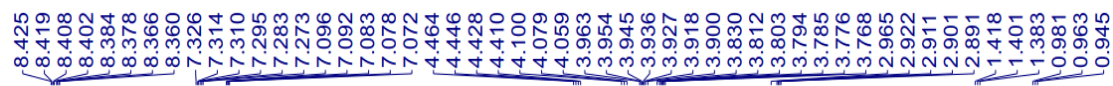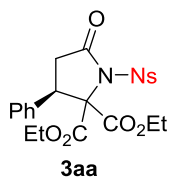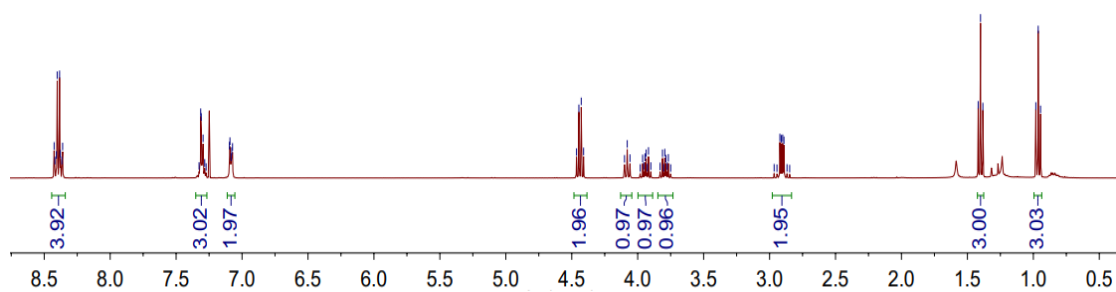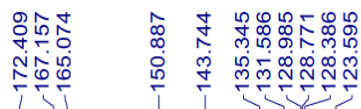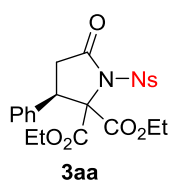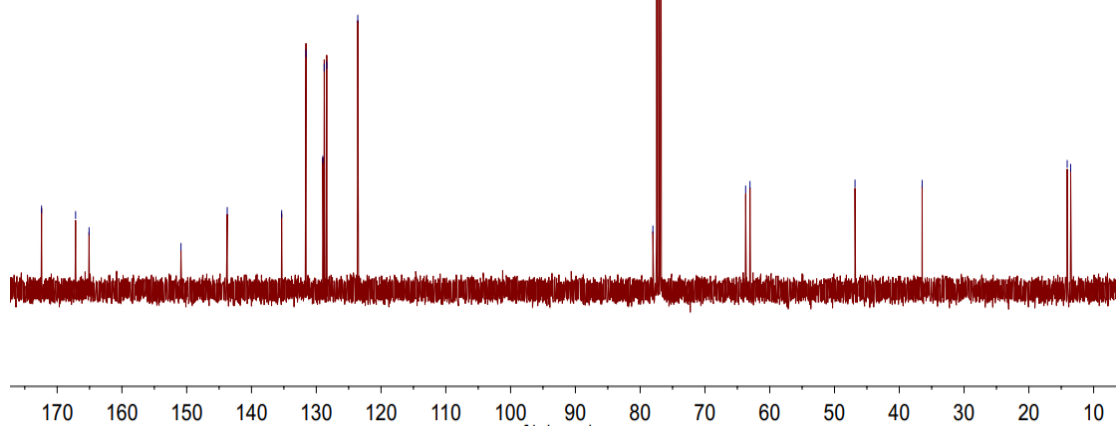

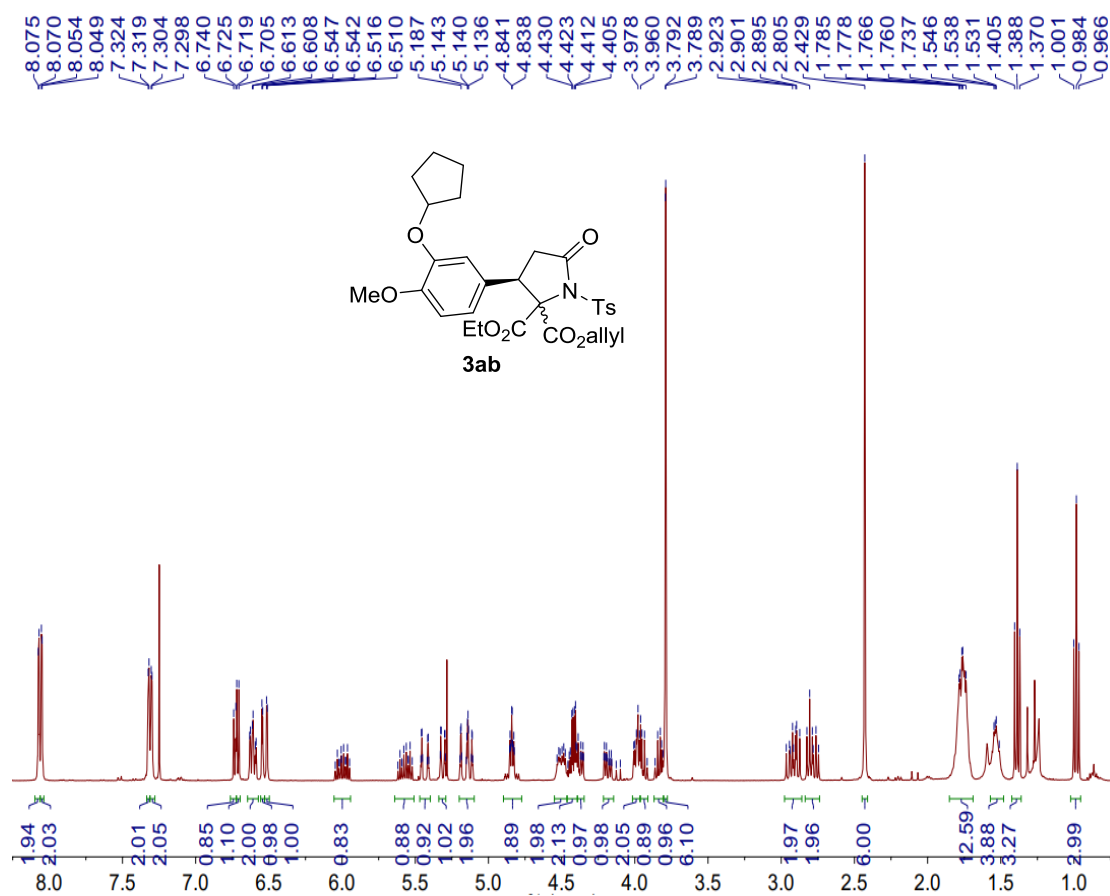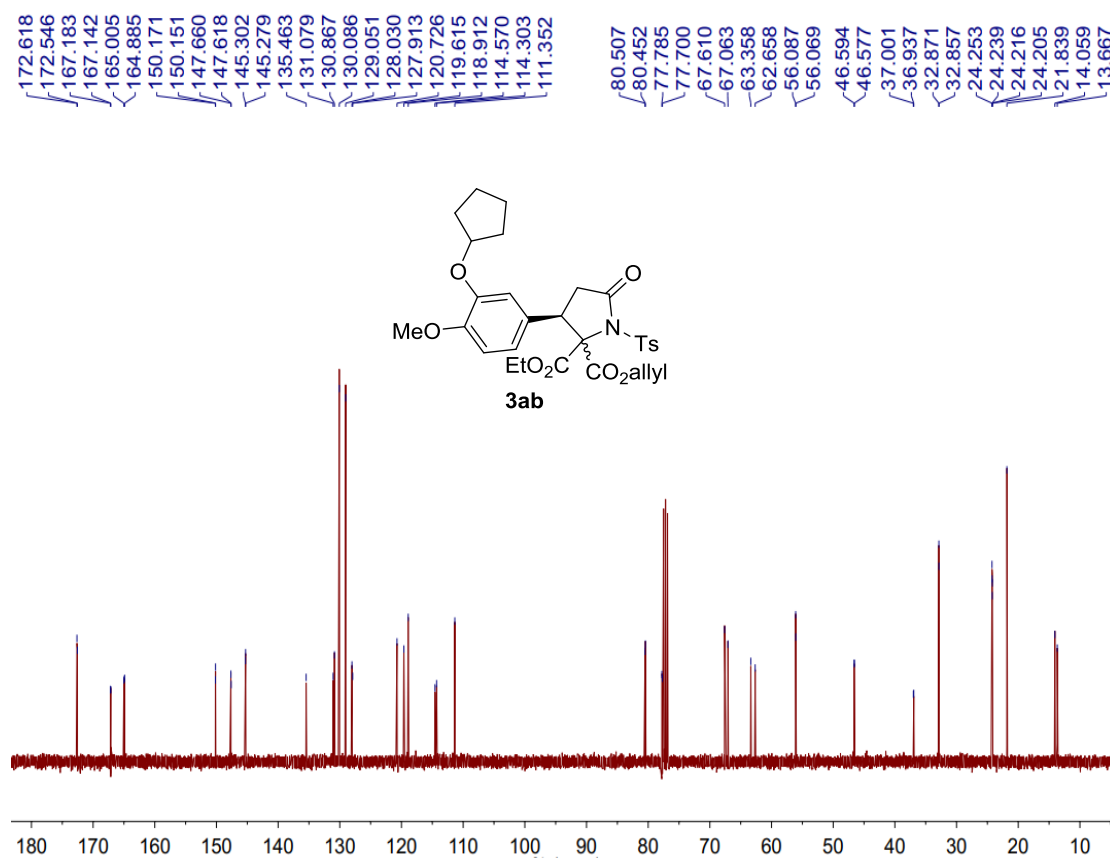

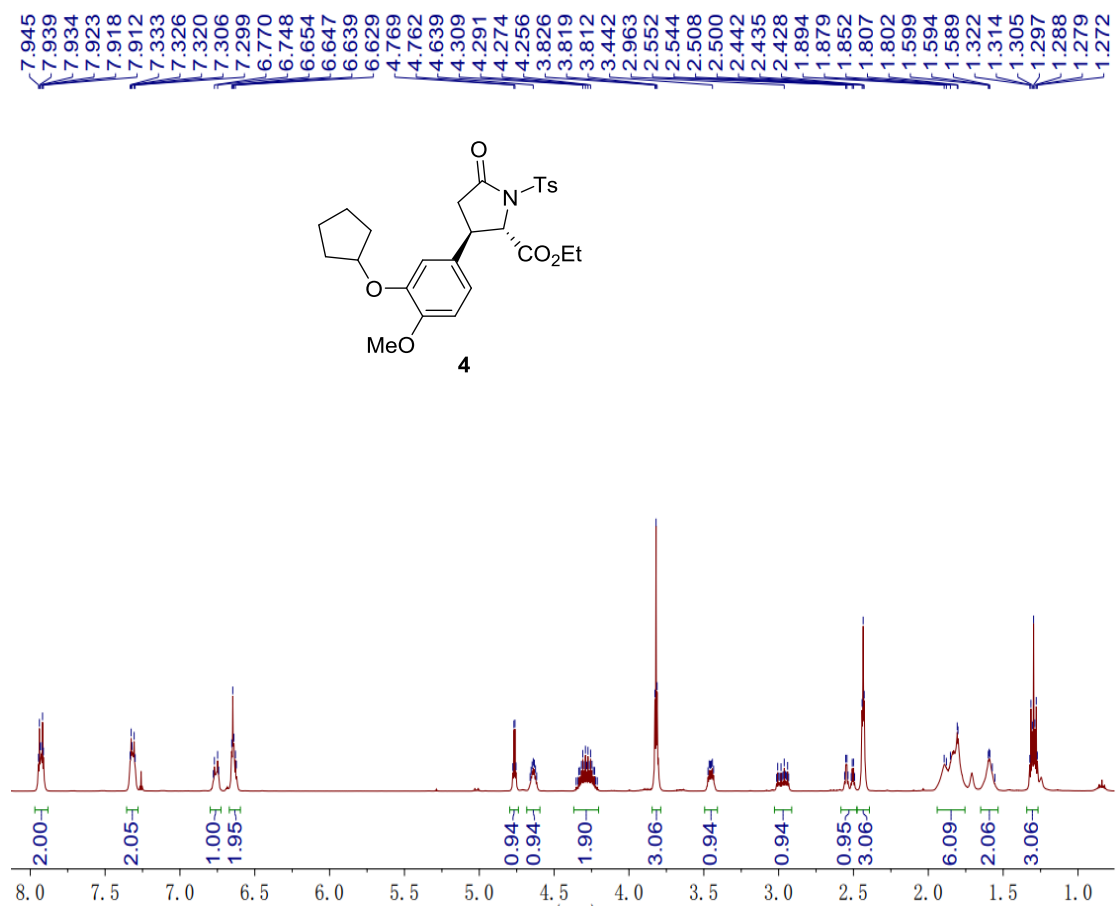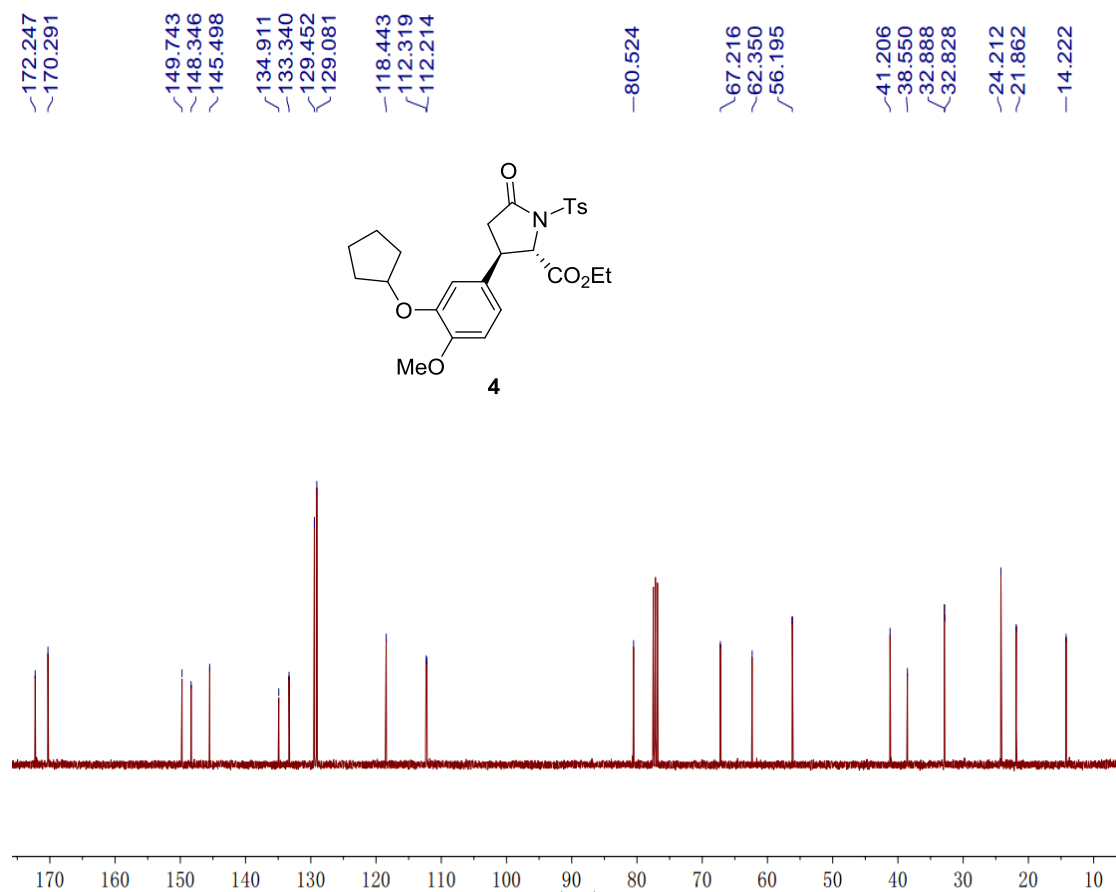

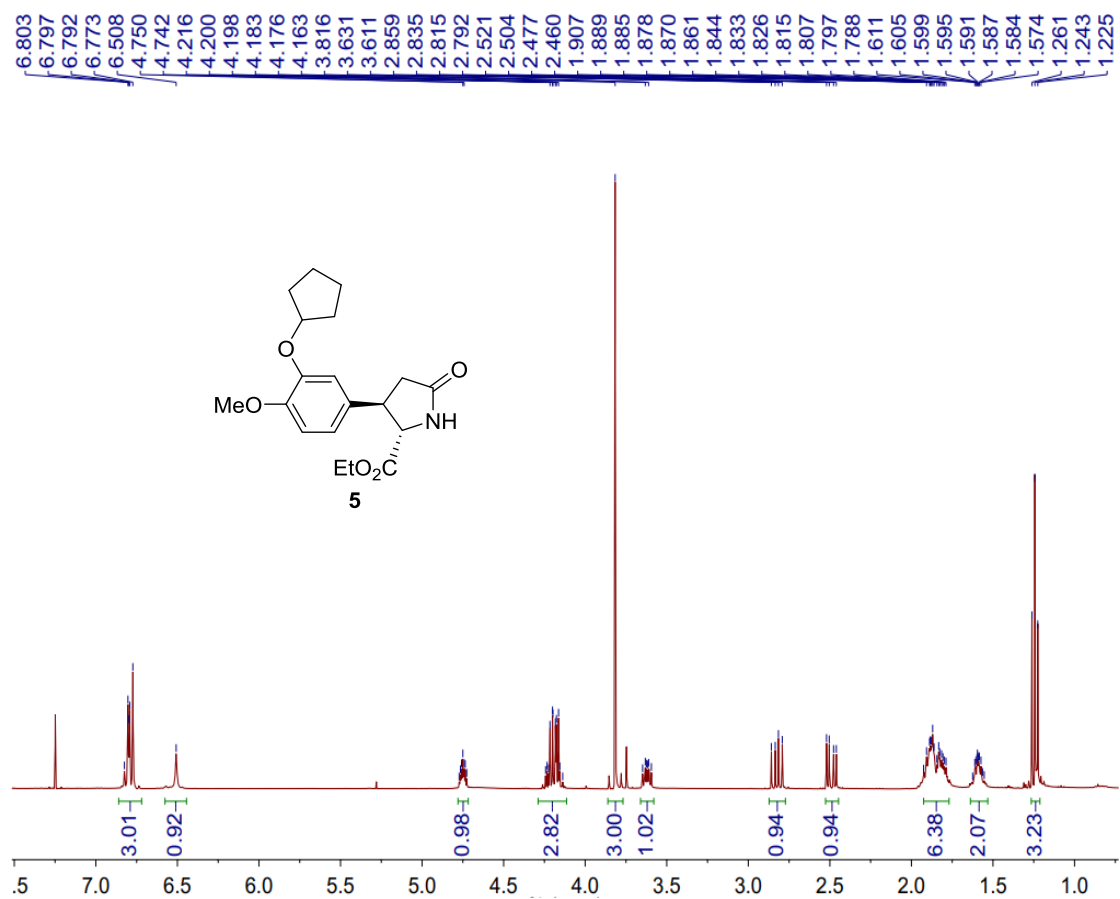



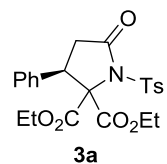

# <Chromatogram>

mAU

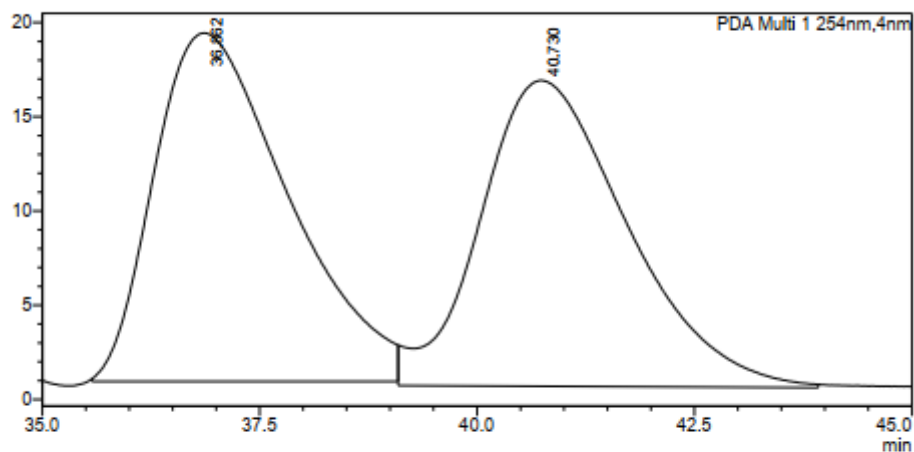

# <Peak Table>

PDA Ch1 254nm

| Peak# | Ret. Time | Area    | Height | Area%   |
|-------|-----------|---------|--------|---------|
| 1     | 36.862    | 1975895 | 18481  | 50.859  |
| 2     | 40.730    | 1909170 | 16226  | 49.141  |
| Total |           | 3885064 | 34707  | 100.000 |

# <Chromatogram>

mAU

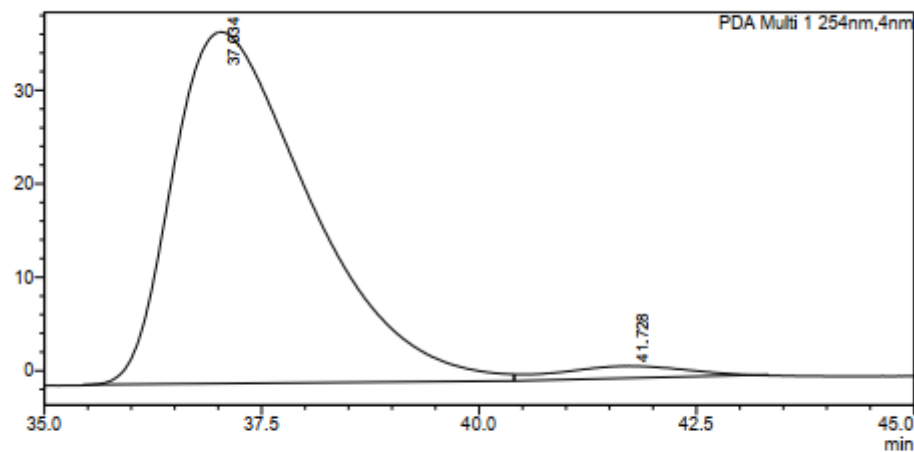

# <Peak Table>

PDA Ch1 254nm

| Peak# | Ret. Time | Area    | Height | Area%   |
|-------|-----------|---------|--------|---------|
| 1     | 37.034    | 4122589 | 37592  | 96.935  |
| 2     | 41.728    | 130336  | 1285   | 3.065   |
| Total |           | 4252925 | 38876  | 100.000 |

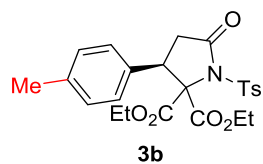

### <Chromatogram>

mAU

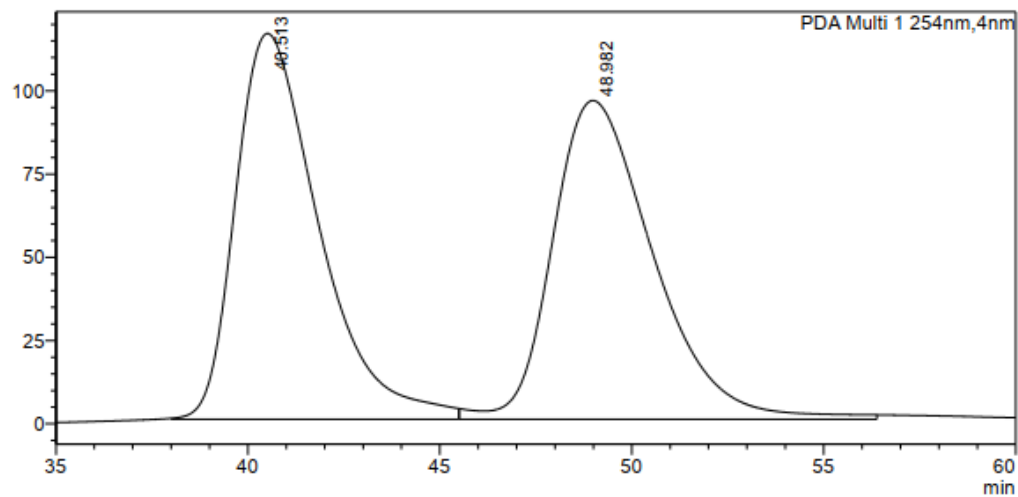

### <Peak Table>

PDA Ch1 254nm

| Peak# | Ret. Time | Area     | Area%   | Height |
|-------|-----------|----------|---------|--------|
| 1     | 40.513    | 17495276 | 49.981  | 115880 |
| 2     | 48.982    | 17508852 | 50.019  | 95729  |
| Total |           | 35004127 | 100.000 | 211608 |

### <Chromatogram>

mAU

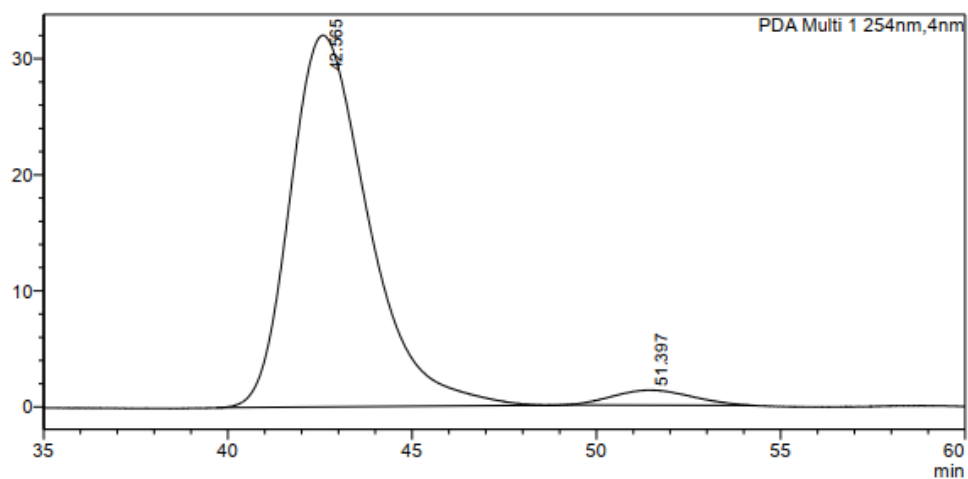

### <Peak Table>

PDA Ch1 254nm

| Peak# | Ret. Time | Area    | Area%   | Height |
|-------|-----------|---------|---------|--------|
| 1     | 42.565    | 4724860 | 96.073  | 32007  |
| 2     | 51.397    | 193105  | 3.927   | 1295   |
| Total |           | 4917965 | 100.000 | 33301  |

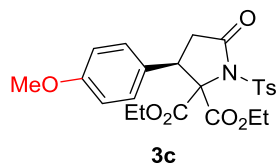

### <Chromatogram>

mAU

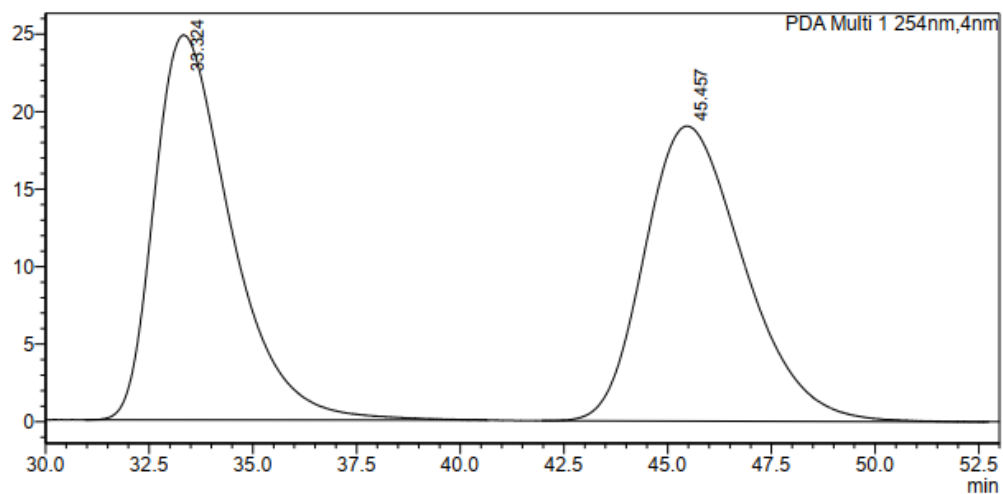

### <Peak Table>

PDA Ch1 254nm

| Peak# | Ret. Time | Area    | Area%   | Height |
|-------|-----------|---------|---------|--------|
| 1     | 33.324    | 3190919 | 50.093  | 24831  |
| 2     | 45.457    | 3179040 | 49.907  | 19028  |
| Total |           | 6369960 | 100.000 | 43858  |

### <Chromatogram>

mAU

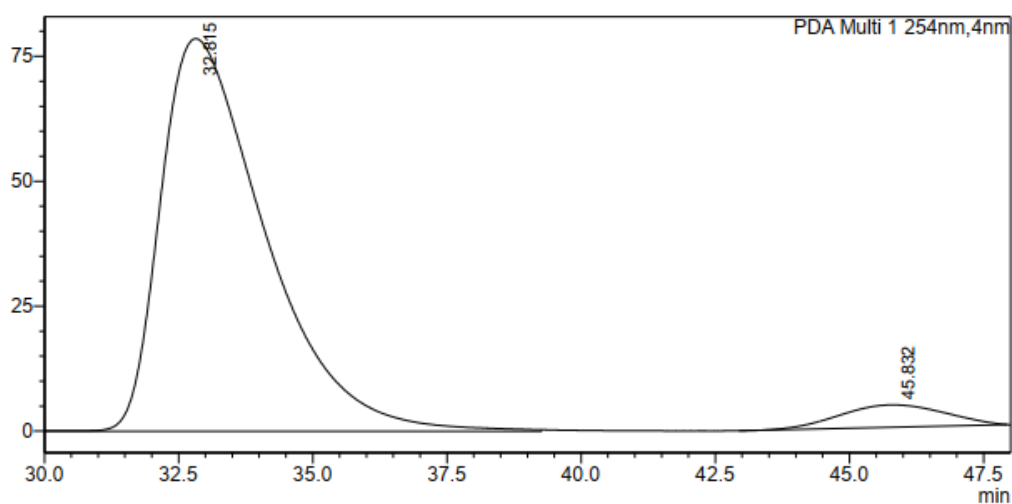

### <Peak Table>

PDA Ch1 254nm

| Peak# | Ret. Time | Area     | Area%   | Height |
|-------|-----------|----------|---------|--------|
| 1     | 32.815    | 10668798 | 94.614  | 78581  |
| 2     | 45.832    | 607342   | 5.386   | 4476   |
| Total |           | 11276140 | 100.000 | 83058  |

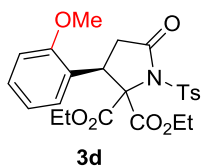

### <Chromatogram>

mAU

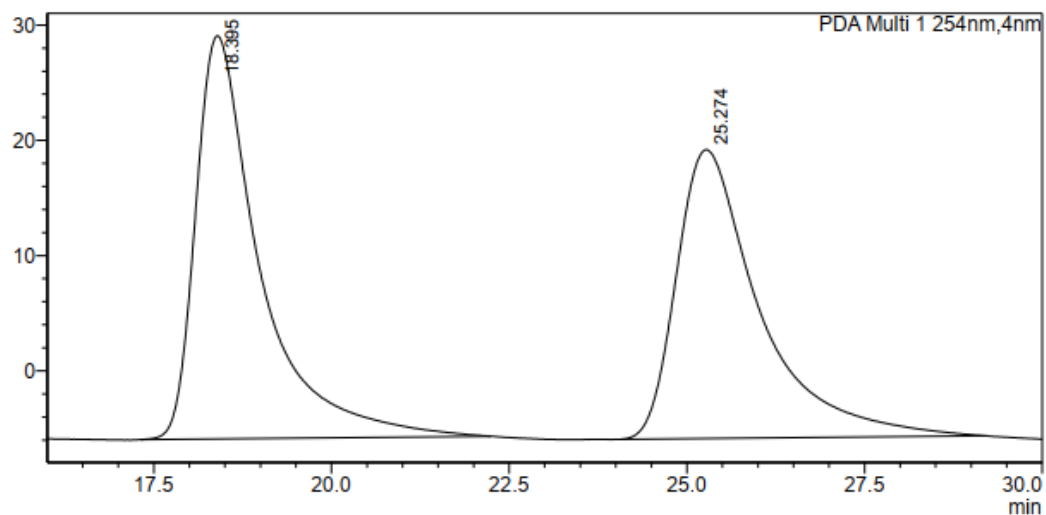

### <Peak Table>

PDA Ch1 254nm

| Peak# | Ret. Time | Area    | Height | Area%   |
|-------|-----------|---------|--------|---------|
| 1     | 18.395    | 2200911 | 34963  | 51.908  |
| 2     | 25.274    | 2039111 | 25051  | 48.092  |
| Total |           | 4240021 | 60013  | 100.000 |

### <Chromatogram>

mAU

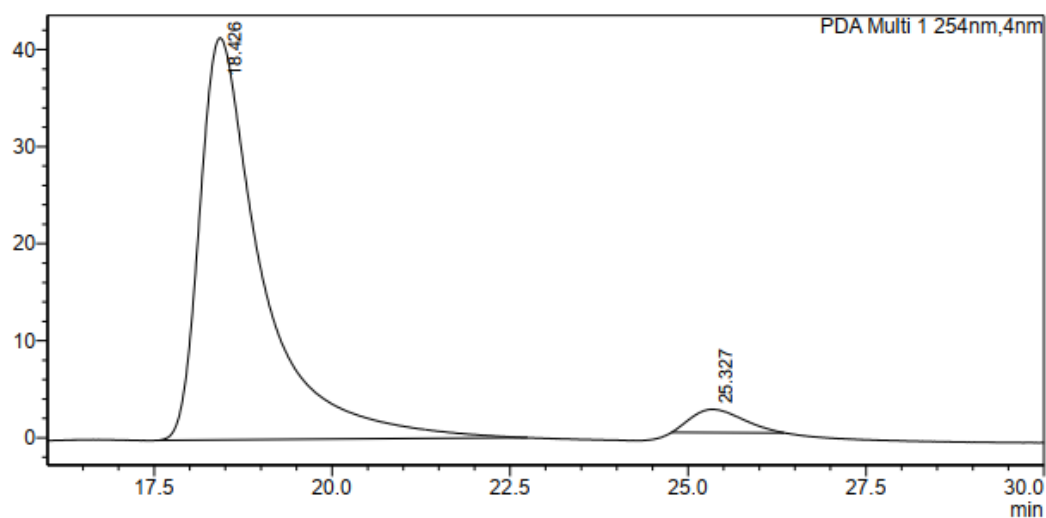

### <Peak Table>

PDA Ch1 254nm

| Peak# | Ret. Time | Area    | Height | Area%   |
|-------|-----------|---------|--------|---------|
| 1     | 18.426    | 2525357 | 41420  | 95.440  |
| 2     | 25.327    | 120668  | 2391   | 4.560   |
| Total |           | 2646025 | 43811  | 100.000 |

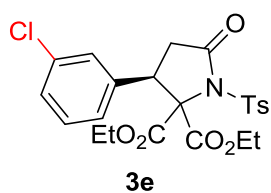

### <Chromatogram>

mAU

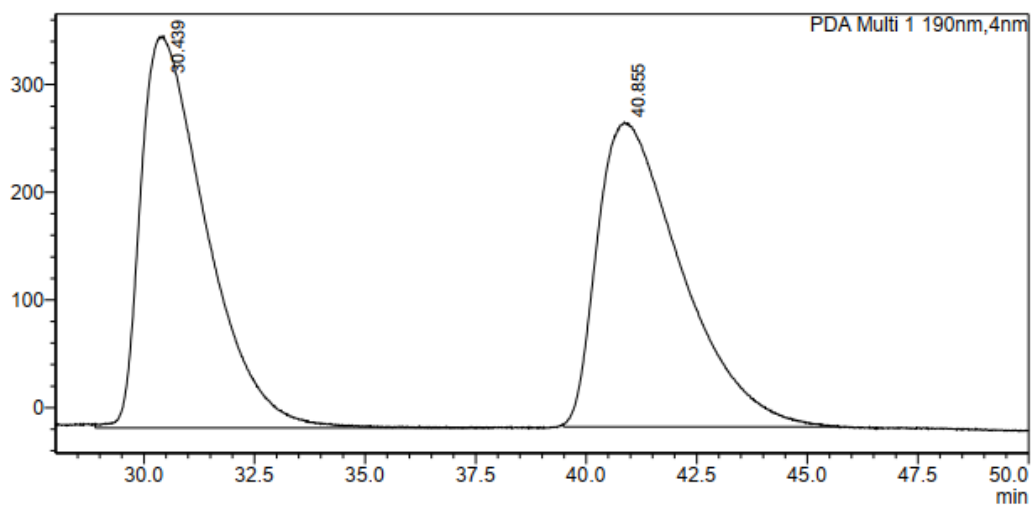

### <Peak Table>

PDA Ch1 190nm

| Peak# | Ret. Time | Area     | Area%   | Height |
|-------|-----------|----------|---------|--------|
| 1     | 30.439    | 37610210 | 50.094  | 363829 |
| 2     | 40.855    | 37469676 | 49.906  | 282481 |
| Total |           | 75079887 | 100.000 | 646310 |

### <Chromatogram>

mAU

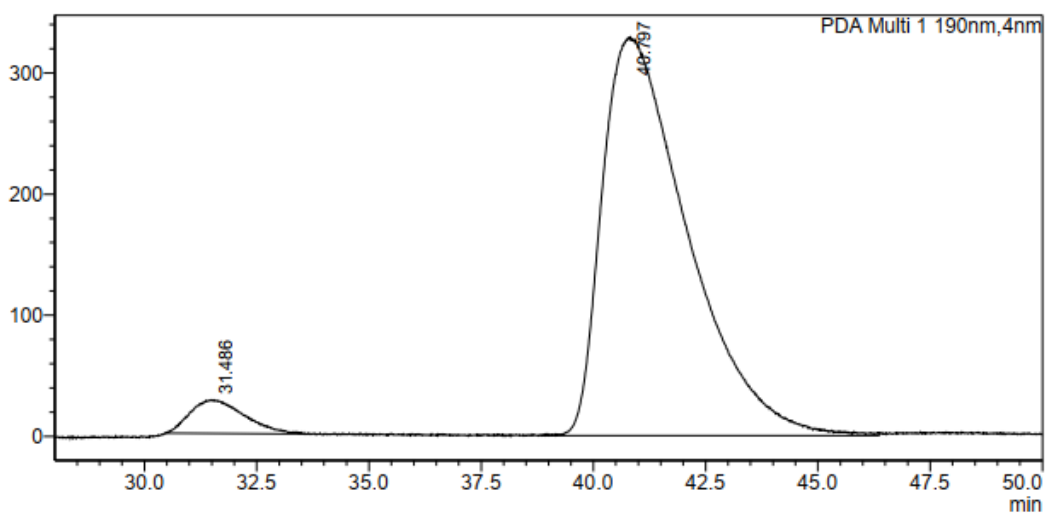

### <Peak Table>

PDA Ch1 190nm

| Peak# | Ret. Time | Area     | Area%   | Height |
|-------|-----------|----------|---------|--------|
| 1     | 31.486    | 2326632  | 5.081   | 27686  |
| 2     | 40.797    | 43462886 | 94.919  | 328492 |
| Total |           | 45789517 | 100.000 | 356178 |

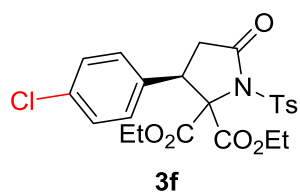

### <Chromatogram>

mAU

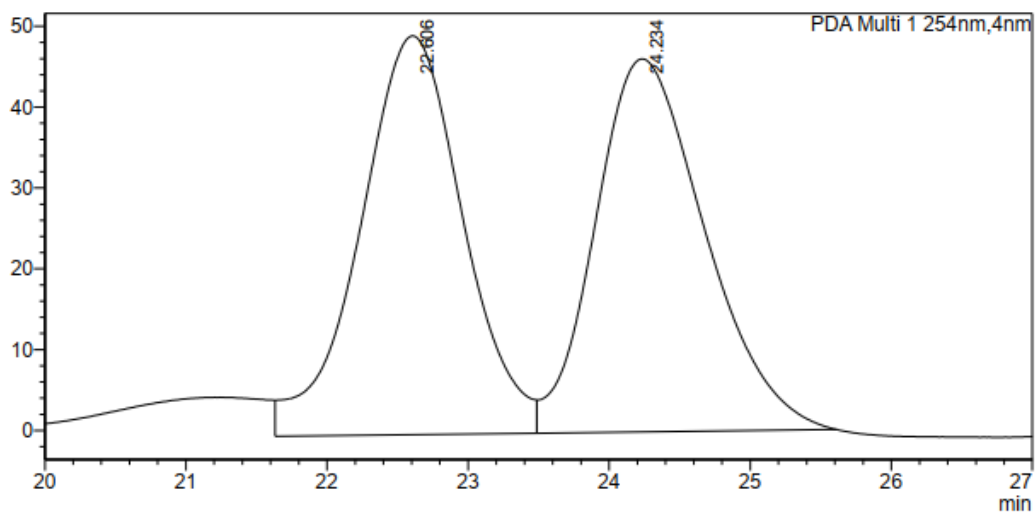

### <Peak Table>

PDA Ch1 254nm

| Peak# | Ret. Time | Area    | Area%   | Height |
|-------|-----------|---------|---------|--------|
| 1     | 22.606    | 2499057 | 50.093  | 49334  |
| 2     | 24.234    | 2489790 | 49.907  | 46142  |
| Total |           | 4988847 | 100.000 | 95476  |

### <Chromatogram>

mAU

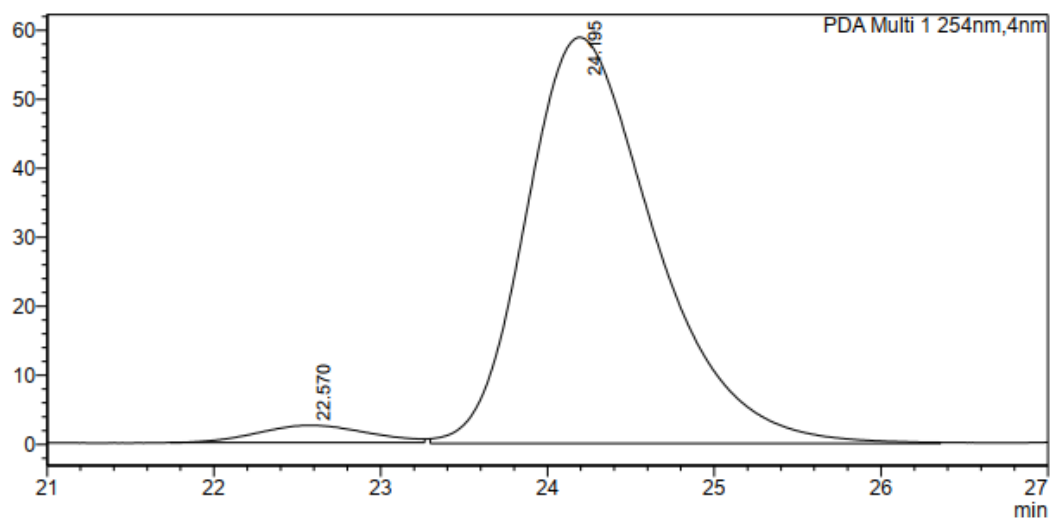

### <Peak Table>

PDA Ch1 254nm

| Peak# | Ret. Time | Area    | Area%   | Height |
|-------|-----------|---------|---------|--------|
| 1     | 22.570    | 114887  | 3.511   | 2497   |
| 2     | 24.195    | 3157466 | 96.489  | 58859  |
| Total |           | 3272353 | 100.000 | 61356  |

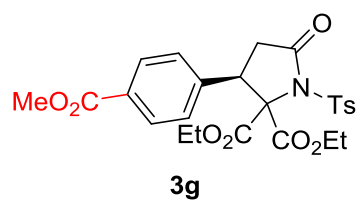

### <Chromatogram>

mAU

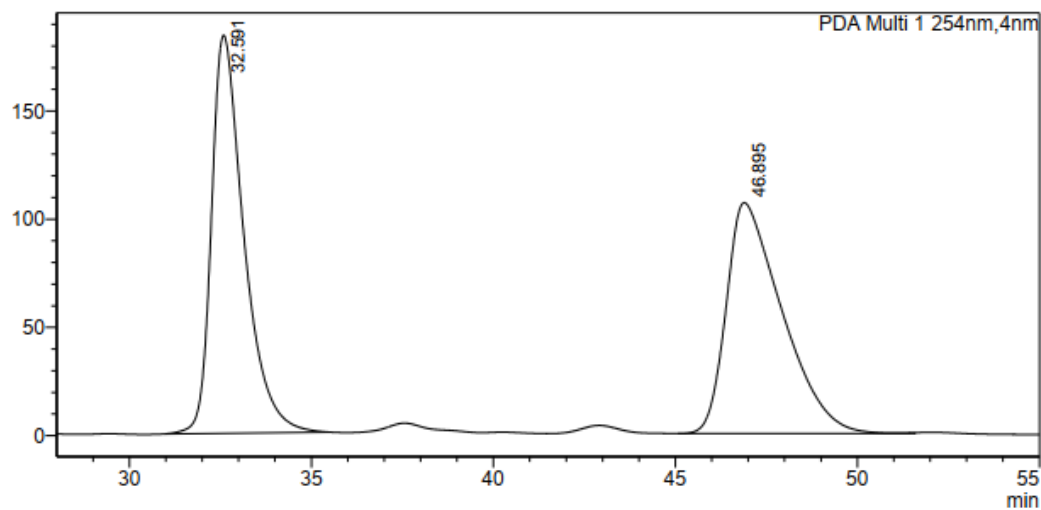

### <Peak Table>

PDA Ch1 254nm

| Peak# | Ret. Time | Area     | Area%   | Height |
|-------|-----------|----------|---------|--------|
| 1     | 32.591    | 11405105 | 50.058  | 183846 |
| 2     | 46.895    | 11378724 | 49.942  | 106568 |
| Total |           | 22783830 | 100.000 | 290414 |

### <Chromatogram>

mAU

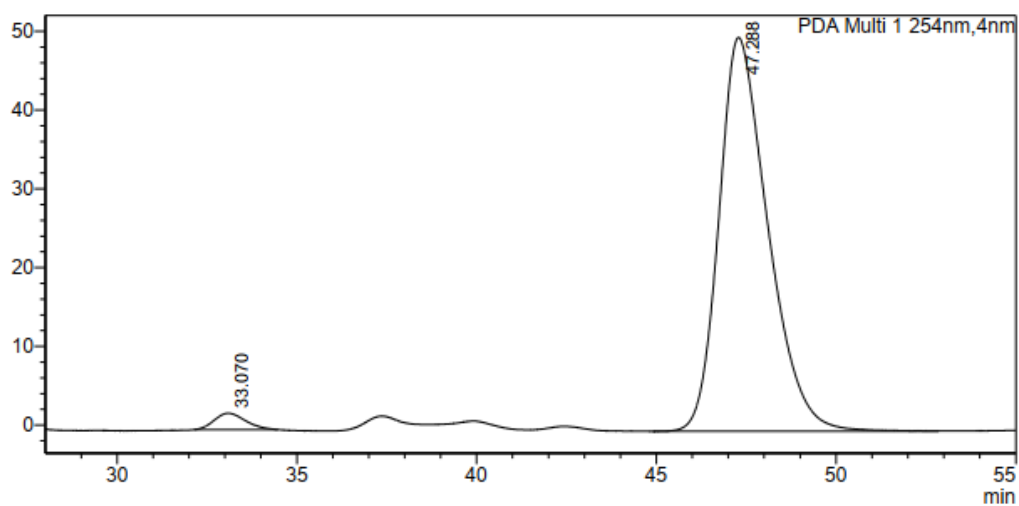

### <Peak Table>

PDA Ch1 254nm

| Peak# | Ret. Time | Area    | Area%   | Height |
|-------|-----------|---------|---------|--------|
| 1     | 33.070    | 126245  | 2.593   | 2084   |
| 2     | 47.288    | 4742940 | 97.407  | 49996  |
| Total |           | 4869185 | 100.000 | 52080  |

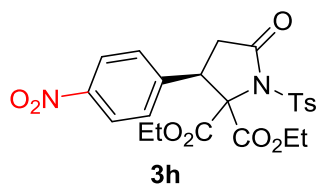

### <Chromatogram>

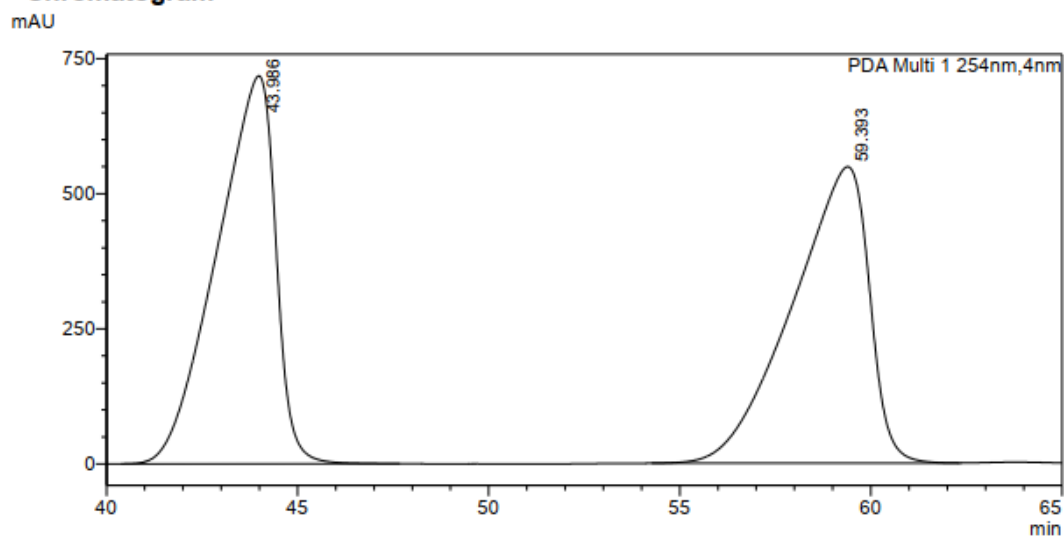

### <Peak Table>

PDA Ch1 254nm

| Peak# | Ret. Time | Area      | Area%   | Height  |
|-------|-----------|-----------|---------|---------|
| 1     | 43.986    | 77022294  | 50.074  | 717790  |
| 2     | 59.393    | 76793221  | 49.926  | 548430  |
| Total |           | 153815515 | 100.000 | 1266220 |

### <Chromatogram>

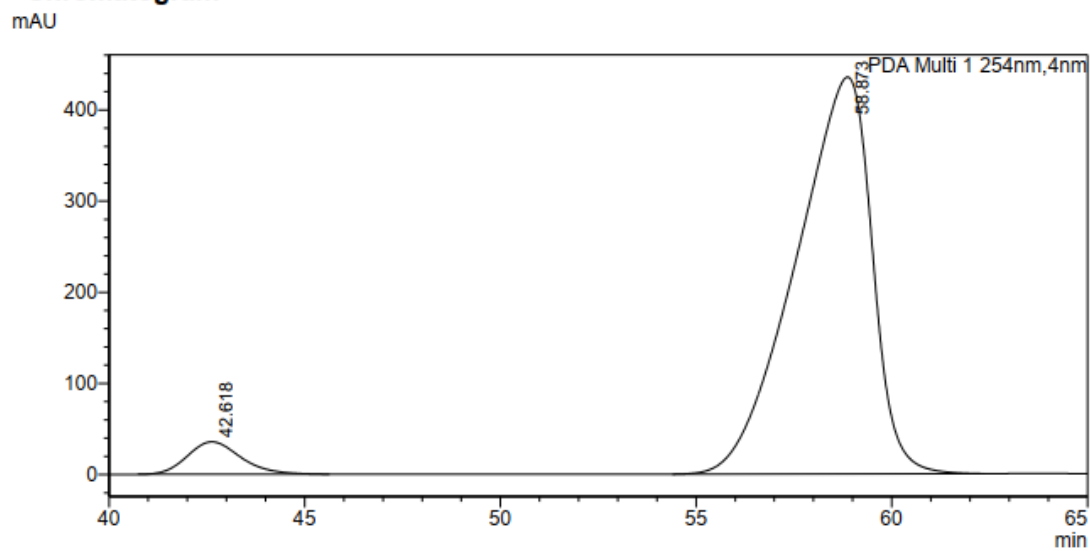

### <Peak Table>

PDA Ch1 254nm

| Peak# | Ret. Time | Area     | Area%   | Height |
|-------|-----------|----------|---------|--------|
| 1     | 42.618    | 3398493  | 5.448   | 35608  |
| 2     | 58.873    | 58976695 | 94.552  | 435225 |
| Total |           | 62375188 | 100.000 | 470834 |



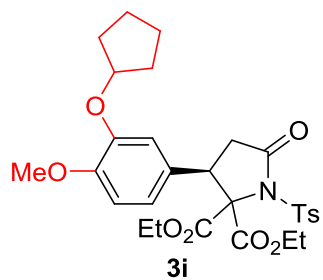

### <Chromatogram>

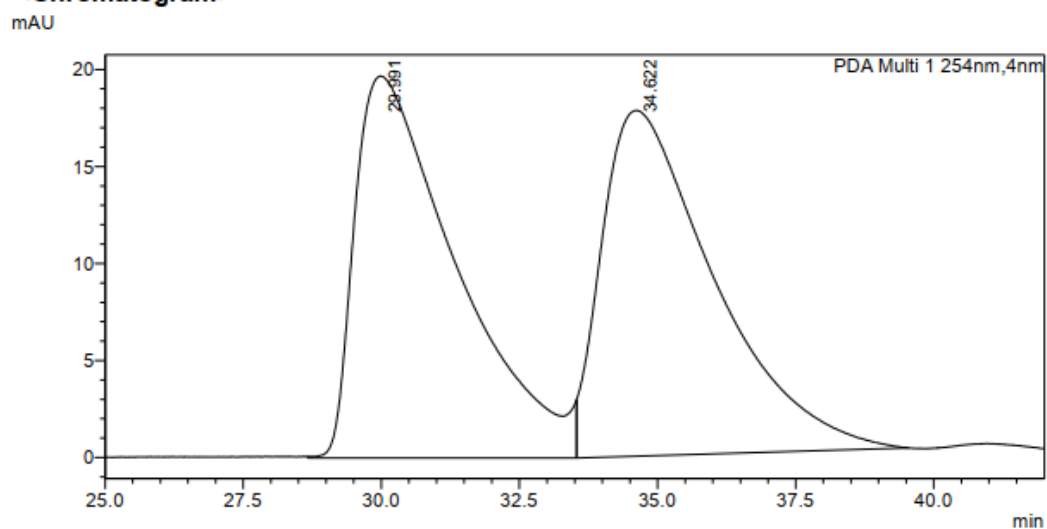

### <Peak Table>

PDA Ch1 254nm

| Peak# | Ret. Time | Area    | Area%   | Height |
|-------|-----------|---------|---------|--------|
| 1     | 29.991    | 2516362 | 49.942  | 19689  |
| 2     | 34.622    | 2522225 | 50.058  | 17828  |
| Total |           | 5038587 | 100.000 | 37517  |

### <Chromatogram>

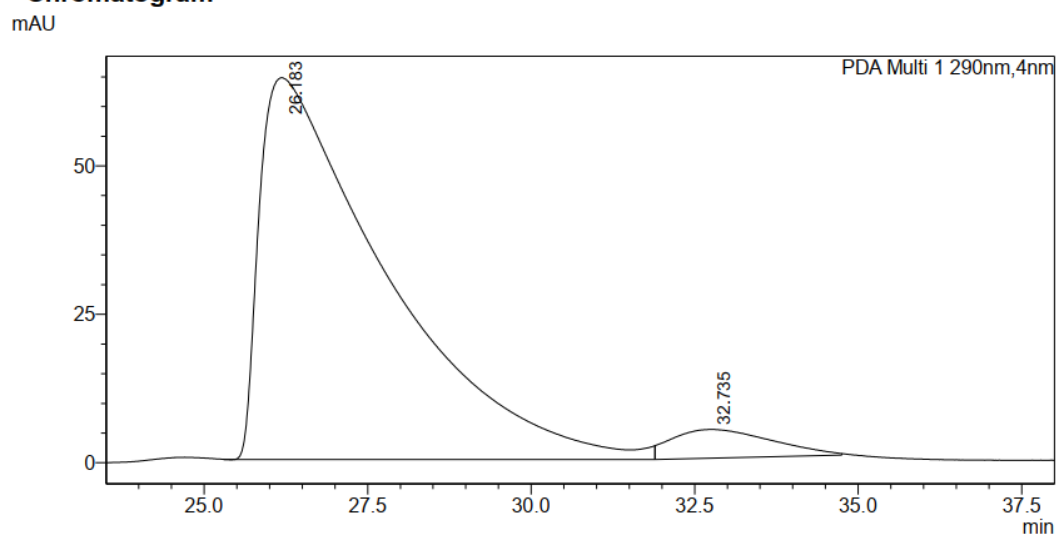

### <Peak Table>

PDA Ch1 290nm

| Peak# | Ret. Time | Area    | Height | Area%   |
|-------|-----------|---------|--------|---------|
| 1     | 26.183    | 8627803 | 64273  | 94.435  |
| 2     | 32.735    | 508426  | 4830   | 5.565   |
| Total |           | 9136229 | 69104  | 100.000 |

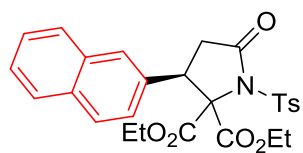

3j

### <Chromatogram>

mAU

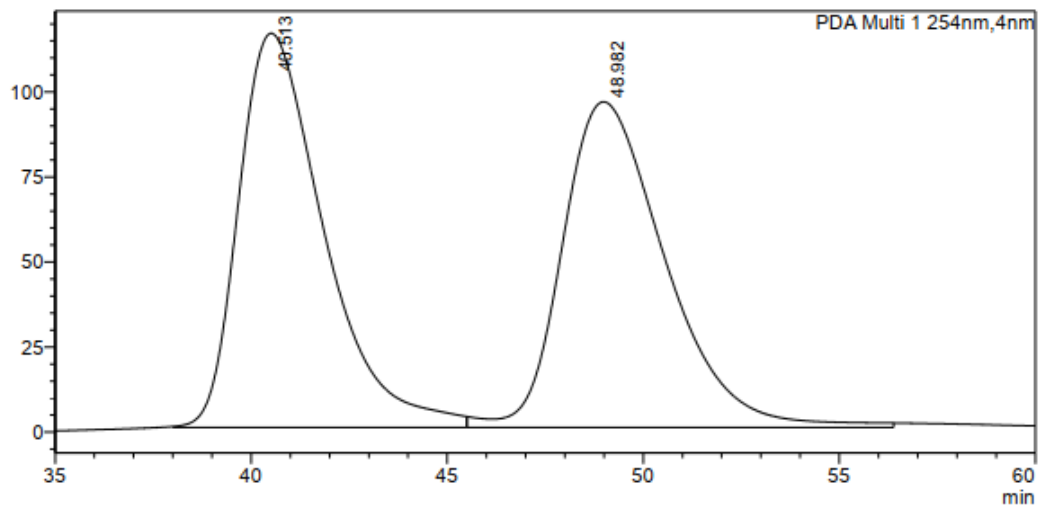

### <Peak Table>

PDA Ch1 254nm

| Peak# | Ret. Time | Area     | Area%   | Height |
|-------|-----------|----------|---------|--------|
| 1     | 40.513    | 17495276 | 49.981  | 115880 |
| 2     | 48.982    | 17508852 | 50.019  | 95729  |
| Total |           | 35004127 | 100.000 | 211608 |

### <Chromatogram>

mAU

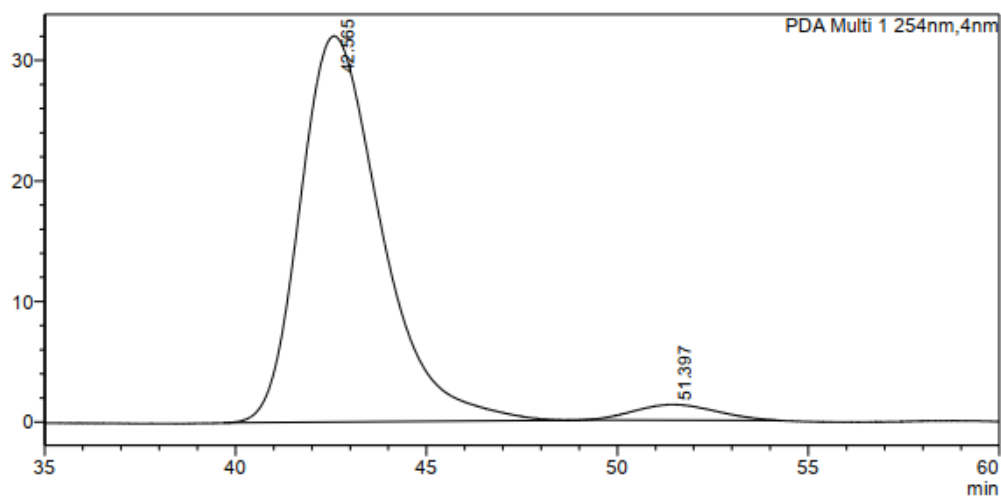

### <Peak Table>

PDA Ch1 254nm

| Peak# | Ret. Time | Area    | Area%   | Height |
|-------|-----------|---------|---------|--------|
| 1     | 42.565    | 4724860 | 96.073  | 32007  |
| 2     | 51.397    | 193105  | 3.927   | 1295   |
| Total |           | 4917965 | 100.000 | 33301  |

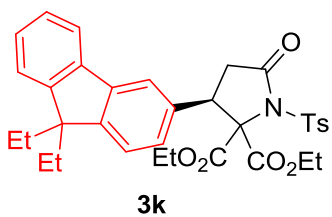

### <Chromatogram>

mAU

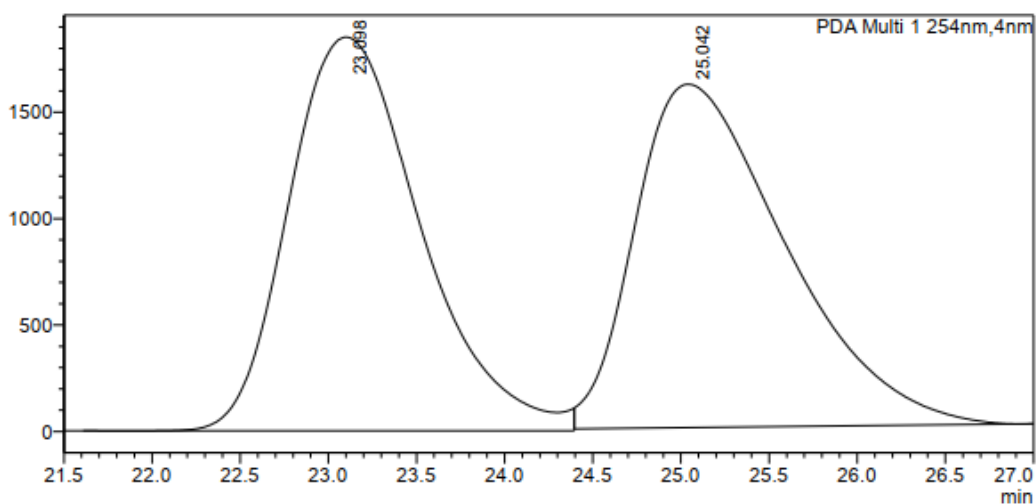

### <Peak Table>

PDA Ch1 254nm

| Peak# | Ret. Time | Area      | Area%   | Height  |
|-------|-----------|-----------|---------|---------|
| 1     | 23.098    | 96205862  | 50.093  | 1849295 |
| 2     | 25.042    | 95847496  | 49.907  | 1613493 |
| Total |           | 192053359 | 100.000 | 3462787 |

### <Chromatogram>

mAU

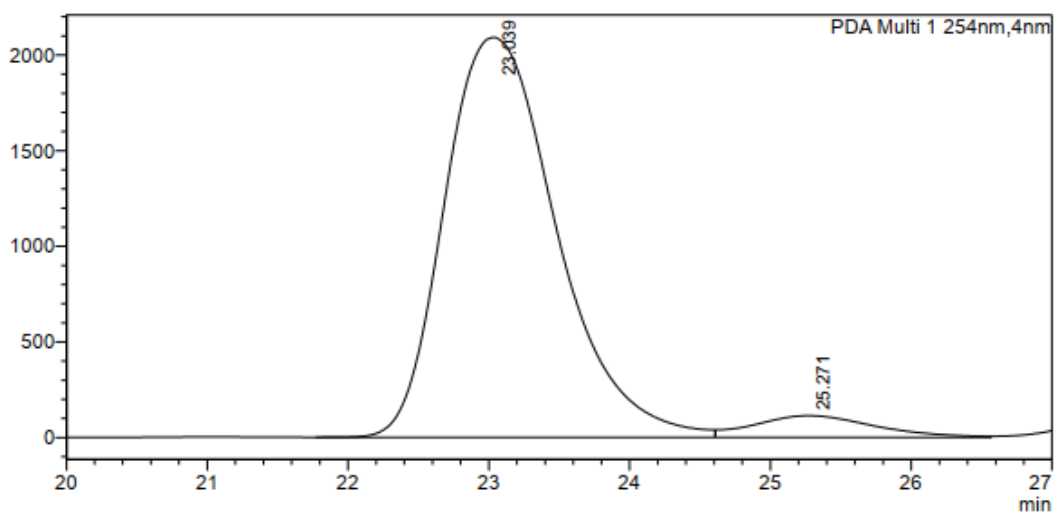

### <Peak Table>

PDA Ch1 254nm

| Peak# | Ret. Time | Area      | Area%   | Height  |
|-------|-----------|-----------|---------|---------|
| 1     | 23.039    | 115754687 | 94.497  | 2091005 |
| 2     | 25.271    | 6741482   | 5.503   | 113492  |
| Total |           | 122496170 | 100.000 | 2204498 |

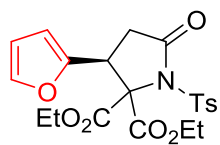

3I

### <Chromatogram>

mAU

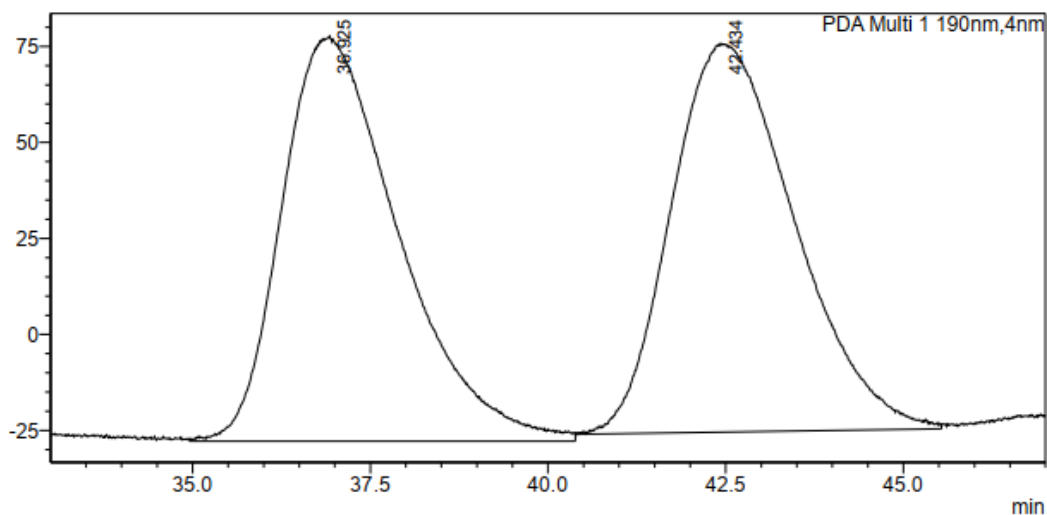

### <Peak Table>

PDA Ch1 190nm

| Peak# | Ret. Time | Area     | Height | Area%   |
|-------|-----------|----------|--------|---------|
| 1     | 36.925    | 12029489 | 105441 | 49.661  |
| 2     | 42.434    | 12193820 | 101103 | 50.339  |
| Total |           | 24223309 | 206544 | 100.000 |

### <Chromatogram>

mAU

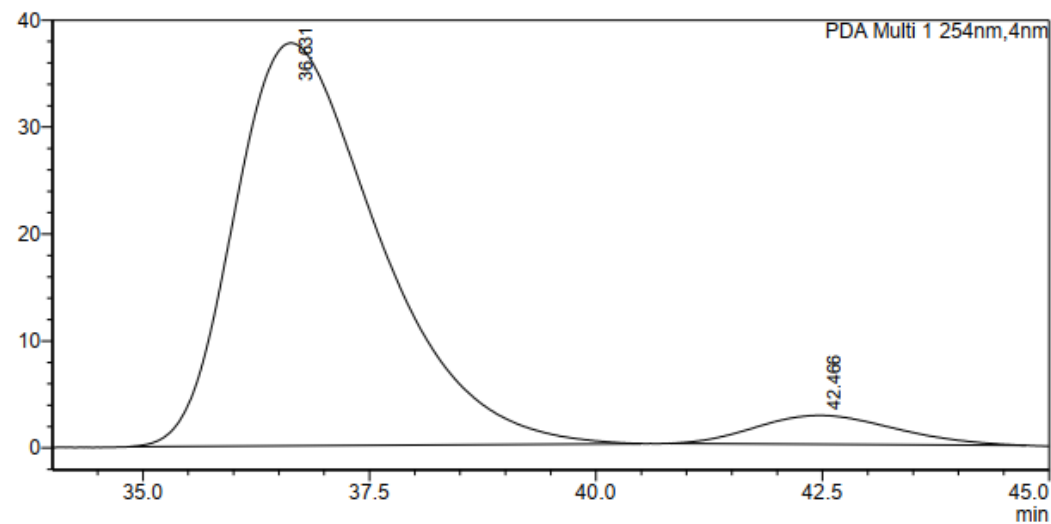

### <Peak Table>

PDA Ch1 254nm

| Peak# | Ret. Time | Area    | Height | Area%   |
|-------|-----------|---------|--------|---------|
| 1     | 36.631    | 4170603 | 37665  | 93.546  |
| 2     | 42.466    | 287721  | 2695   | 6.454   |
| Total |           | 4458325 | 40360  | 100.000 |

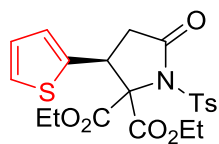

**3m**

### <Chromatogram>

mAU

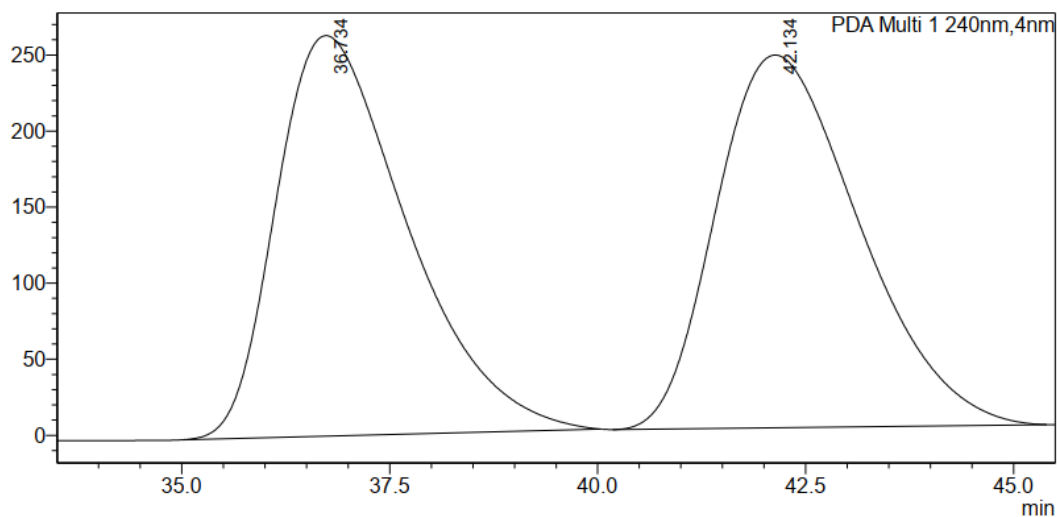

### <Peak Table>

PDA Ch1 240nm

| Peak# | Ret. Time | Area     | Height | Area%   |
|-------|-----------|----------|--------|---------|
| 1     | 36.734    | 28772579 | 263220 | 49.538  |
| 2     | 42.134    | 29309605 | 244974 | 50.462  |
| Total |           | 58082184 | 508193 | 100.000 |

### <Chromatogram>

mAU

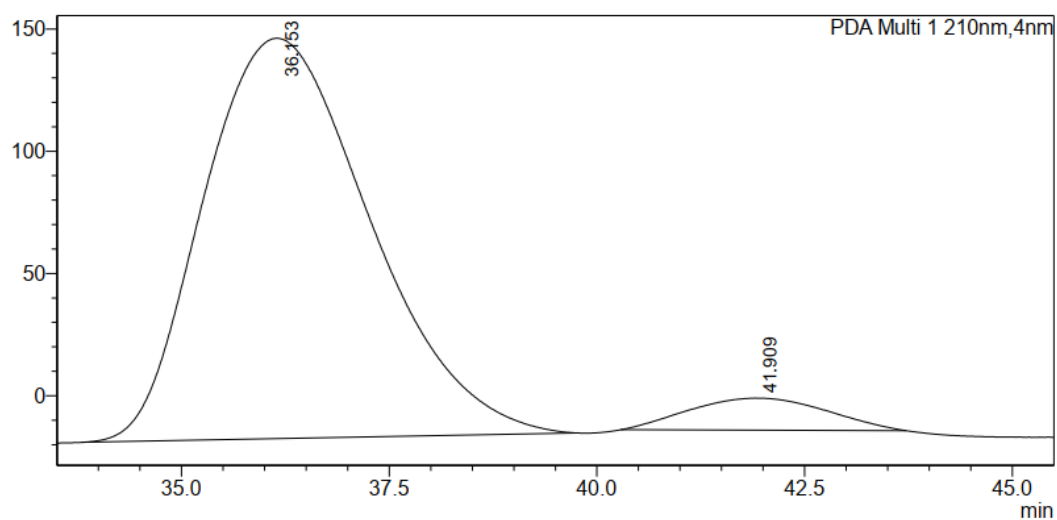

### <Peak Table>

PDA Ch1 210nm

| Peak# | Ret. Time | Area     | Height | Area%   |
|-------|-----------|----------|--------|---------|
| 1     | 36.153    | 22816748 | 163775 | 93.774  |
| 2     | 41.909    | 1514992  | 13118  | 6.226   |
| Total |           | 24331741 | 176893 | 100.000 |

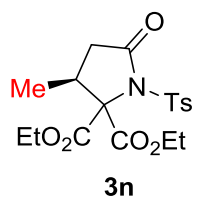

### <Chromatogram>

mAU

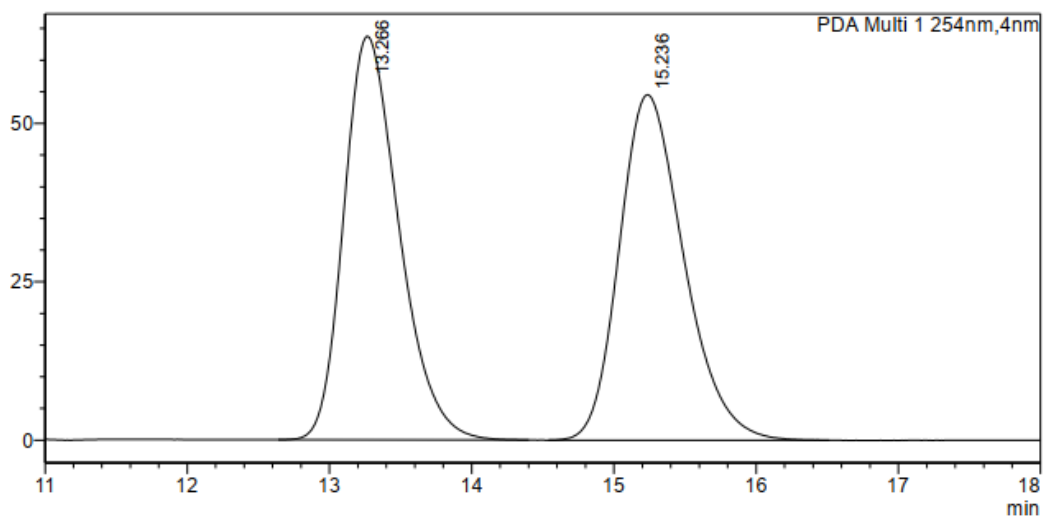

### <Peak Table>

PDA Ch1 254nm

| Peak# | Ret. Time | Area    | Height | Area%   |
|-------|-----------|---------|--------|---------|
| 1     | 13.266    | 1724883 | 63700  | 50.022  |
| 2     | 15.236    | 1723376 | 54520  | 49.978  |
| Total |           | 3448259 | 118220 | 100.000 |

### <Chromatogram>

mAU

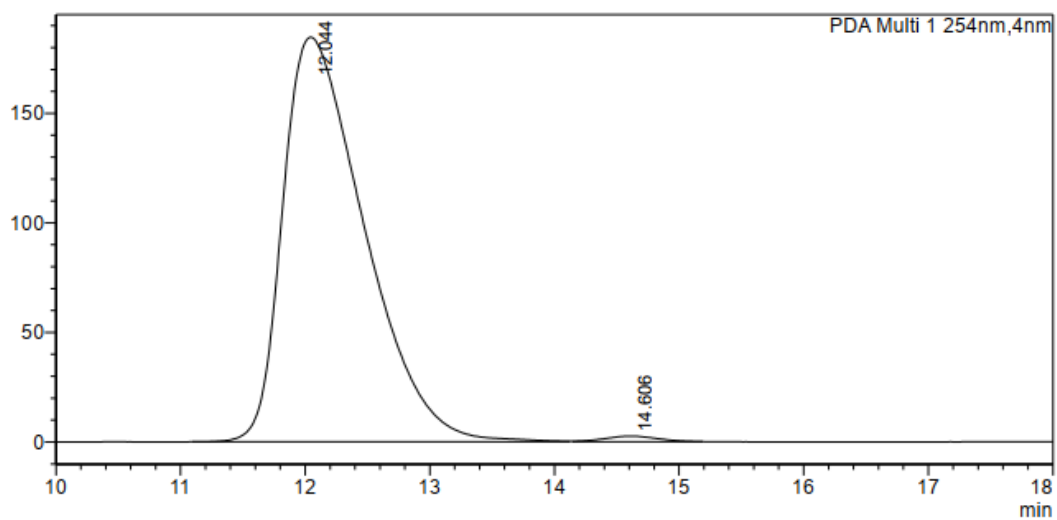

### <Peak Table>

PDA Ch1 254nm

| Peak# | Ret. Time | Area    | Height | Area%   |
|-------|-----------|---------|--------|---------|
| 1     | 12.044    | 8413464 | 184687 | 99.081  |
| 2     | 14.606    | 78079   | 2600   | 0.919   |
| Total |           | 8491543 | 187286 | 100.000 |

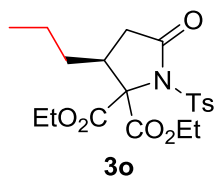

### <Chromatogram>

mAU

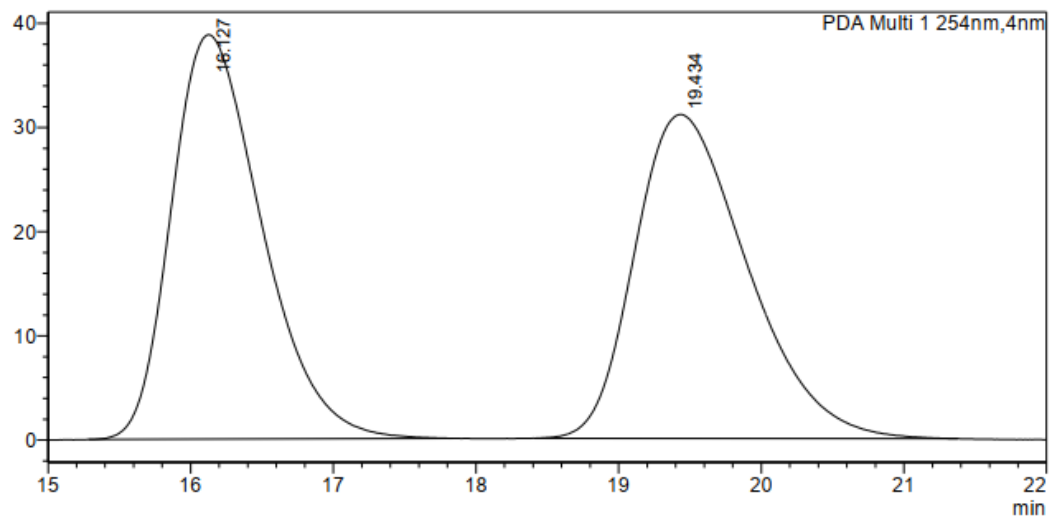

### <Peak Table>

PDA Ch1 254nm

| Peak# | Ret. Time | Area    | Height | Area%   |
|-------|-----------|---------|--------|---------|
| 1     | 16.127    | 1712095 | 38832  | 50.042  |
| 2     | 19.434    | 1709223 | 31104  | 49.958  |
| Total |           | 3421318 | 69936  | 100.000 |

### <Chromatogram>

mAU

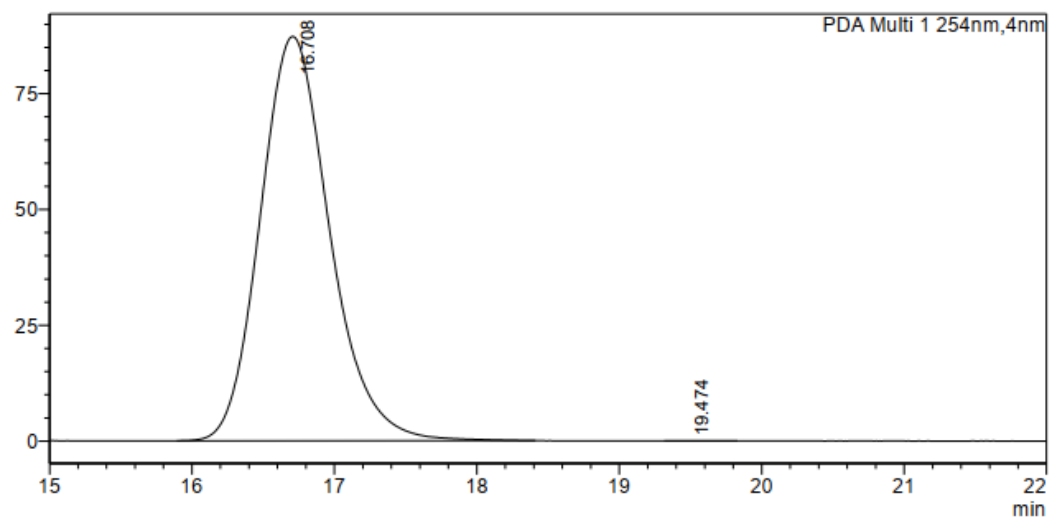

### <Peak Table>

PDA Ch1 254nm

| Peak# | Ret. Time | Area    | Height | Area%   |
|-------|-----------|---------|--------|---------|
| 1     | 16.708    | 2964119 | 87282  | 99.997  |
| 2     | 19.474    | 87      | 16     | 0.003   |
| Total |           | 2964206 | 87298  | 100.000 |

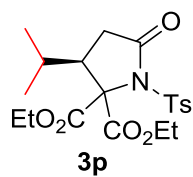

### <Chromatogram>

mAU

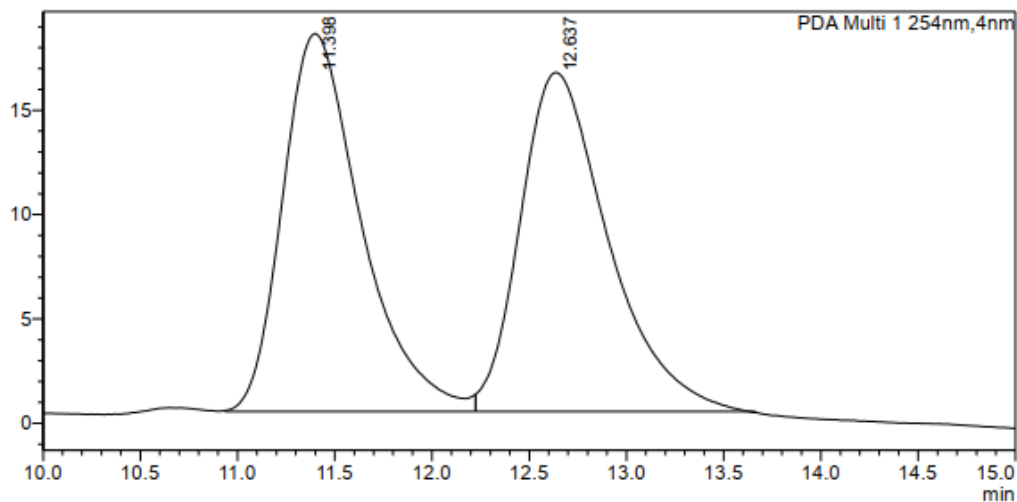

### <Peak Table>

PDA Ch1 254nm

| Peak# | Ret. Time | Area    | Area%   | Height |
|-------|-----------|---------|---------|--------|
| 1     | 11.398    | 510330  | 49.982  | 18099  |
| 2     | 12.637    | 510705  | 50.018  | 16240  |
| Total |           | 1021035 | 100.000 | 34339  |

### <Chromatogram>

mAU

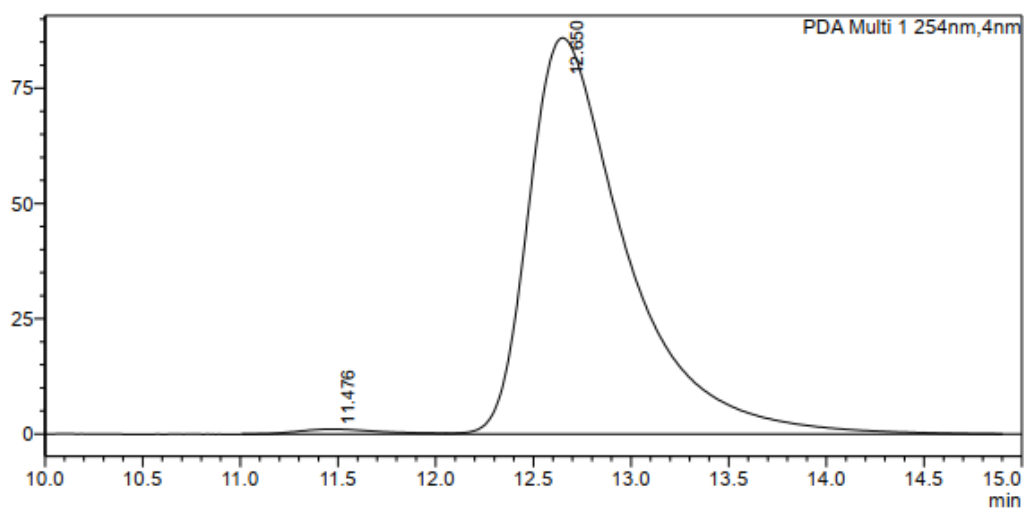

### <Peak Table>

PDA Ch1 254nm

| Peak# | Ret. Time | Area    | Area%   | Height |
|-------|-----------|---------|---------|--------|
| 1     | 11.476    | 32270   | 1.069   | 1100   |
| 2     | 12.650    | 2986817 | 98.931  | 85943  |
| Total |           | 3019088 | 100.000 | 87042  |



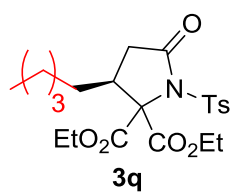

### <Chromatogram>

mAU

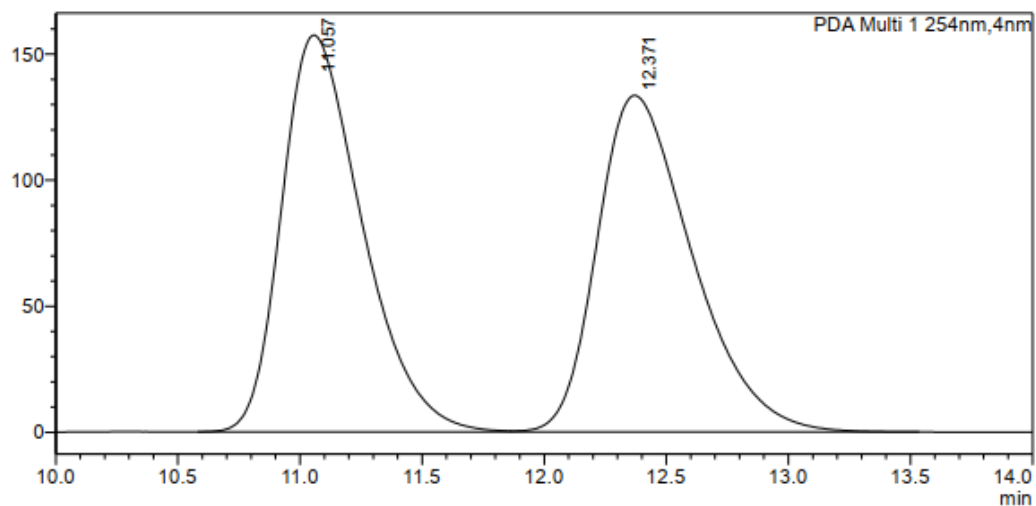

### <Peak Table>

PDA Ch1 254nm

| Peak# | Ret. Time | Area    | Area%   | Height |
|-------|-----------|---------|---------|--------|
| 1     | 11.057    | 3619109 | 49.992  | 157343 |
| 2     | 12.371    | 3620195 | 50.008  | 133485 |
| Total |           | 7239303 | 100.000 | 290828 |

### <Chromatogram>

mAU

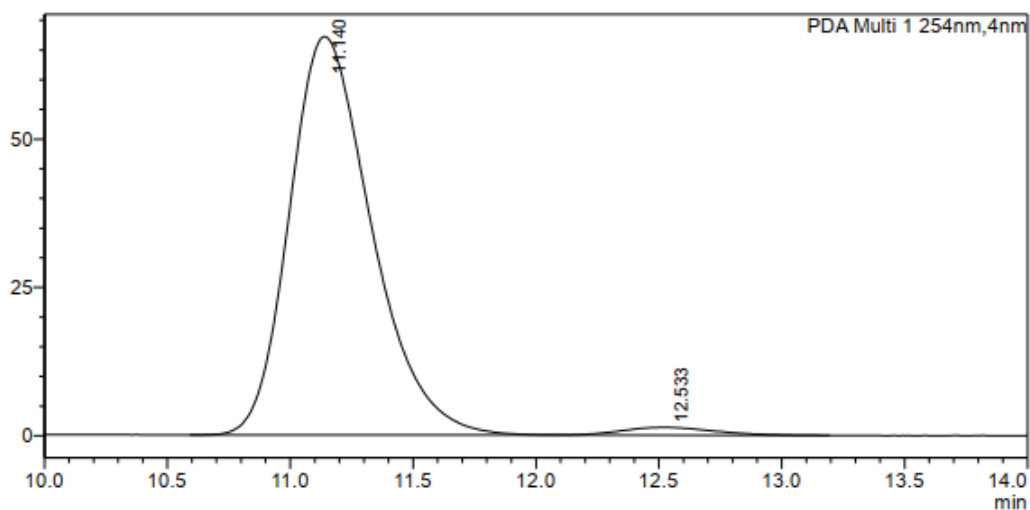

### <Peak Table>

PDA Ch1 254nm

| Peak# | Ret. Time | Area    | Area%   | Height |
|-------|-----------|---------|---------|--------|
| 1     | 11.140    | 1564904 | 97.855  | 67142  |
| 2     | 12.533    | 34306   | 2.145   | 1321   |
| Total |           | 1599209 | 100.000 | 68462  |

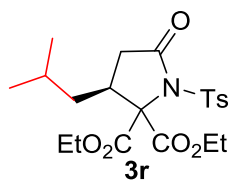

### <Chromatogram>

mAU

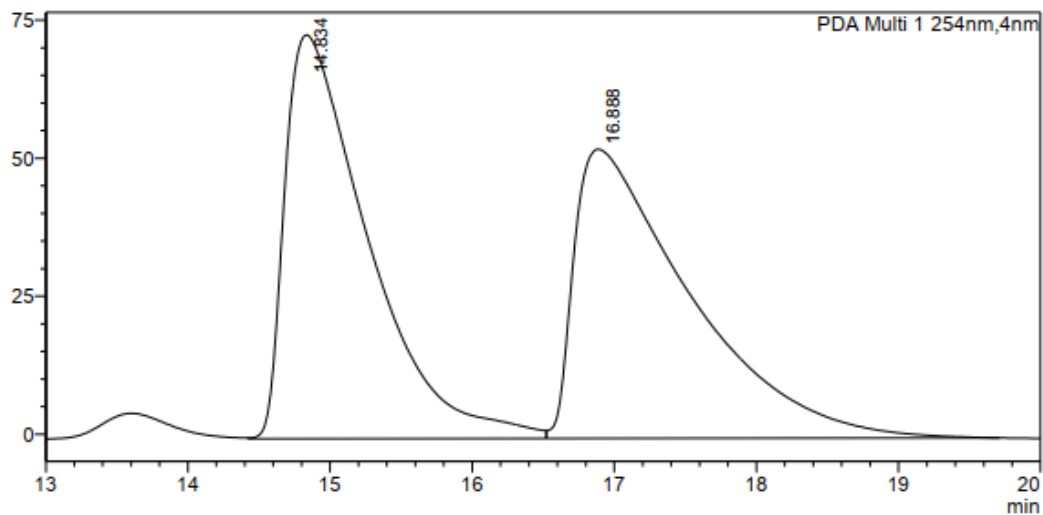

### <Peak Table>

PDA Ch1 254nm

| Peak# | Ret. Time | Area    | Area%   | Height |
|-------|-----------|---------|---------|--------|
| 1     | 14.834    | 2971070 | 50.015  | 73117  |
| 2     | 16.888    | 2969251 | 49.985  | 52365  |
| Total |           | 5940322 | 100.000 | 125482 |

### <Chromatogram>

mAU

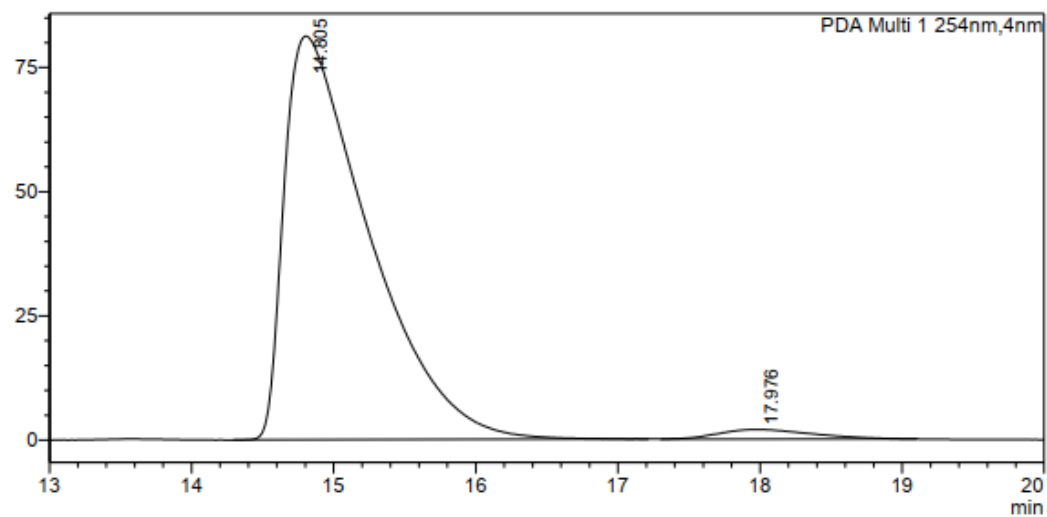

### <Peak Table>

PDA Ch1 254nm

| Peak# | Ret. Time | Area    | Area%   | Height |
|-------|-----------|---------|---------|--------|
| 1     | 14.805    | 3376036 | 97.435  | 81247  |
| 2     | 17.976    | 88893   | 2.565   | 1929   |
| Total |           | 3464929 | 100.000 | 83176  |

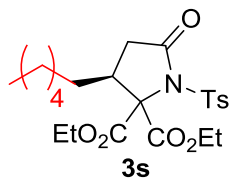

### <Chromatogram>

mAU

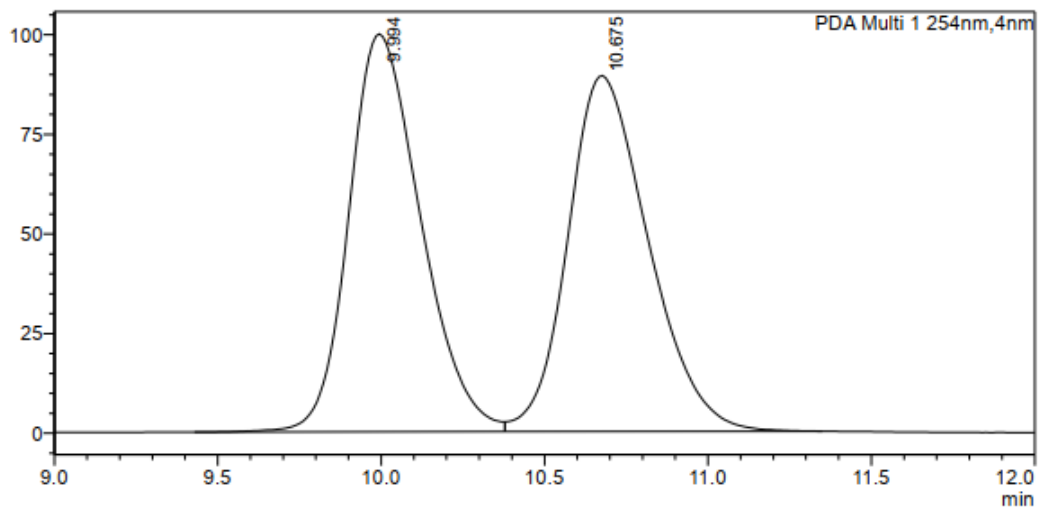

### <Peak Table>

PDA Ch1 254nm

| Peak# | Ret. Time | Area    | Area%   | Height |
|-------|-----------|---------|---------|--------|
| 1     | 9.994     | 1529283 | 49.917  | 99876  |
| 2     | 10.675    | 1534348 | 50.083  | 89296  |
| Total |           | 3063631 | 100.000 | 189171 |

### <Chromatogram>

mAU

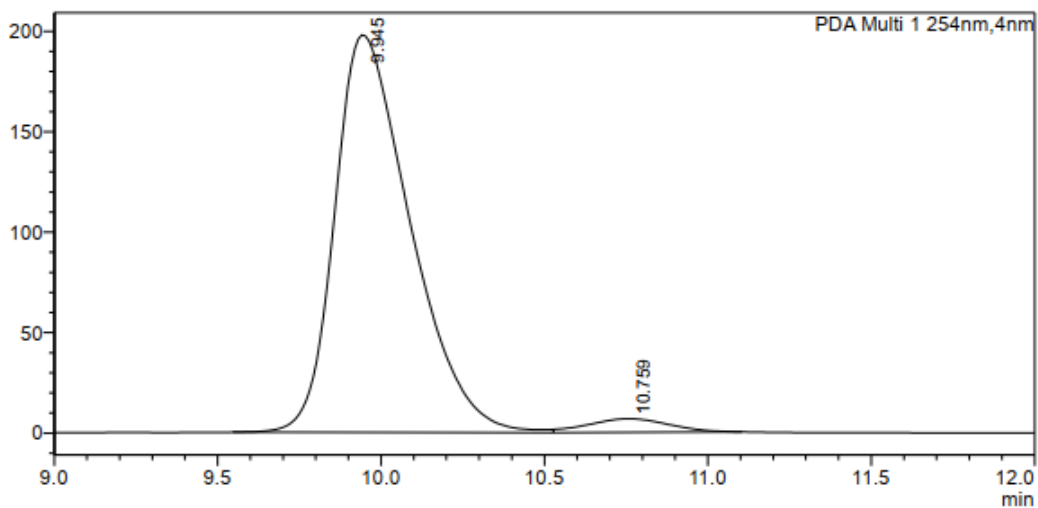

### <Peak Table>

PDA Ch1 254nm

| Peak# | Ret. Time | Area    | Area%   | Height |
|-------|-----------|---------|---------|--------|
| 1     | 9.945     | 3190944 | 96.470  | 197852 |
| 2     | 10.759    | 116771  | 3.530   | 6784   |
| Total |           | 3307715 | 100.000 | 204636 |

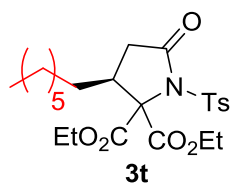

### <Chromatogram>

mAU

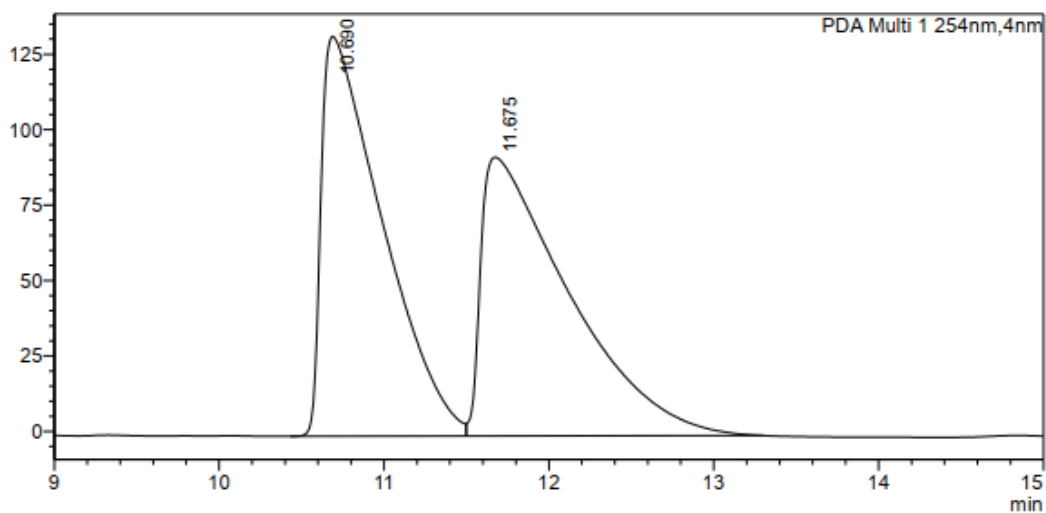

### <Peak Table>

PDA Ch1 254nm

| Peak# | Ret. Time | Area    | Area%   | Height |
|-------|-----------|---------|---------|--------|
| 1     | 10.690    | 3413291 | 49.951  | 132536 |
| 2     | 11.675    | 3419998 | 50.049  | 92316  |
| Total |           | 6833289 | 100.000 | 224851 |

### <Chromatogram>

mAU

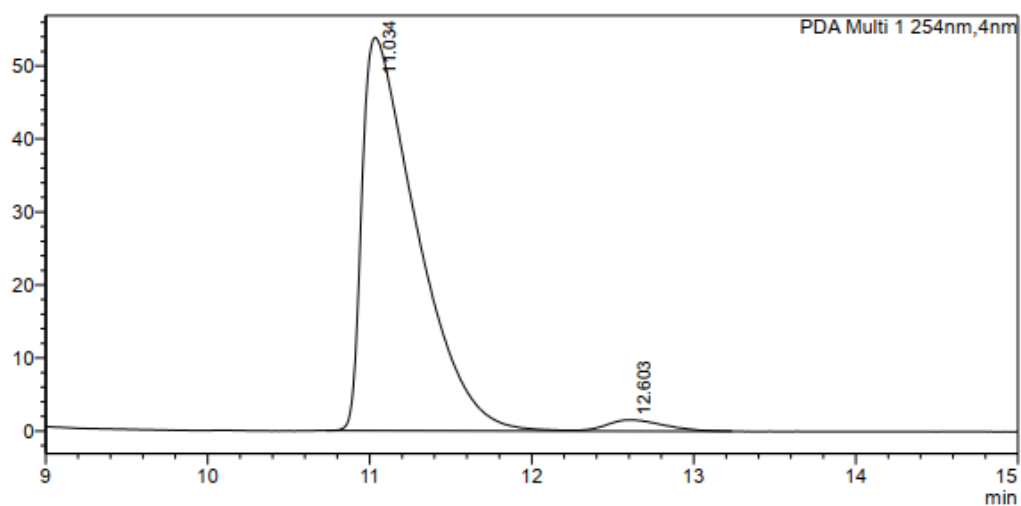

### <Peak Table>

PDA Ch1 254nm

| Peak# | Ret. Time | Area    | Area%   | Height |
|-------|-----------|---------|---------|--------|
| 1     | 11.034    | 1267261 | 97.136  | 53859  |
| 2     | 12.603    | 37365   | 2.864   | 1519   |
| Total |           | 1304626 | 100.000 | 55378  |

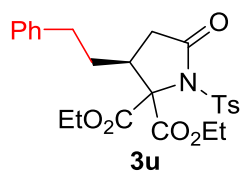

### <Chromatogram>

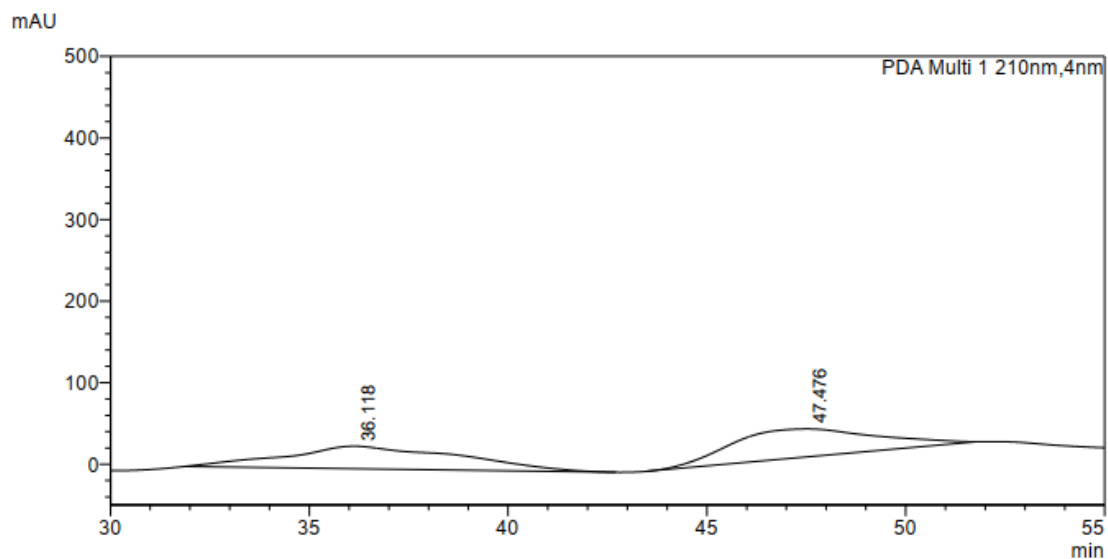

### <Peak Table>

PDA Ch1 210nm

| Peak# | Ret. Time | Area     | Height | Area%   |
|-------|-----------|----------|--------|---------|
| 1     | 36.118    | 8542457  | 27671  | 48.910  |
| 2     | 47.476    | 8923279  | 34567  | 51.090  |
| Total |           | 17465736 | 62239  | 100.000 |

### <Chromatogram>

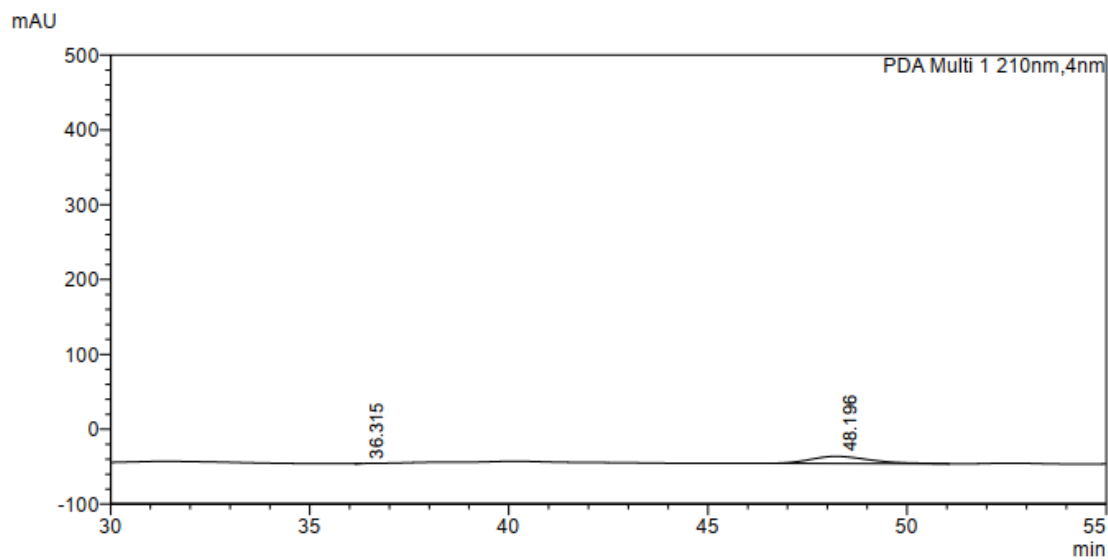

### <Peak Table>

PDA Ch1 210nm

| Peak# | Ret. Time | Area   | Height | Area%   |
|-------|-----------|--------|--------|---------|
| 1     | 36.315    | 3251   | -153   | 0.338   |
| 2     | 48.196    | 957486 | 9407   | 99.662  |
| Total |           | 960737 | 9254   | 100.000 |

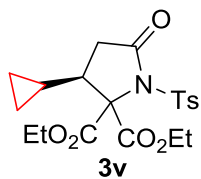

### <Chromatogram>

mAU

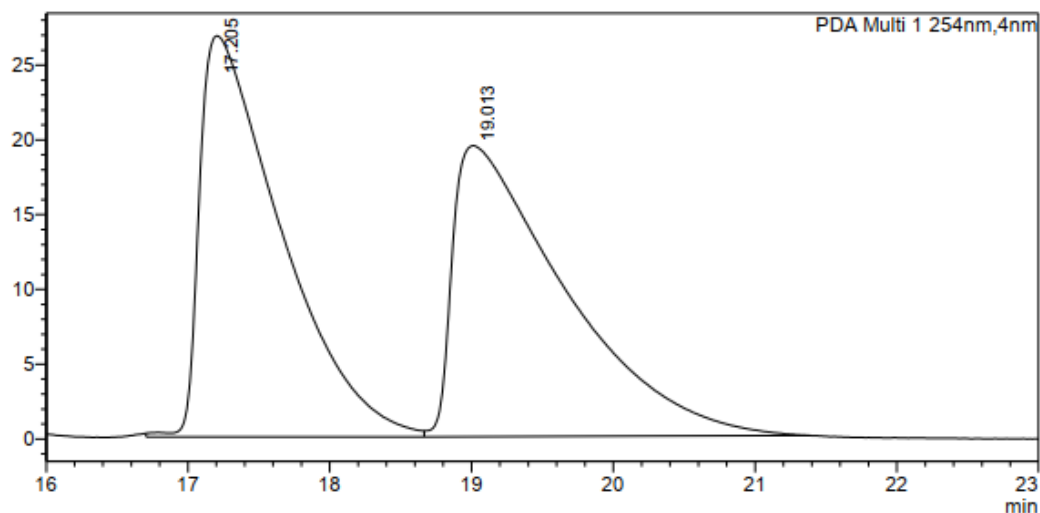

### <Peak Table>

PDA Ch1 254nm

| Peak# | Ret. Time | Area    | Area%   | Height |
|-------|-----------|---------|---------|--------|
| 1     | 17.205    | 1070897 | 49.995  | 26811  |
| 2     | 19.013    | 1071097 | 50.005  | 19450  |
| Total |           | 2141994 | 100.000 | 46261  |

### <Chromatogram>

mAU

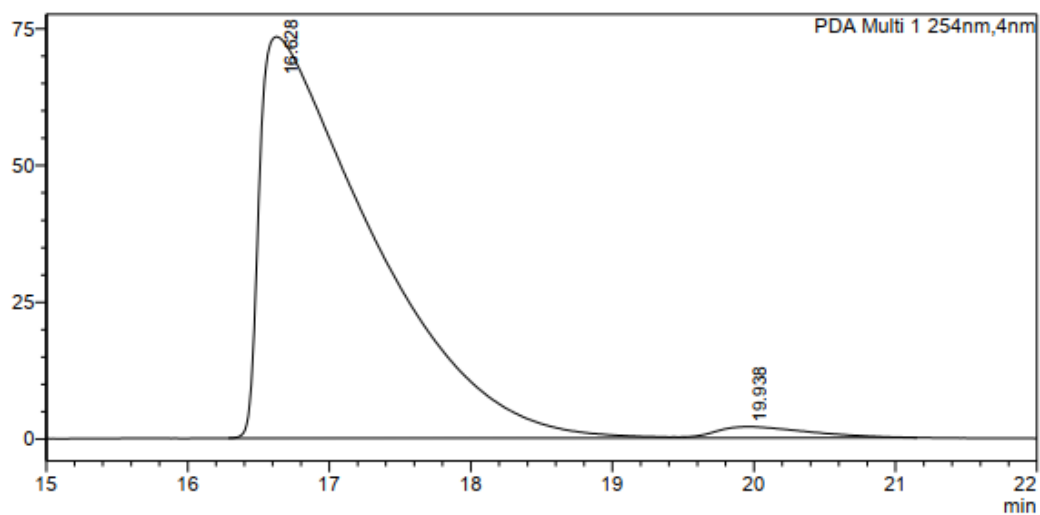

### <Peak Table>

PDA Ch1 254nm

| Peak# | Ret. Time | Area    | Area%   | Height |
|-------|-----------|---------|---------|--------|
| 1     | 16.628    | 4036240 | 97.798  | 73353  |
| 2     | 19.938    | 90899   | 2.202   | 2018   |
| Total |           | 4127138 | 100.000 | 75371  |

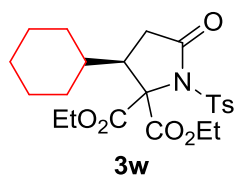

### <Chromatogram>

mAU

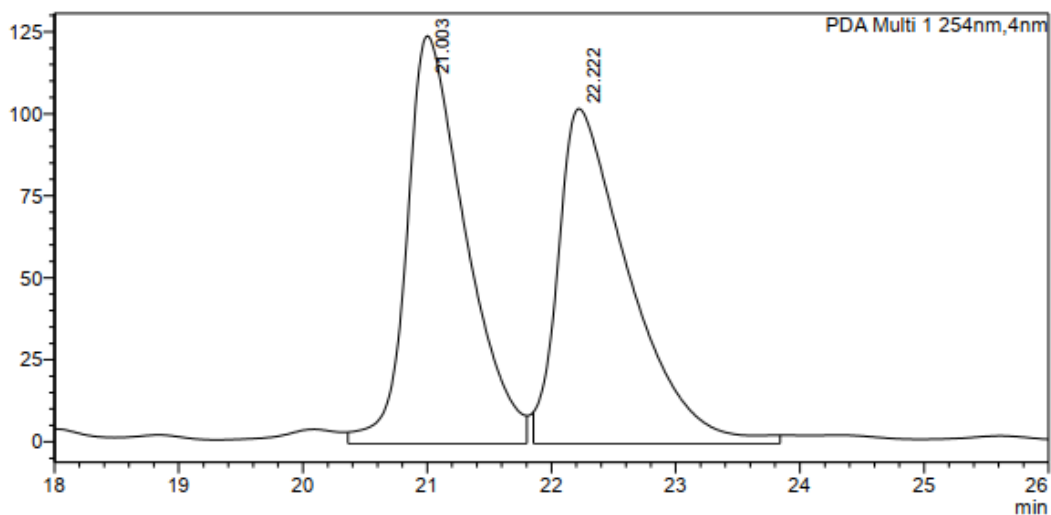

### <Peak Table>

PDA Ch1 254nm

| Peak# | Ret. Time | Area    | Area%   | Height |
|-------|-----------|---------|---------|--------|
| 1     | 21.003    | 4062336 | 50.018  | 124205 |
| 2     | 22.222    | 4059441 | 49.982  | 102054 |
| Total |           | 8121777 | 100.000 | 226259 |

### <Chromatogram>

mAU

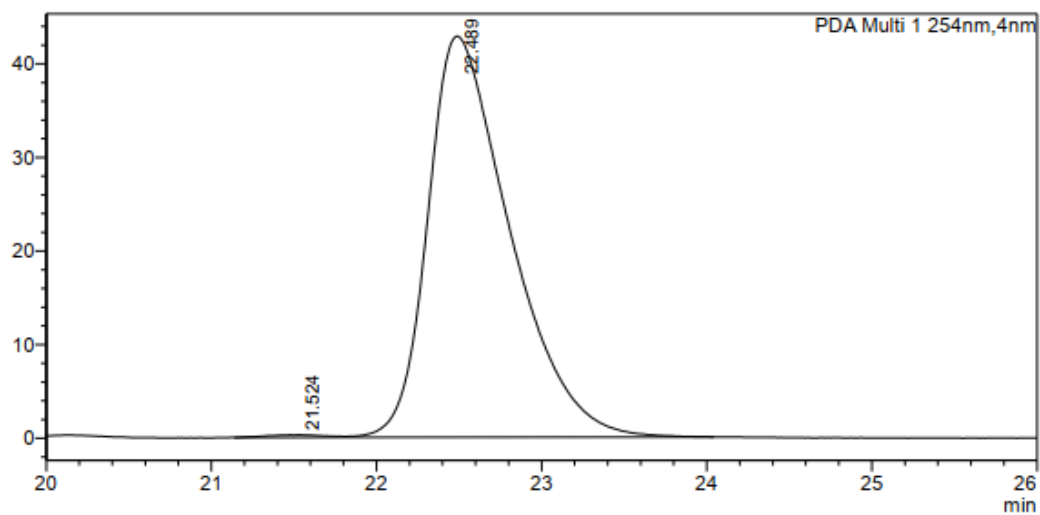

### <Peak Table>

PDA Ch1 254nm

| Peak# | Ret. Time | Area    | Area%   | Height |
|-------|-----------|---------|---------|--------|
| 1     | 21.524    | 6512    | 0.438   | 269    |
| 2     | 22.489    | 1480926 | 99.562  | 42839  |
| Total |           | 1487438 | 100.000 | 43108  |

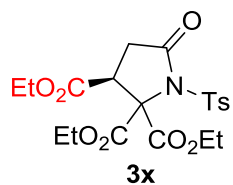

### <Chromatogram>

mAU

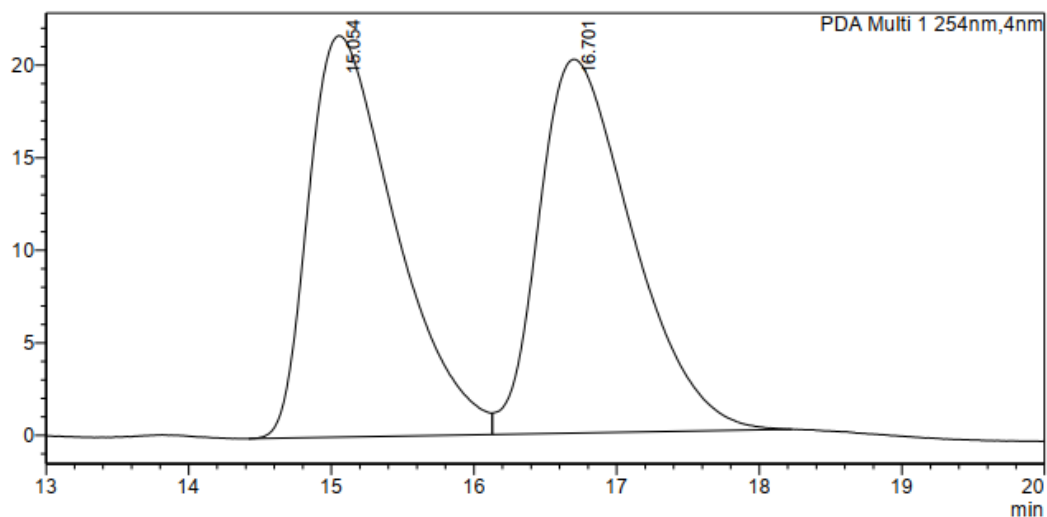

### <Peak Table>

PDA Ch1 254nm

| Peak# | Ret. Time | Area    | Height | Area%   |
|-------|-----------|---------|--------|---------|
| 1     | 15.054    | 920148  | 21689  | 49.937  |
| 2     | 16.701    | 922485  | 20198  | 50.063  |
| Total |           | 1842634 | 41887  | 100.000 |

### <Chromatogram>

mAU

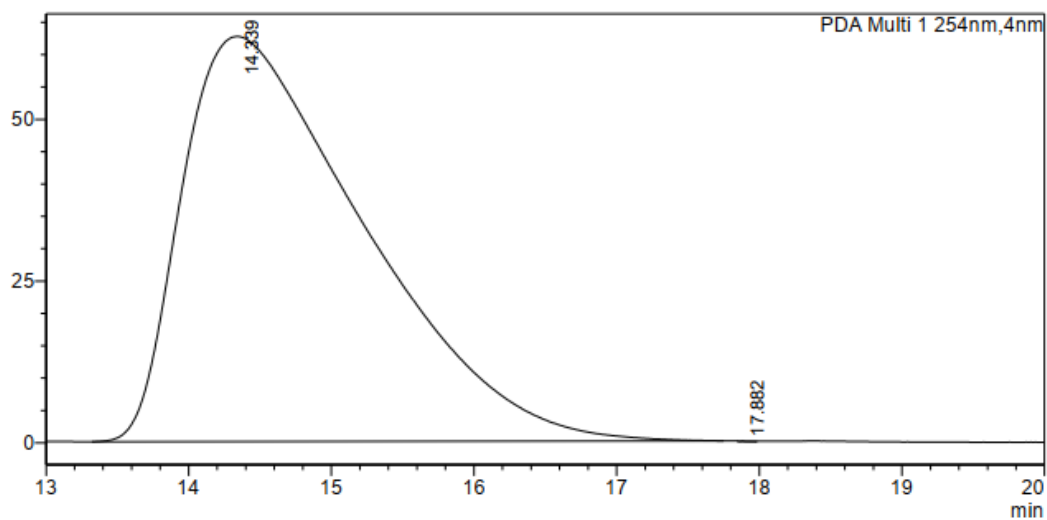

### <Peak Table>

PDA Ch1 254nm

| Peak# | Ret. Time | Area    | Height | Area%   |
|-------|-----------|---------|--------|---------|
| 1     | 14.339    | 5561406 | 62609  | 99.990  |
| 2     | 17.882    | 581     | 69     | 0.010   |
| Total |           | 5561987 | 62678  | 100.000 |



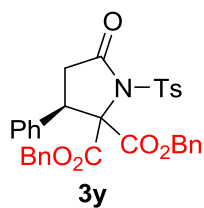

### <Chromatogram>

mAU

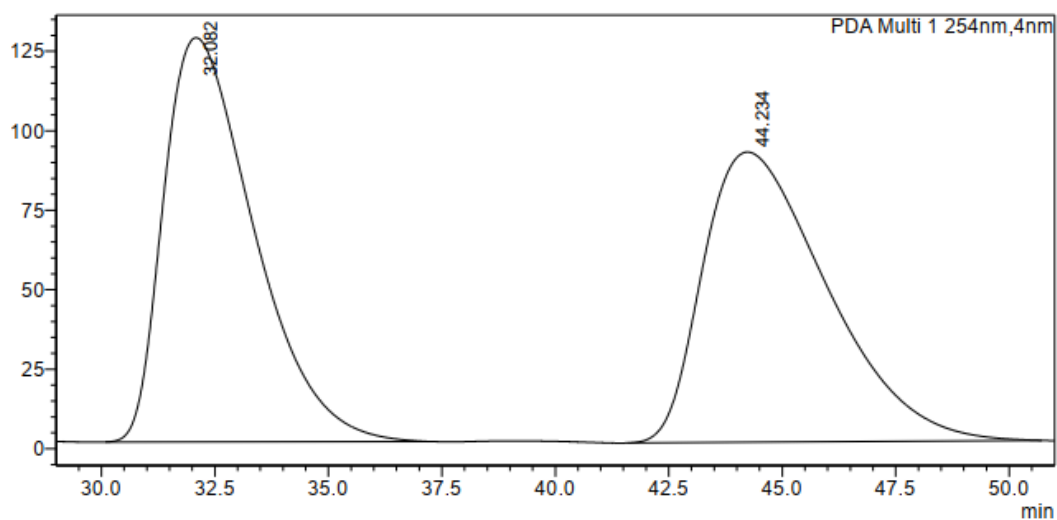

### <Peak Table>

PDA Ch1 254nm

| Peak# | Ret. Time | Area     | Height | Area%   |
|-------|-----------|----------|--------|---------|
| 1     | 32.082    | 17627412 | 127117 | 50.380  |
| 2     | 44.234    | 17361651 | 91275  | 49.620  |
| Total |           | 34989063 | 218392 | 100.000 |

### <Chromatogram>

mAU

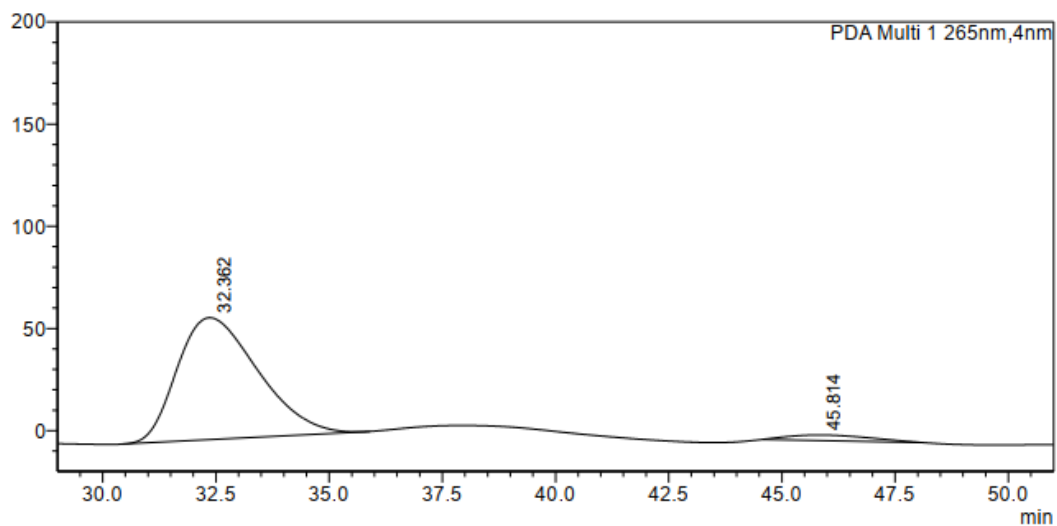

### <Peak Table>

PDA Ch1 265nm

| Peak# | Ret. Time | Area    | Height | Area%   |
|-------|-----------|---------|--------|---------|
| 1     | 32.362    | 7398614 | 59673  | 95.609  |
| 2     | 45.814    | 339828  | 2683   | 4.391   |
| Total |           | 7738442 | 62356  | 100.000 |

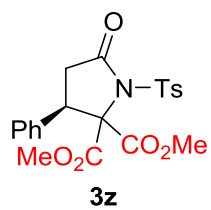

**<Chromatogram>**

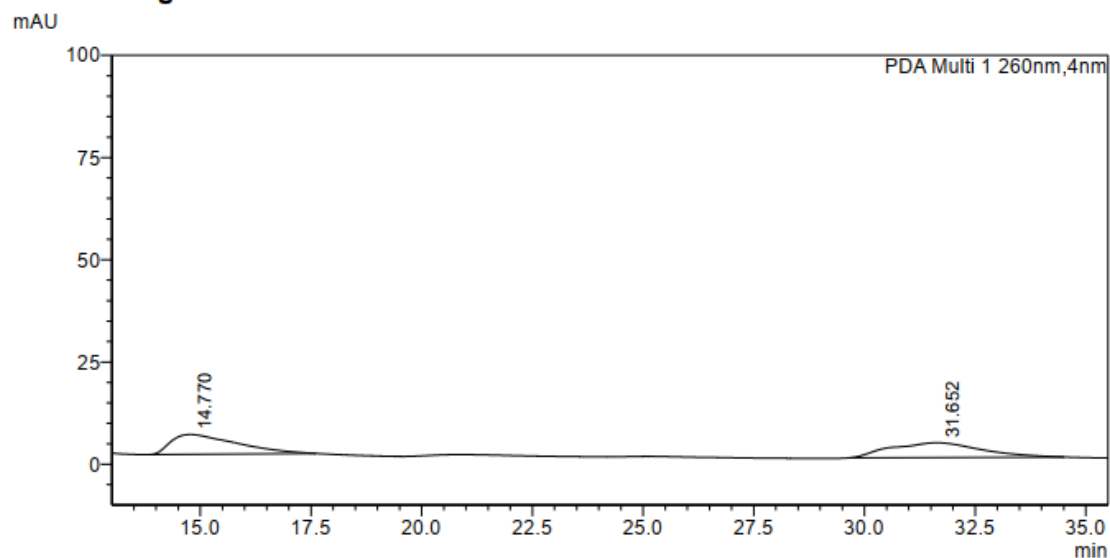

**<Peak Table>**

| PDA Ch1 260nm |           |         |        |         |
|---------------|-----------|---------|--------|---------|
| Peak#         | Ret. Time | Area    | Height | Area%   |
| 1             | 14.770    | 500560  | 4844   | 49.260  |
| 2             | 31.652    | 515594  | 3630   | 50.740  |
| Total         |           | 1016154 | 8474   | 100.000 |

**<Chromatogram>**

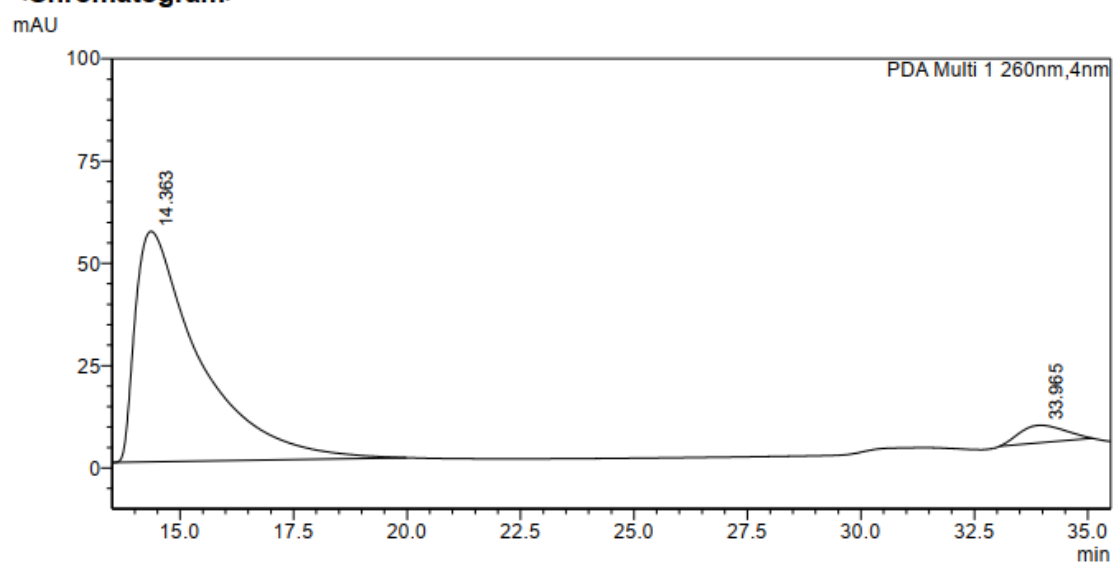

**<Peak Table>**

| PDA Ch1 260nm |           |         |        |         |
|---------------|-----------|---------|--------|---------|
| Peak#         | Ret. Time | Area    | Height | Area%   |
| 1             | 14.363    | 5562108 | 56344  | 94.897  |
| 2             | 33.965    | 299074  | 4269   | 5.103   |
| Total         |           | 5861182 | 60613  | 100.000 |

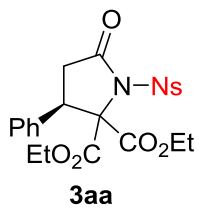

### <Chromatogram>

mAU

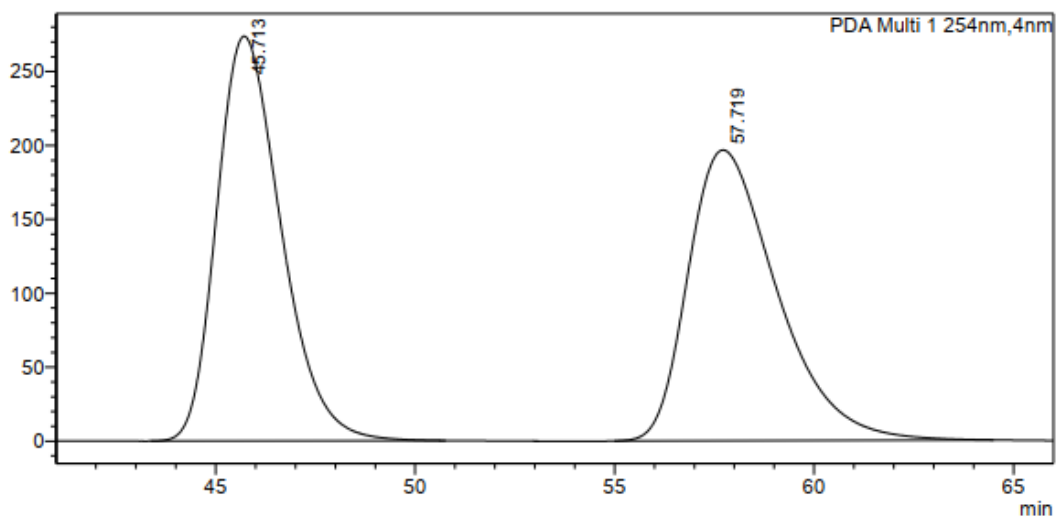

### <Peak Table>

PDA Ch1 254nm

| Peak# | Ret. Time | Area     | Area%   | Height |
|-------|-----------|----------|---------|--------|
| 1     | 45.713    | 30741470 | 50.203  | 273749 |
| 2     | 57.719    | 30493008 | 49.797  | 196632 |
| Total |           | 61234478 | 100.000 | 470381 |

### <Chromatogram>

mAU

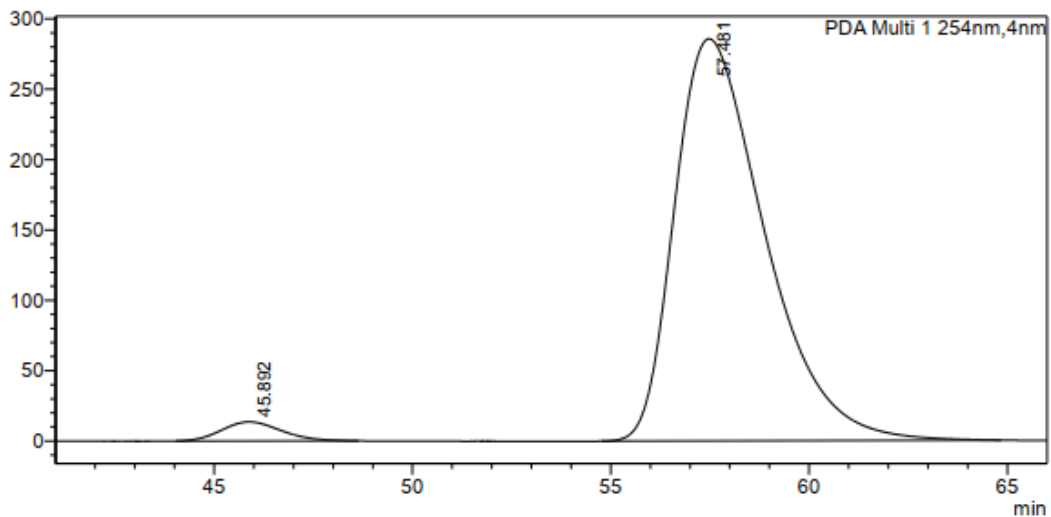

### <Peak Table>

PDA Ch1 254nm

| Peak# | Ret. Time | Area     | Area%   | Height |
|-------|-----------|----------|---------|--------|
| 1     | 45.892    | 1412842  | 3.028   | 13497  |
| 2     | 57.481    | 45242511 | 96.972  | 285742 |
| Total |           | 46655354 | 100.000 | 299239 |

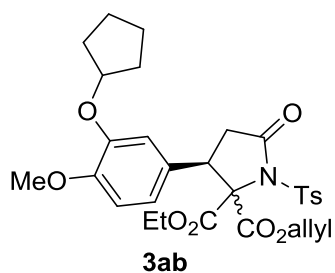

### <Chromatogram>

mAU

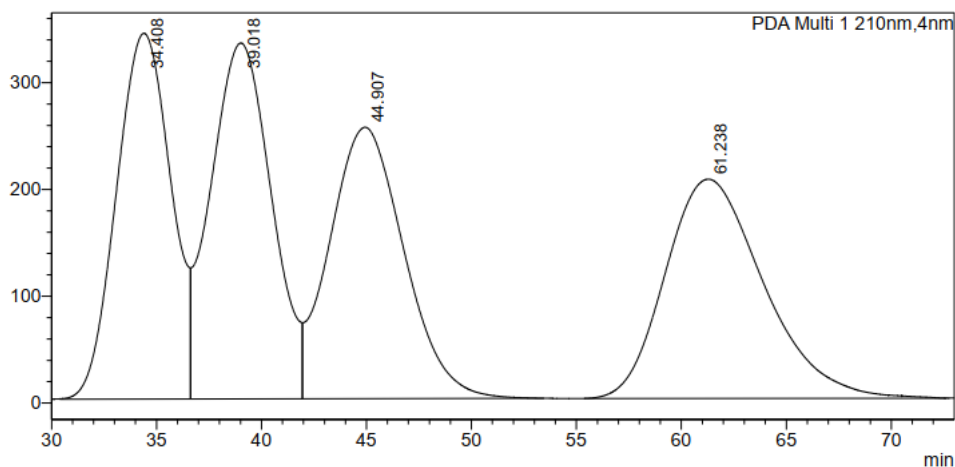

### <Peak Table>

PDA Ch1 210nm

| Peak# | Ret. Time | Area      | Area%   | Height  |
|-------|-----------|-----------|---------|---------|
| 1     | 34.408    | 61749243  | 23.860  | 342565  |
| 2     | 39.018    | 67429389  | 26.055  | 333273  |
| 3     | 44.907    | 62764766  | 24.252  | 254098  |
| 4     | 61.238    | 66854968  | 25.833  | 205362  |
| Total |           | 258798366 | 100.000 | 1135298 |

### <Chromatogram>

mAU

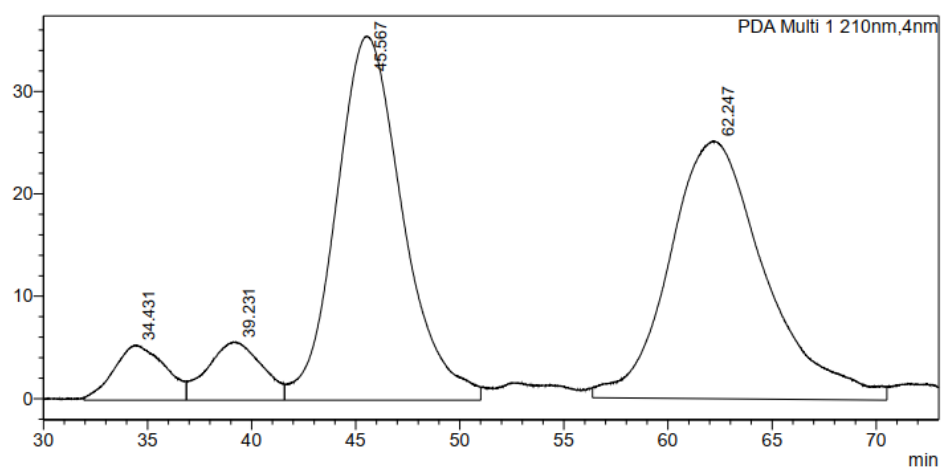

### <Peak Table>

PDA Ch1 210nm

| Peak# | Ret. Time | Area     | Area%   | Height |
|-------|-----------|----------|---------|--------|
| 1     | 34.431    | 923894   | 5.165   | 5378   |
| 2     | 39.231    | 1032174  | 5.770   | 5702   |
| 3     | 45.567    | 7872224  | 44.007  | 35548  |
| 4     | 62.247    | 8060272  | 45.058  | 25150  |
| Total |           | 17888564 | 100.000 | 71778  |

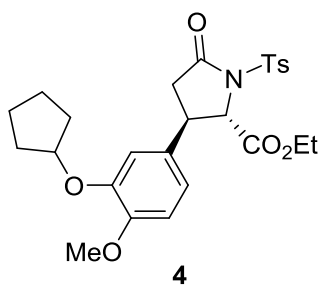

### <Chromatogram>

mAU

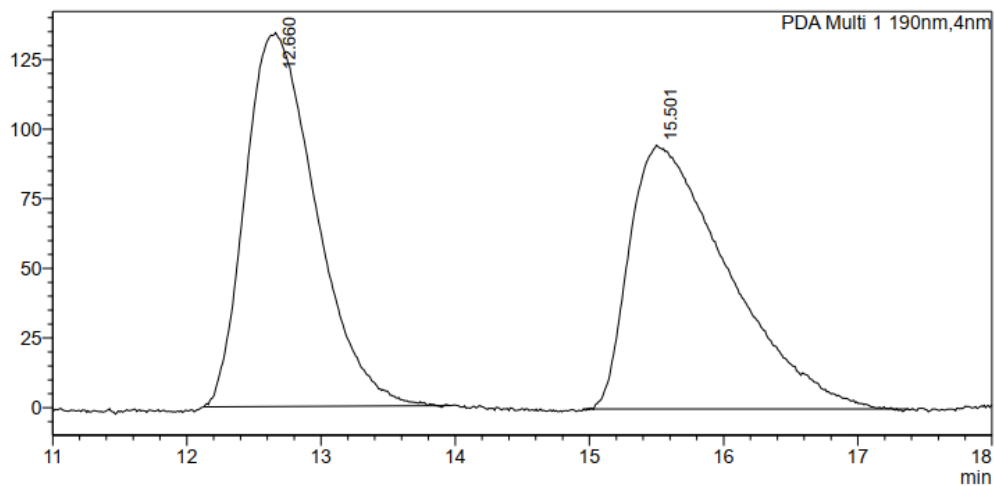

### <Peak Table>

PDA Ch1 190nm

| Peak# | Ret. Time | Area    | Area%   | Height |
|-------|-----------|---------|---------|--------|
| 1     | 12.660    | 4915040 | 50.257  | 134219 |
| 2     | 15.501    | 4864767 | 49.743  | 94678  |
| Total |           | 9779807 | 100.000 | 228897 |

### <Chromatogram>

mAU

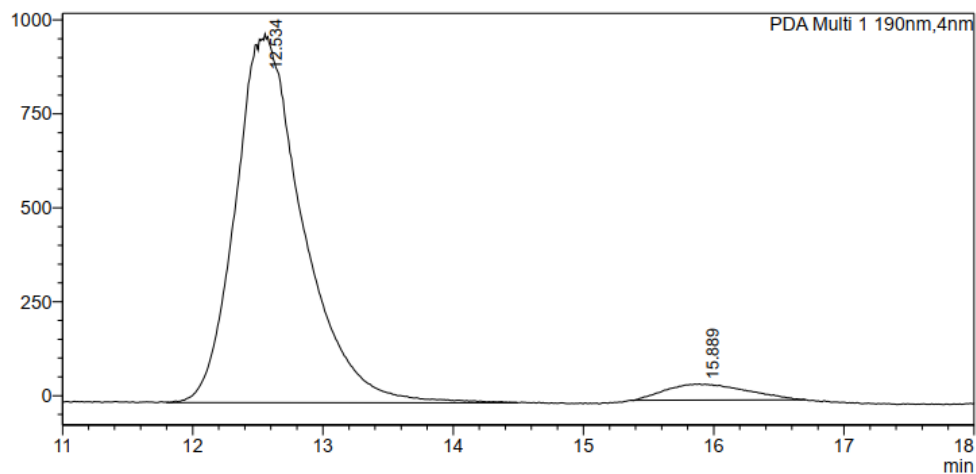

### <Peak Table>

PDA Ch1 190nm

| Peak# | Ret. Time | Area     | Area%   | Height  |
|-------|-----------|----------|---------|---------|
| 1     | 12.534    | 35339761 | 95.076  | 968628  |
| 2     | 15.889    | 1830430  | 4.924   | 42672   |
| Total |           | 37170191 | 100.000 | 1011300 |

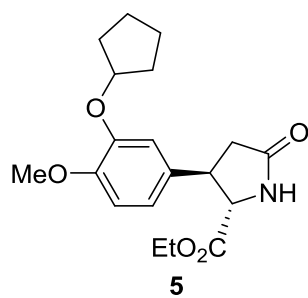

# <Chromatogram>

mAU

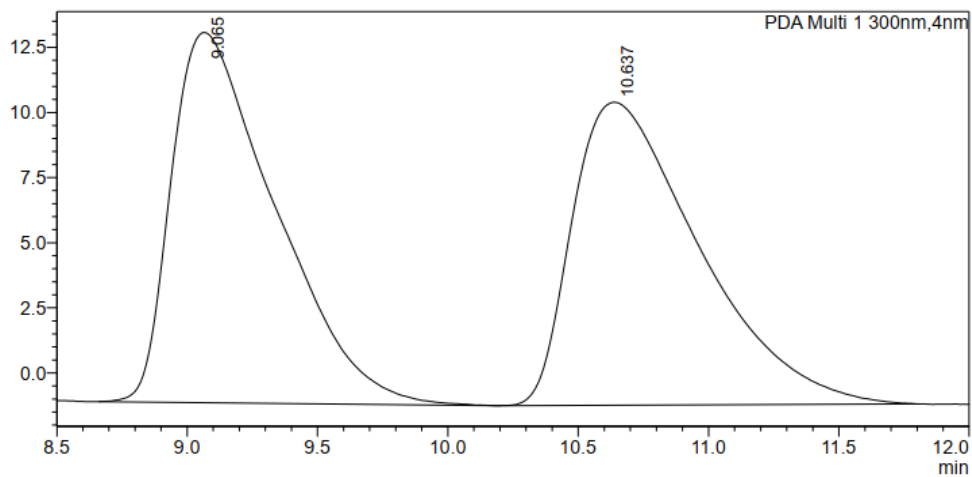

## <Peak Table>

PDA Ch1 300nm

| Peak# | Ret. Time | Area   | Area%   | Height |
|-------|-----------|--------|---------|--------|
| 1     | 9.065     | 394691 | 50.059  | 14215  |
| 2     | 10.637    | 393768 | 49.941  | 11635  |
| Total |           | 788459 | 100.000 | 25850  |

# <Chromatogram>

mAU

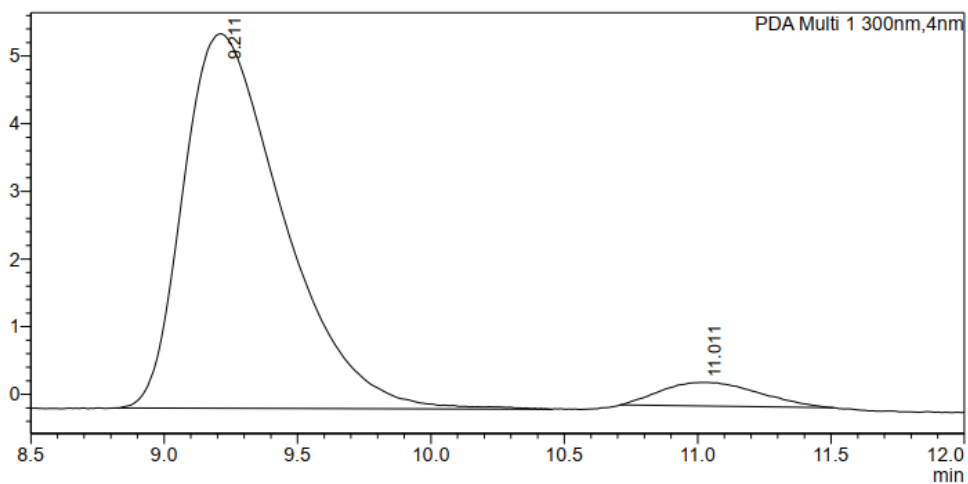

## <Peak Table>

PDA Ch1 300nm

| Peak# | Ret. Time | Area   | Area%   | Height |
|-------|-----------|--------|---------|--------|
| 1     | 9.211     | 144009 | 94.150  | 5532   |
| 2     | 11.011    | 8947   | 5.850   | 349    |
| Total |           | 152956 | 100.000 | 5881   |
